# Supplementary material
Source: PubMed Central journal article supplement (PMC3914402)

# Synthesis and Characterization of Oligodeoxyribonucleotides Modified with 2'-Amino- $\alpha$ -L-LNA Adenine Monomers: High-affinity Targeting of Single-Stranded DNA

Nicolai K. Andersen, Brooke A. Anderson, Jesper Wengel, Patrick J. Hrdlicka \*

## SUPPORTING INFORMATION

### Table of contents

|                                                                                                                                |     |
|--------------------------------------------------------------------------------------------------------------------------------|-----|
| General experimental section                                                                                                   | S2  |
| Additional attempted synthetic strategies toward key intermediates <b>14/15</b> (Scheme S1)                                    | S3  |
| MS-data for modified ONs (Tables S1 and S2)                                                                                    | S4  |
| Representative thermal denaturation curves (Fig. S1)                                                                           | S5  |
| DNA-selectivity of <b>B1-B6</b> (Table S3)                                                                                     | S6  |
| Additional T <sub>m</sub> data and discussion concerning mismatched duplexes (Table S4)                                        | S7  |
| Representative absorption spectra involving <b>X</b> -modified ONs (Fig. S2)                                                   | S8  |
| Representative absorption spectra involving <b>Z</b> -modified ONs (Fig. S3)                                                   | S9  |
| Fluorescence emission spectra involving <b>X</b> -modified ONs (Fig. S4)                                                       | S10 |
| Fluorescence emission spectra involving <b>Y</b> -modified ONs (Fig. S5)                                                       | S11 |
| Fluorescence emission spectra of duplexes between <b>Y1-Y6</b> and DNA (Fig. S6)                                               | S12 |
| Fluorescence emission spectra involving <b>Z</b> -modified ONs (Fig. S7)                                                       | S13 |
| Fluorescence emission spectra of duplexes between <b>X/Y/Z</b> -modified ONs and matched/mismatched DNA targets (Figs. S8-S10) | S14 |
| NMR spectra of nucleosides <b>x-y</b>                                                                                          | S16 |

*General experimental section.* All solvents and reagents were obtained from commercial suppliers and used without further purification. Petroleum ether of the distillation range 60-80 °C was used. Anhydrous DMF and pyridine were used directly as obtained from commercial suppliers. Dichloromethane, 1,2-dichloroethane and *N,N'*-diisopropylethylamine were dried through storage over activated 4Å molecular sieves. Reactions were conducted under an atmosphere of argon whenever anhydrous solvents were used. All reactions were monitored by thin-layer chromatography (TLC) using silica gel coated plates with fluorescence indicator (SiO<sub>2</sub>-60, F-254), which were visualized (a) under UV light, (b) by dipping in 5% concd. sulfuric acid in absolute ethanol (v/v) followed by heating, or (c) by dipping in a solution of molybdate phosphoric acid (12.5 g/L) and cerium(IV)sulfate (5 g/L) followed by heating. Silica gel column chromatography using moderate pressure (pressure ball) was performed using Silica gel 60 (particle size 0.040-0.063 mm). Evaporation of solvents was carried out under reduced pressure with a temperature not exceeding 45 °C. After column chromatography, appropriate fractions were pooled, evaporated, and dried at high vacuum for at least 8h to give products in high purity (>95% by 1D NMR techniques), unless stated otherwise. <sup>1</sup>H NMR and/or <sup>13</sup>C NMR ascertained sample purity. <sup>1</sup>H NMR and <sup>13</sup>C NMR spectra were recorded at either 500/125 MHz, or 300/75.5 MHz as specified. Chemical shifts are reported in parts per million (ppm) relative to tetramethylsilane or deuterated solvent as the internal standard ( $\delta_{\text{H}}$ : CDCl<sub>3</sub> 7.26 ppm, DMSO-*d*<sub>6</sub> 2.50 ppm;  $\delta_{\text{C}}$ : CDCl<sub>3</sub> 77.00 ppm, DMSO-*d*<sub>6</sub> 39.43 ppm). Exchangeable (ex) protons were identified through disappearance of signals upon D<sub>2</sub>O addition. Assignments of NMR spectra are based on COSY, HSQC and DEPT and follow standard carbohydrate/nucleoside nomenclature. The carbon atom of C4 substituents is numbered C5" in nucleoside derivatives. Similar conventions apply for the corresponding hydrogen atoms. Quaternary carbons were not assigned

in  $^{13}\text{C}$  NMR but their presence was verified through absence of signals in HSQC and DEPT. MALDI-HRMS were recorded in positive ion mode on a mass spectrometer using 2,5-dihydroxybenzoic acid or 3-hydroxypicolinic acid as a matrix and mixture of polyethylene glycol (PEG 600) and (PEG 1000) as internal calibration standards. ESI-HRMS were recorded in positive ion mode on a Q-TOF mass spectrometer using NaCl in MeCN:H<sub>2</sub>O and PEG 600 and PEG 1000 as internal calibration standards.

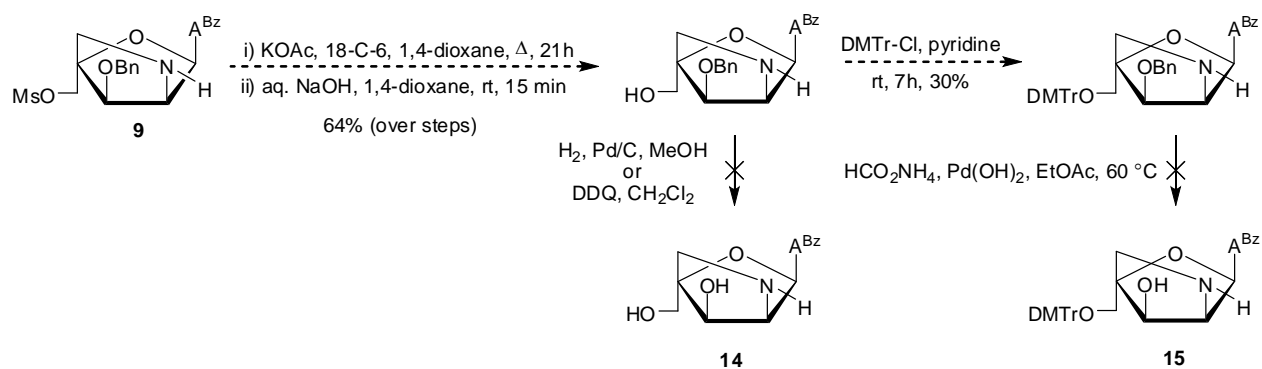

**Scheme S1.** Additional attempted synthetic strategies toward key intermediates **14/15**. 18-C-6: 18-crown-6.

**Table S1.** MS-data for X/Y-modified ONs used in the current study.

| ONs                   | Sequence                              | Calc. $m/z$ [M-H] | Found $m/z$ [M-H] |
|-----------------------|---------------------------------------|-------------------|-------------------|
| <b>X1</b>             | 5'-GTG <u>X</u> TA TGC                | 2995              | 2995              |
| <b>X2</b>             | 5'-GTG AT <u>X</u> TGC                | 2995              | 2993              |
| <b>X3</b>             | 5'-GTG <u>X</u> <u>T</u> X TGC        | 3236              | 3236              |
| <b>X4</b>             | 3'-CAC T <u>X</u> T ACG               | 2924              | 2923              |
| <b>X5</b>             | 3'-CAC TAT <u>X</u> CG                | 2924              | 2923              |
| <b>X6</b>             | 3'-CAC T <u>X</u> T <u>X</u> CG       | 3165              | 3163              |
| <b>Y1<sup>a</sup></b> | 5'-GTG <u>Y</u> TA TGC                | 3009              | 3008              |
| <b>Y2</b>             | 5'-GTG AT <u>Y</u> TGC                | 3009              | 3009              |
| <b>Y3</b>             | 5'-GTG <u>Y</u> <u>T</u> <u>Y</u> TGC | 3264              | 3264              |
| <b>Y4</b>             | 3'-CAC T <u>Y</u> T ACG               | 2937              | 2937              |
| <b>Y5</b>             | 3'-CAC TAT <u>Y</u> CG                | 2937              | 2936              |
| <b>Y6</b>             | 3'-CAC T <u>Y</u> T <u>Y</u> CG       | 3192              | 3192              |
| <b>Y7<sup>b</sup></b> | 3'-CAC T <u>Y</u> A ACG               | 2947              | 2948              |
| <b>Y8</b>             | 3'-CAC T <u>Y</u> C ACG               | 2923              | 2923              |
| <b>Y9<sup>c</sup></b> | 3'-CAC T <u>Y</u> G ACG               | 2963              | 2962              |

Purity: <sup>a</sup>70%, <sup>b</sup>84% <sup>c</sup>75% purity.

**Table S2.** MS-data for X/Y-modified ONs used in the current study.

| ONs                   | Sequence                              | Calc. $m/z$ [M] | Found $m/z$ [M+H] |
|-----------------------|---------------------------------------|-----------------|-------------------|
| <b>W1<sup>a</sup></b> | 5'-GTG <u>W</u> TA TGC                | 2780            | 2781              |
| <b>W2<sup>b</sup></b> | 5'-GTG AT <u>W</u> TGC                | 2780            | 2781              |
| <b>W3<sup>c</sup></b> | 5'-GTG <u>W</u> <u>T</u> <u>W</u> TGC | 2807            | 2808              |
| <b>W4<sup>d</sup></b> | 3'-CAC T <u>W</u> T ACG               | 2709            | 2710              |
| <b>W5<sup>e</sup></b> | 3'-CAC TAT <u>W</u> CG                | 2709            | 2710              |
| <b>W6<sup>f</sup></b> | 3'-CAC T <u>W</u> T <u>W</u> CG       | 2736            | 2737              |
| <b>Z1</b>             | 5'-GTG <u>Z</u> TA TGC                | 3022            | 3023              |
| <b>Z2</b>             | 5'-GTG AT <u>Z</u> TGC                | 3022            | 3023              |
| <b>Z3</b>             | 5'-GTG <u>Z</u> <u>T</u> <u>Z</u> TGC | 3291            | 3292              |
| <b>Z4</b>             | 3'-CAC T <u>Z</u> T ACG               | 2951            | 2952              |
| <b>Z5</b>             | 3'-CAC TAT <u>Z</u> CG                | 2951            | 2952              |
| <b>Z6</b>             | 3'-CAC T <u>Z</u> T <u>Z</u> CG       | 3220            | 3221              |

Purity: <sup>a</sup>72%, <sup>b</sup>58%, <sup>c</sup>73%, <sup>d</sup>71%, <sup>e</sup>63%, <sup>f</sup>58% - we hypothesize that the low purities are due to the presence of 'skippers' (i.e., ONs without the W monomer), which arose due to inadequate capping during fabrication of W-modified ONs.



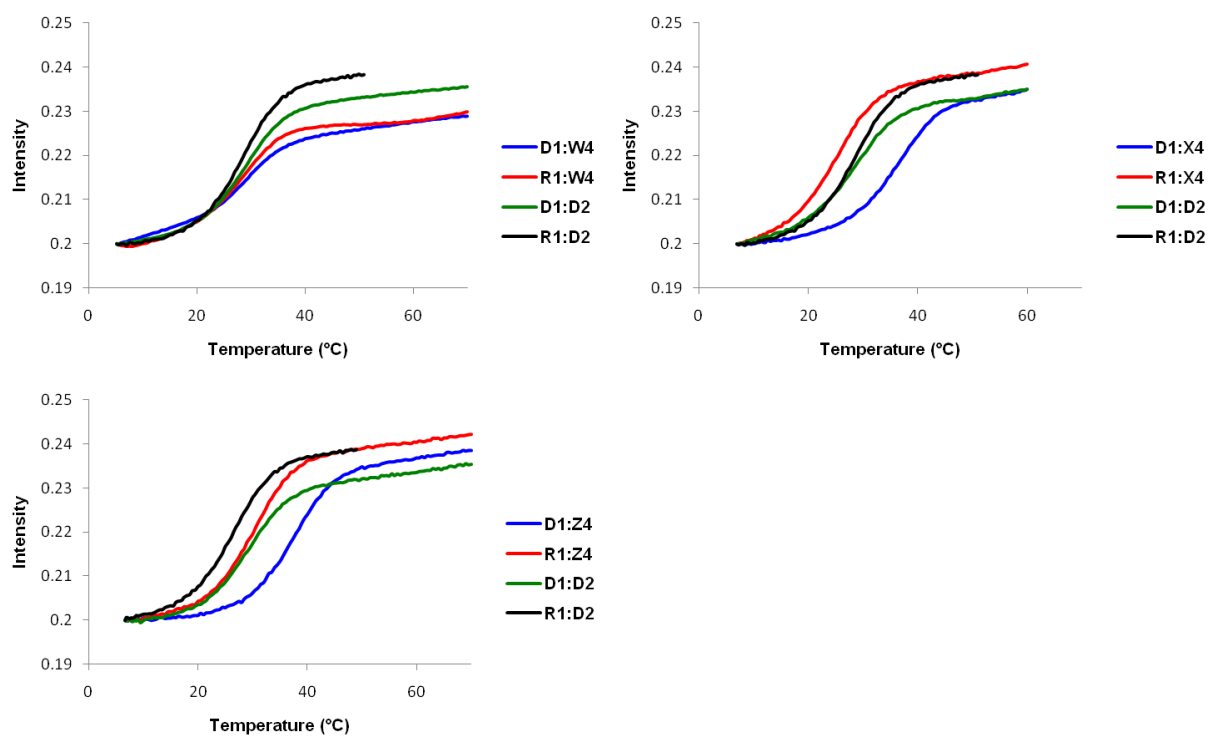

**Figure S1.** Representative thermal denaturation curves for modified and reference duplexes.

**Table S3.** DNA-selectivity of **B1-B6**.<sup>a</sup>

| <b>ON</b> | <b>Sequence</b>                 | <b>B =</b> | $\Delta\Delta T_m$ (DNA-RNA)/°C |          |          |          |
|-----------|---------------------------------|------------|---------------------------------|----------|----------|----------|
|           |                                 |            | <b>W</b>                        | <b>X</b> | <b>Y</b> | <b>Z</b> |
| <b>B1</b> | 5'-GTG <u>B</u> TA TGC          |            | -3.0                            | +6.0     | +9.5     | +2.5     |
| <b>B2</b> | 5'-GTG AT <u>B</u> TGC          |            | -2.0                            | +6.0     | +9.0     | +3.0     |
| <b>B3</b> | 5'-GTG <u>B</u> T <u>B</u> TGC  |            | -4.0                            | +6.5     | +9.0     | +5.0     |
| <b>B4</b> | 3'-CAC T <u>B</u> T ACG         |            | -4.5                            | +7.0     | +9.0     | +1.0     |
| <b>B5</b> | 3'-CAC TAT <u>B</u> CG          |            | -7.0                            | +2.0     | +5.5     | -2.0     |
| <b>B6</b> | 3'-CAC T <u>B</u> T <u>B</u> CG |            | -9.0                            | +5.0     | +6.5     | ±0.0     |

<sup>a</sup> DNA selectivity defined as  $\Delta\Delta T_m$  (DNA-RNA) =  $\Delta T_m$  (vs DNA) -  $\Delta T_m$  (vs RNA).

*Additional discussion – mismatch discrimination of B3-series ONs.* The specificity of ONs with two modifications positioned as next-nearest neighbors (**B3** series) was evaluated against DNA targets with a single central mismatched nucleotide opposite of the central thymidine (Table S4). **X3** and **Y3** display very poor binding specificity, whereas **Z3** displays binding specificity that is comparable to unmodified reference strand **D1**.

**Table S4.** Discrimination of mismatched DNA targets by **B3**-series and reference ONs.<sup>a</sup>

| ON        | Sequence                       | <b>B</b> = | DNA : 3'-CAC <b>T</b> BT ACG |                             |       |       |
|-----------|--------------------------------|------------|------------------------------|-----------------------------|-------|-------|
|           |                                |            | $T_m/^\circ\text{C}$         | $\Delta T_m/^\circ\text{C}$ |       |       |
|           |                                |            | A                            | C                           | G     | T     |
| <b>D1</b> | 5'-GTG ATA TGC                 |            | <b>27.5</b>                  | -16.5                       | -9.5  | -17.0 |
| <b>X3</b> | 5'-GTG <u>X</u> T <u>X</u> TGC |            | <b>32.5</b>                  | +2.0                        | +0.5  | +2.0  |
| <b>Y3</b> | 5'-GTG <u>Y</u> T <u>Y</u> TGC |            | <b>41.0</b>                  | -5.0                        | -2.0  | -2.0  |
| <b>Z3</b> | 5'-GTG <u>Z</u> T <u>Z</u> TGC |            | <b>43.5</b>                  | -14.5                       | -11.5 | -9.5  |

<sup>a</sup> For conditions of thermal denaturation experiments, see Table 1.  $T_m$ 's of fully matched duplexes are shown in bold.  $\Delta T_m$  = change in  $T_m$  relative to fully matched DNA:DNA duplex.

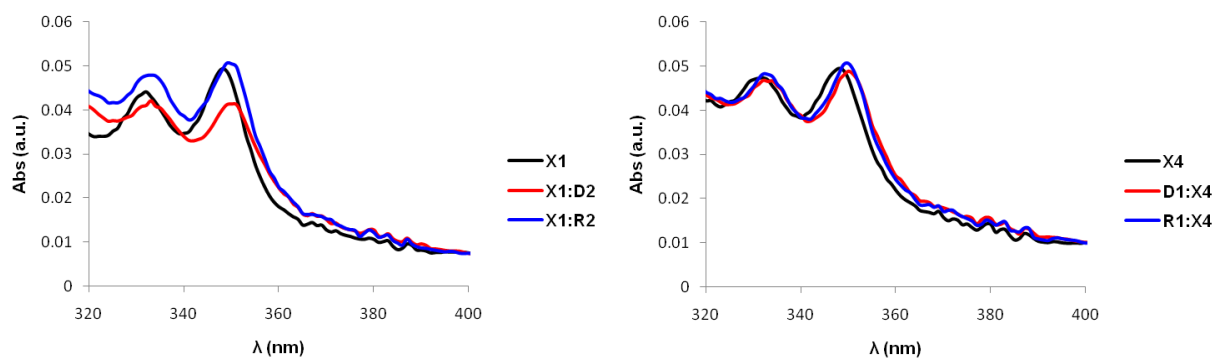

**Figure S2.** Representative absorption spectra of X-modified ONs and the corresponding duplexes with complementary DNA/RNA.

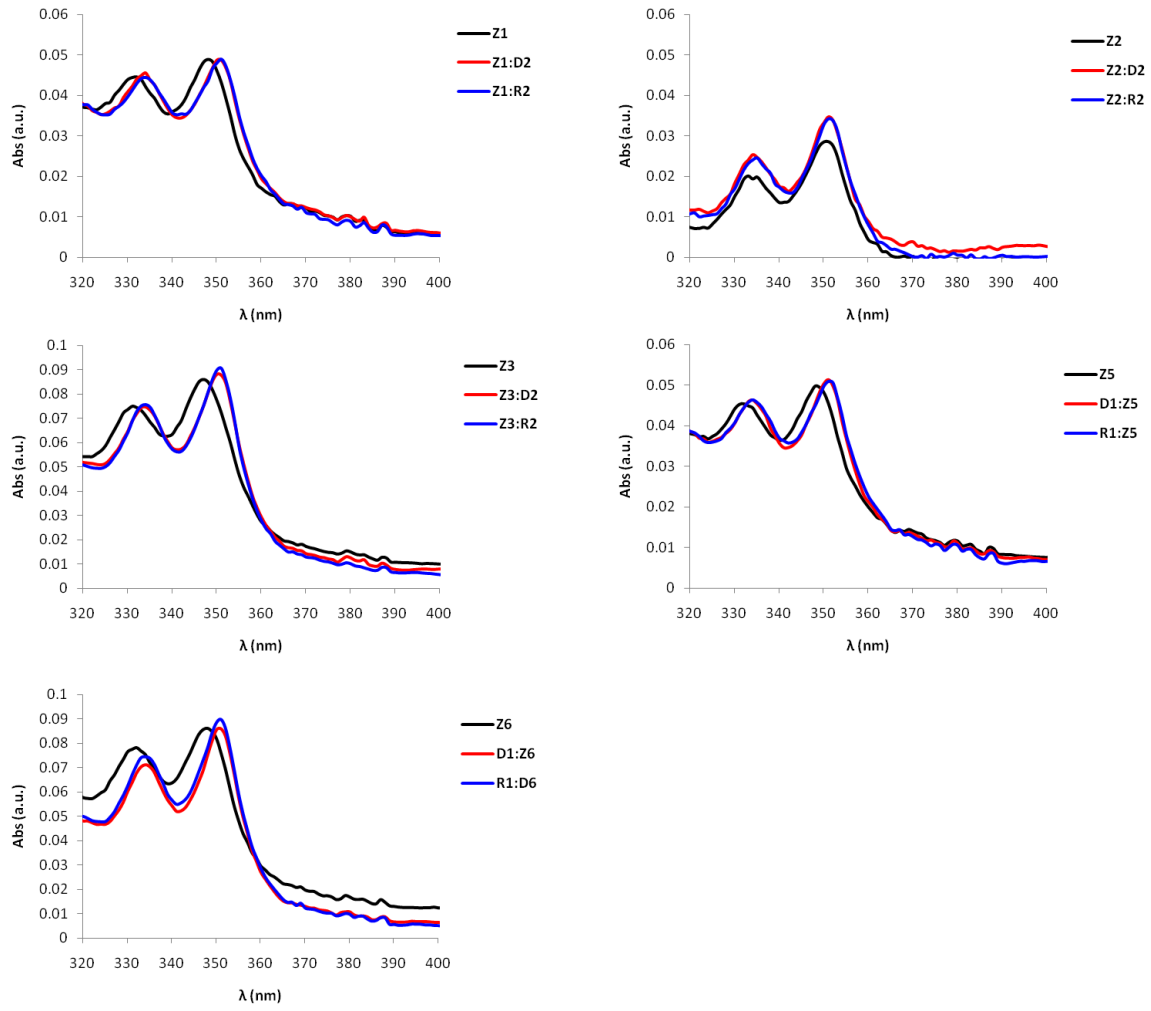

**Figure S3.** Representative absorption spectra of **Z**-modified ONs and the corresponding duplexes with complementary DNA/RNA.

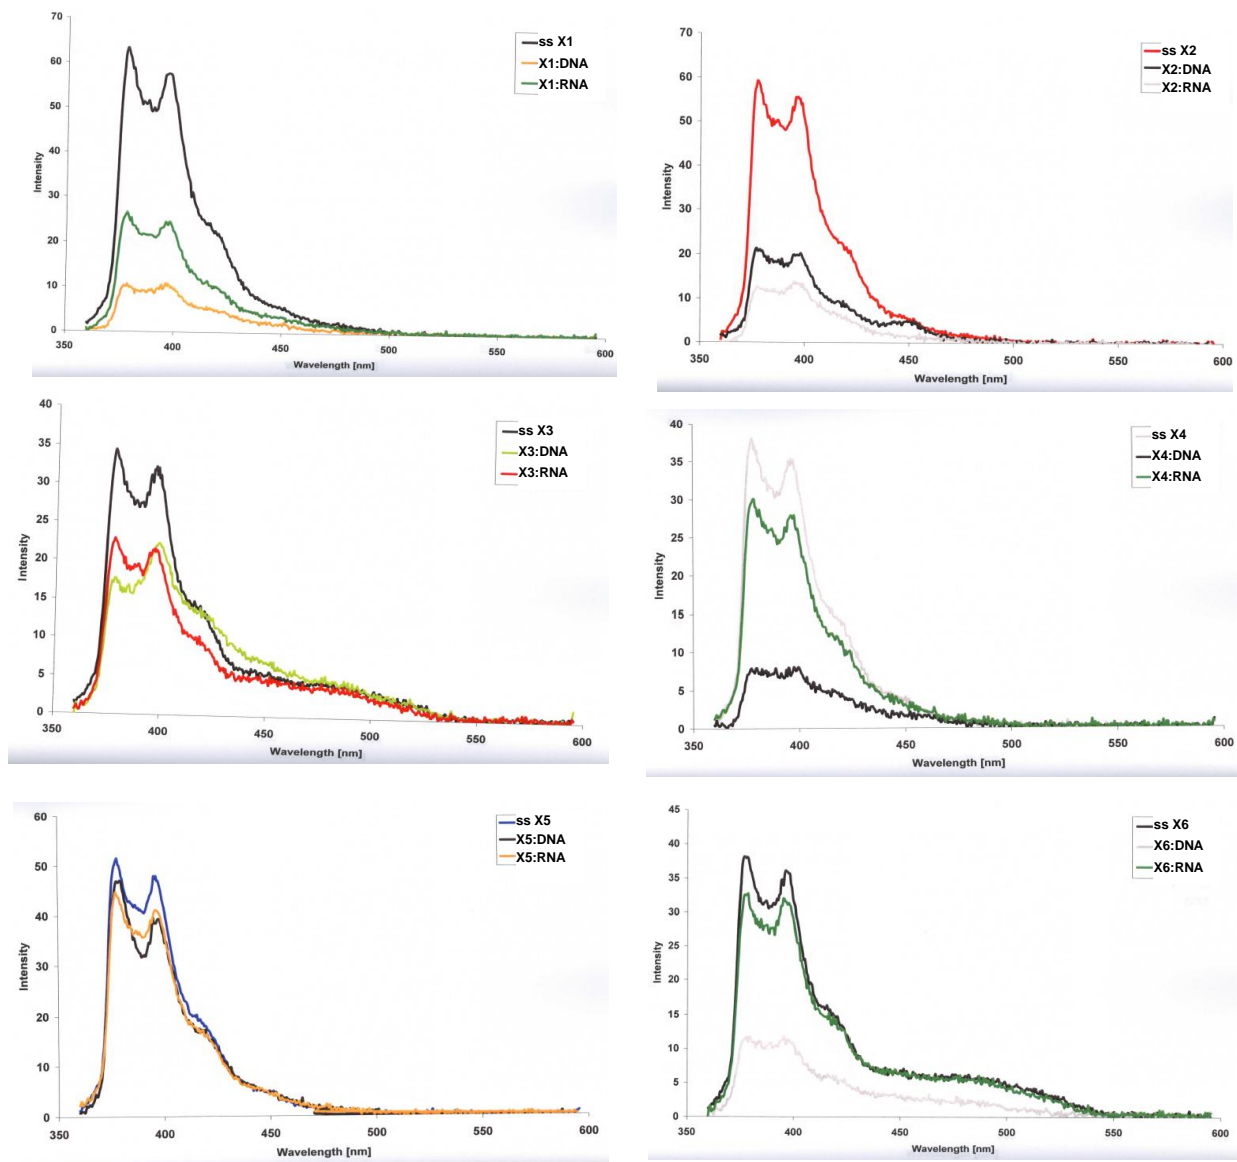

**Figure S4.** Steady-state fluorescence emission spectra of **X1-X6** in the presence of absence of complementary DNA/RNA.  $T_{\text{exp}} = 5\text{ }^{\circ}\text{C}$ ;  $\lambda_{\text{ex}} = 350\text{ nm}$ ; each ON used at  $1\text{ }\mu\text{M}$  concentration in  $T_m$  buffer.

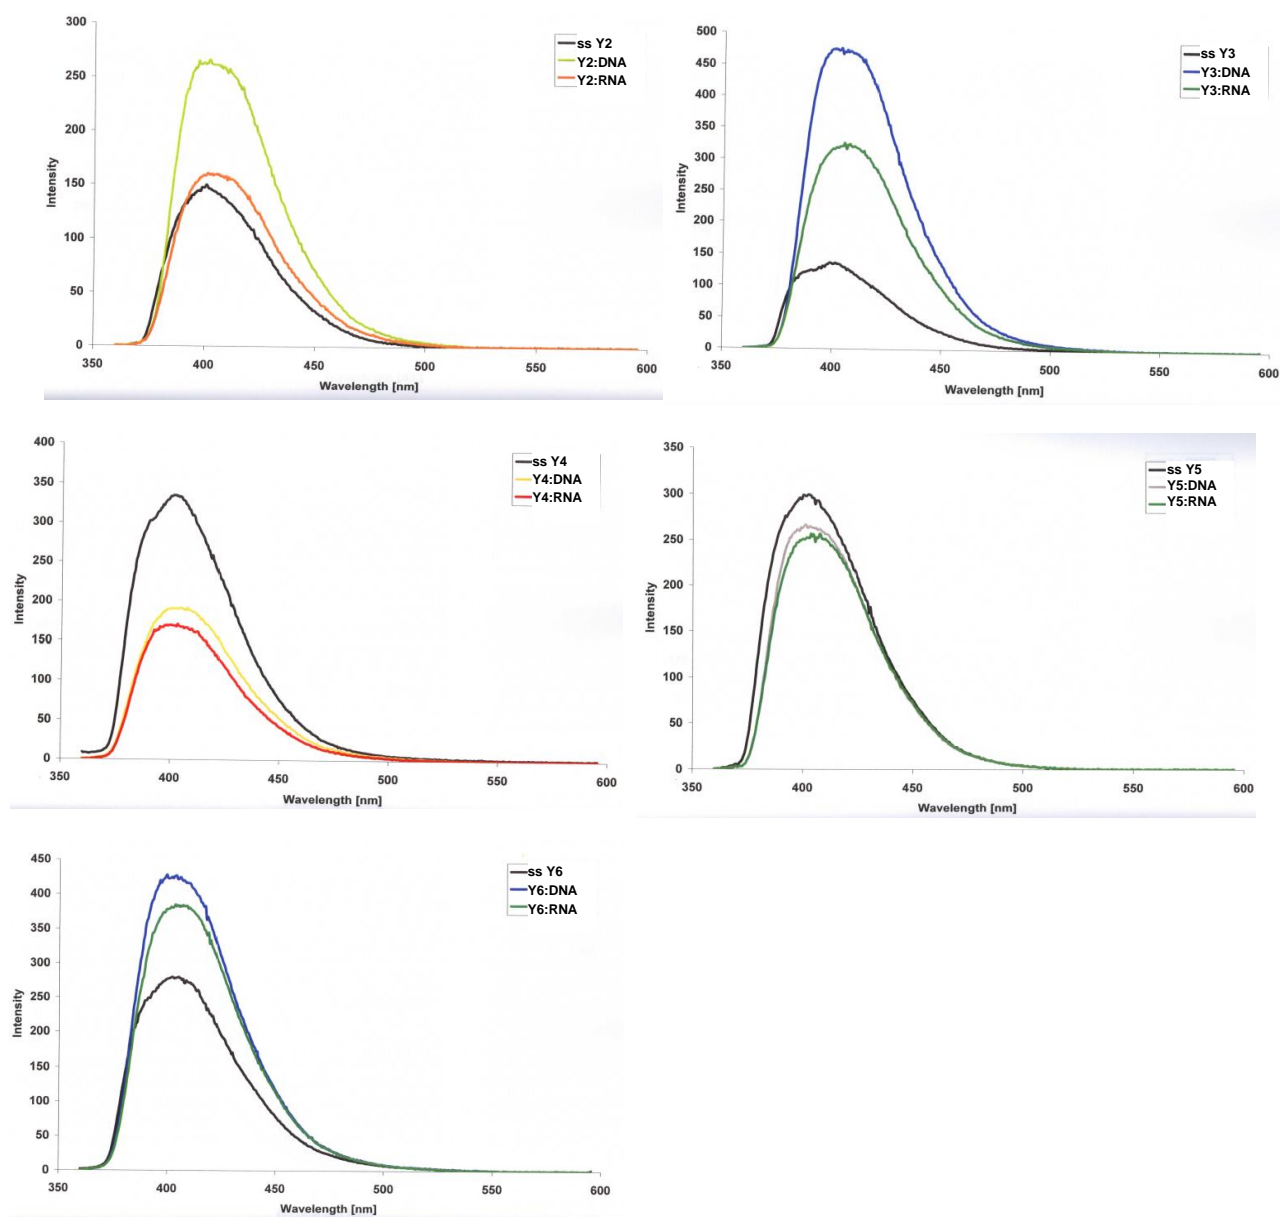

**Figure S5.** Steady-state fluorescence emission spectra of **Y1-Y6** in the presence and absence of complementary DNA/RNA.  $T_{\text{exp}} = 5\text{ }^{\circ}\text{C}$ ;  $\lambda_{\text{ex}} = 350\text{ nm}$ ; each ON used at  $0.15\text{ }\mu\text{M}$  concentration in  $T_{\text{m}}$  buffer.

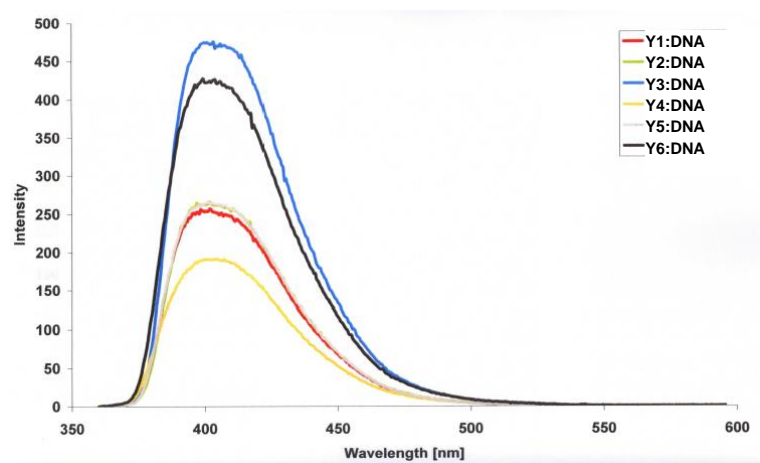

**Figure S6.** Steady-state fluorescence emission spectra of duplexes between **Y1-Y6** and complementary DNA. The spectra for **Y2:DNA** and **Y5:DNA** are overlapping.  $T_{\text{exp}} = 5\text{ }^{\circ}\text{C}$ ;  $\lambda_{\text{ex}} = 350\text{ nm}$ ; each ON used at  $0.15\text{ }\mu\text{M}$  concentration in  $T_m$  buffer.



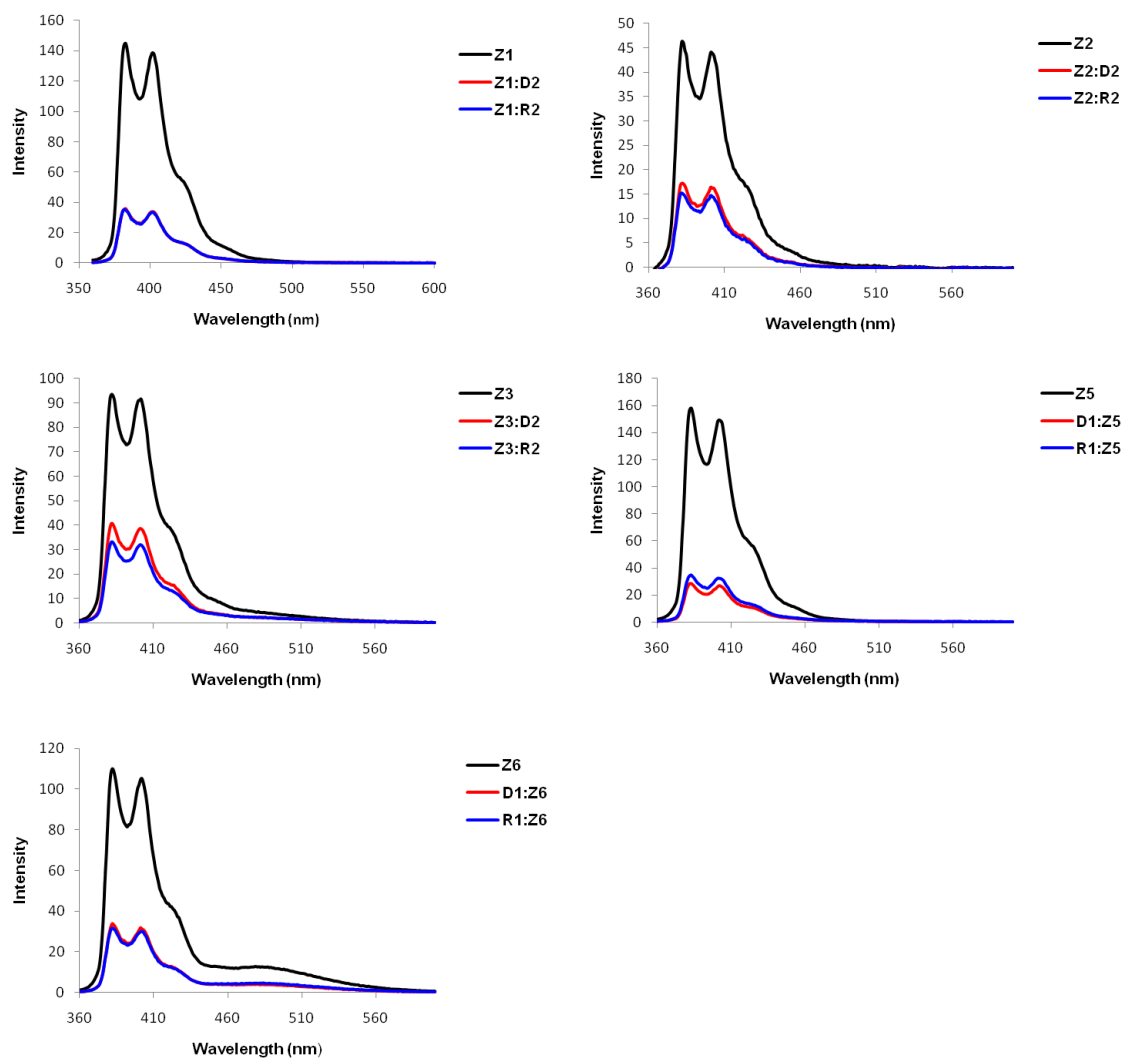

**Figure S7.** Steady-state fluorescence emission spectra of **Z**-modified ONs in the presence or absence of complementary DNA/RNA.  $T_{\text{exp}} = 5 \text{ }^{\circ}\text{C}$ ;  $\lambda_{\text{ex}} = 350 \text{ nm}$ ; each ON used at  $1 \text{ } \mu\text{M}$  concentration in  $T_{\text{m}}$  buffer.

*Additional discussion – mismatch discrimination via fluorescence.* Probes **X4/Y4/Z4** were evaluated as probes for potential discrimination of single nucleotide polymorphisms (SNPs). Thus, these probes were hybridized with DNA strands with mismatched nucleotides opposite of the **X-Z** monomers. Although differences in fluorescence emission are observed, the differences are too small to be practically useful (Fig. S8-S10).

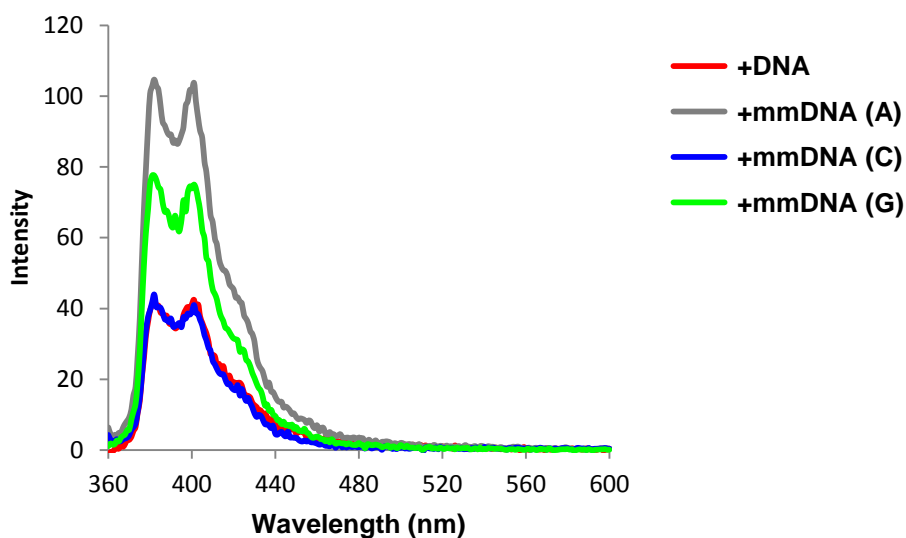

**Figure S8.** Steady-state fluorescence emission spectra of duplexes between **X4** and matched or mismatched DNA targets (mismatched nucleotide listed in parenthesis). Spectra were recorded at 5 °C using  $\lambda_{\text{ex}} = 350$  nm and 1  $\mu\text{M}$  concentration of each ON.

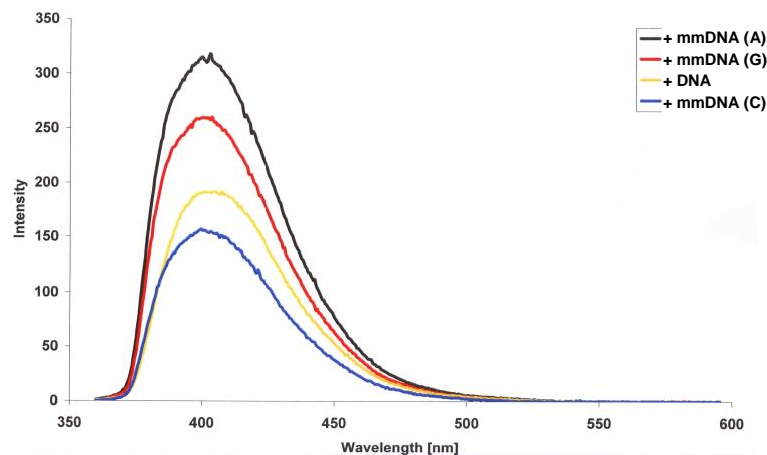

**Figure S9.** Steady-state fluorescence emission spectra of duplexes between **Y4** and matched or mismatched DNA targets (mismatched nucleotide listed in parenthesis). Spectra were recorded at 5 °C using  $\lambda_{\text{ex}} = 350$  nm and 0.15  $\mu\text{M}$  concentration of each ON.

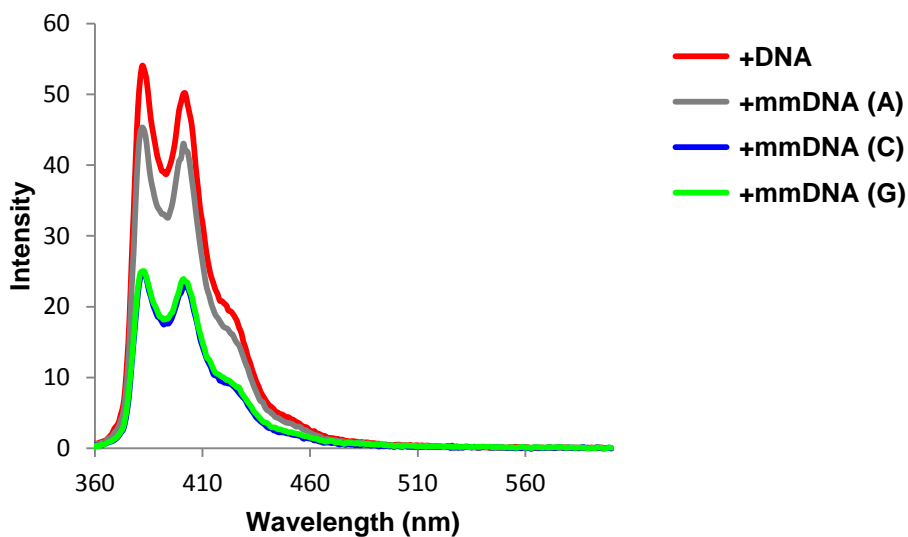

**Figure S10.** Steady-state fluorescence emission spectra of duplexes between **Z4** and matched or mismatched DNA targets (mismatched nucleotide listed in parenthesis). Spectra were recorded at 5 °C using  $\lambda_{\text{ex}} = 350$  nm and 1  $\mu\text{M}$  concentration of each ON.

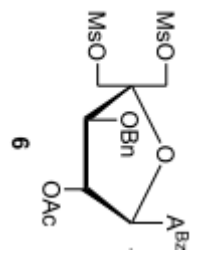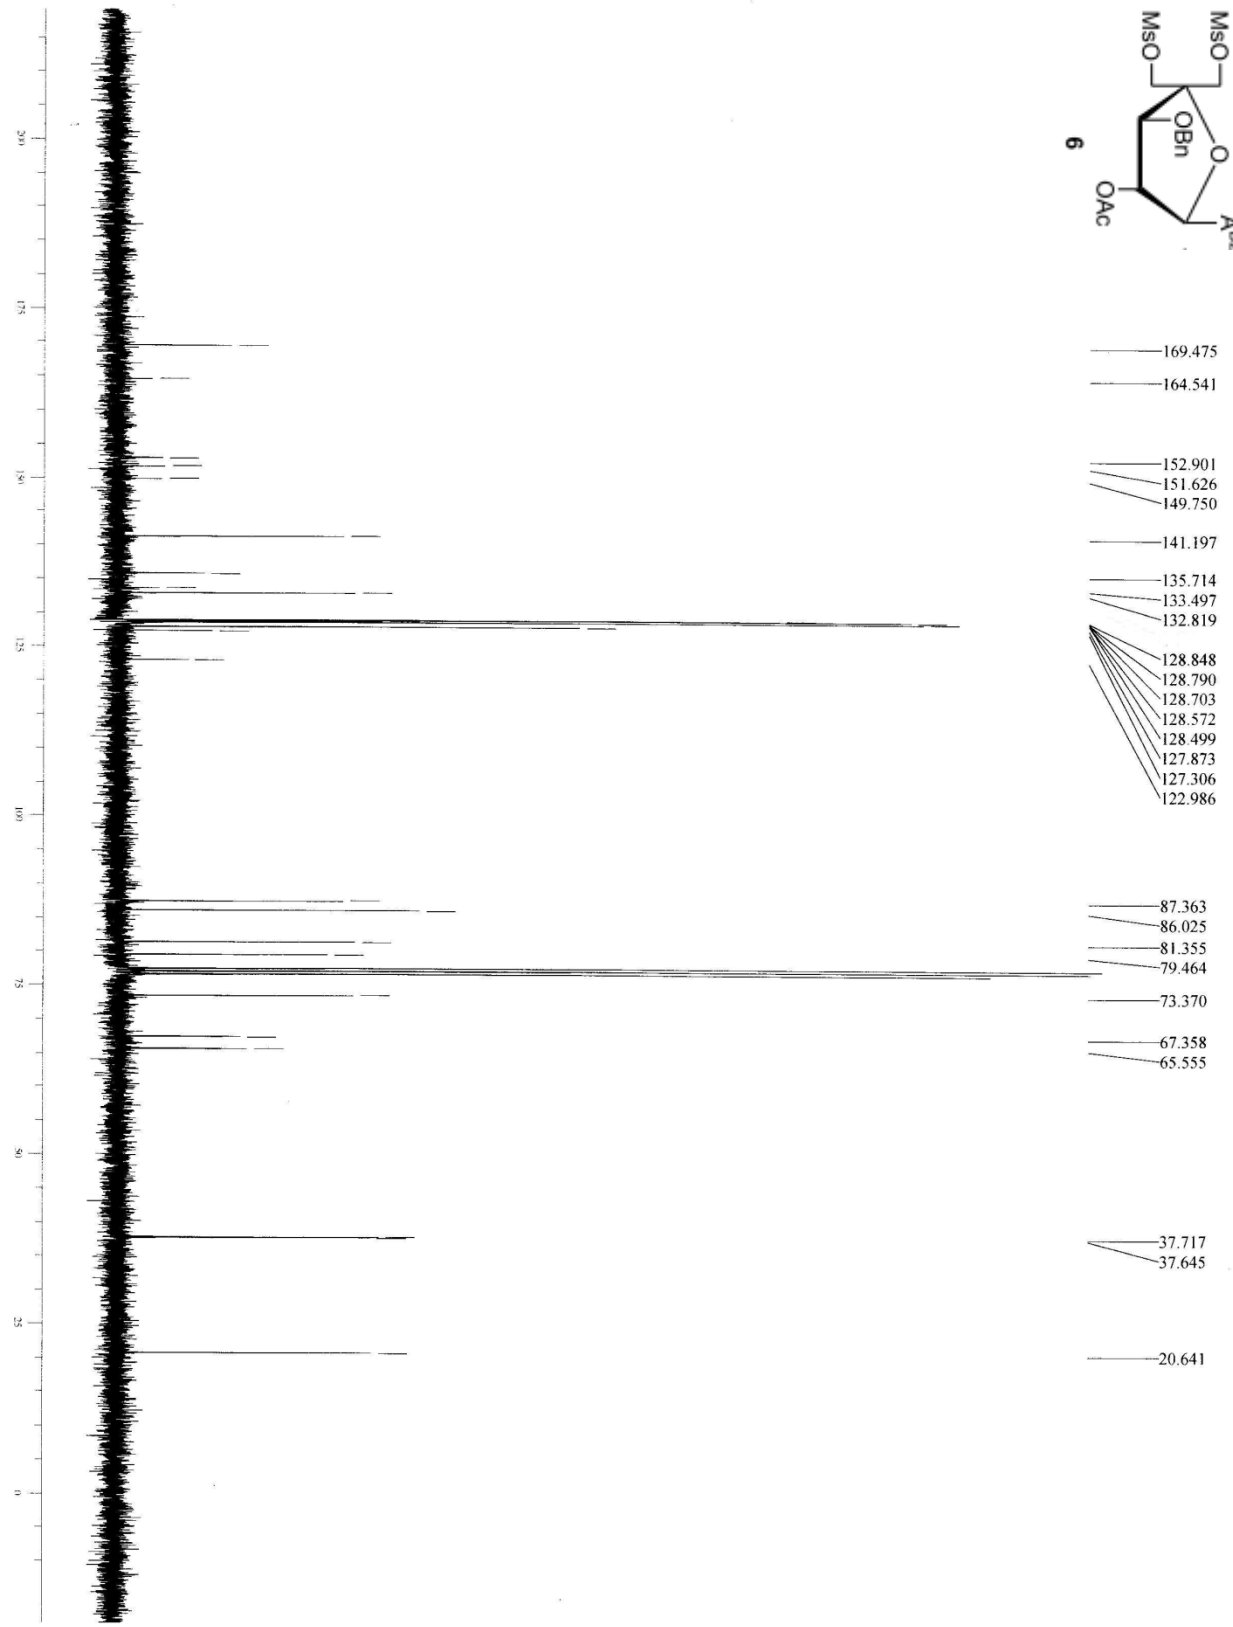

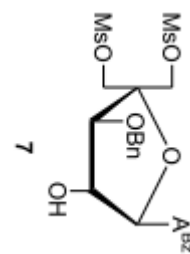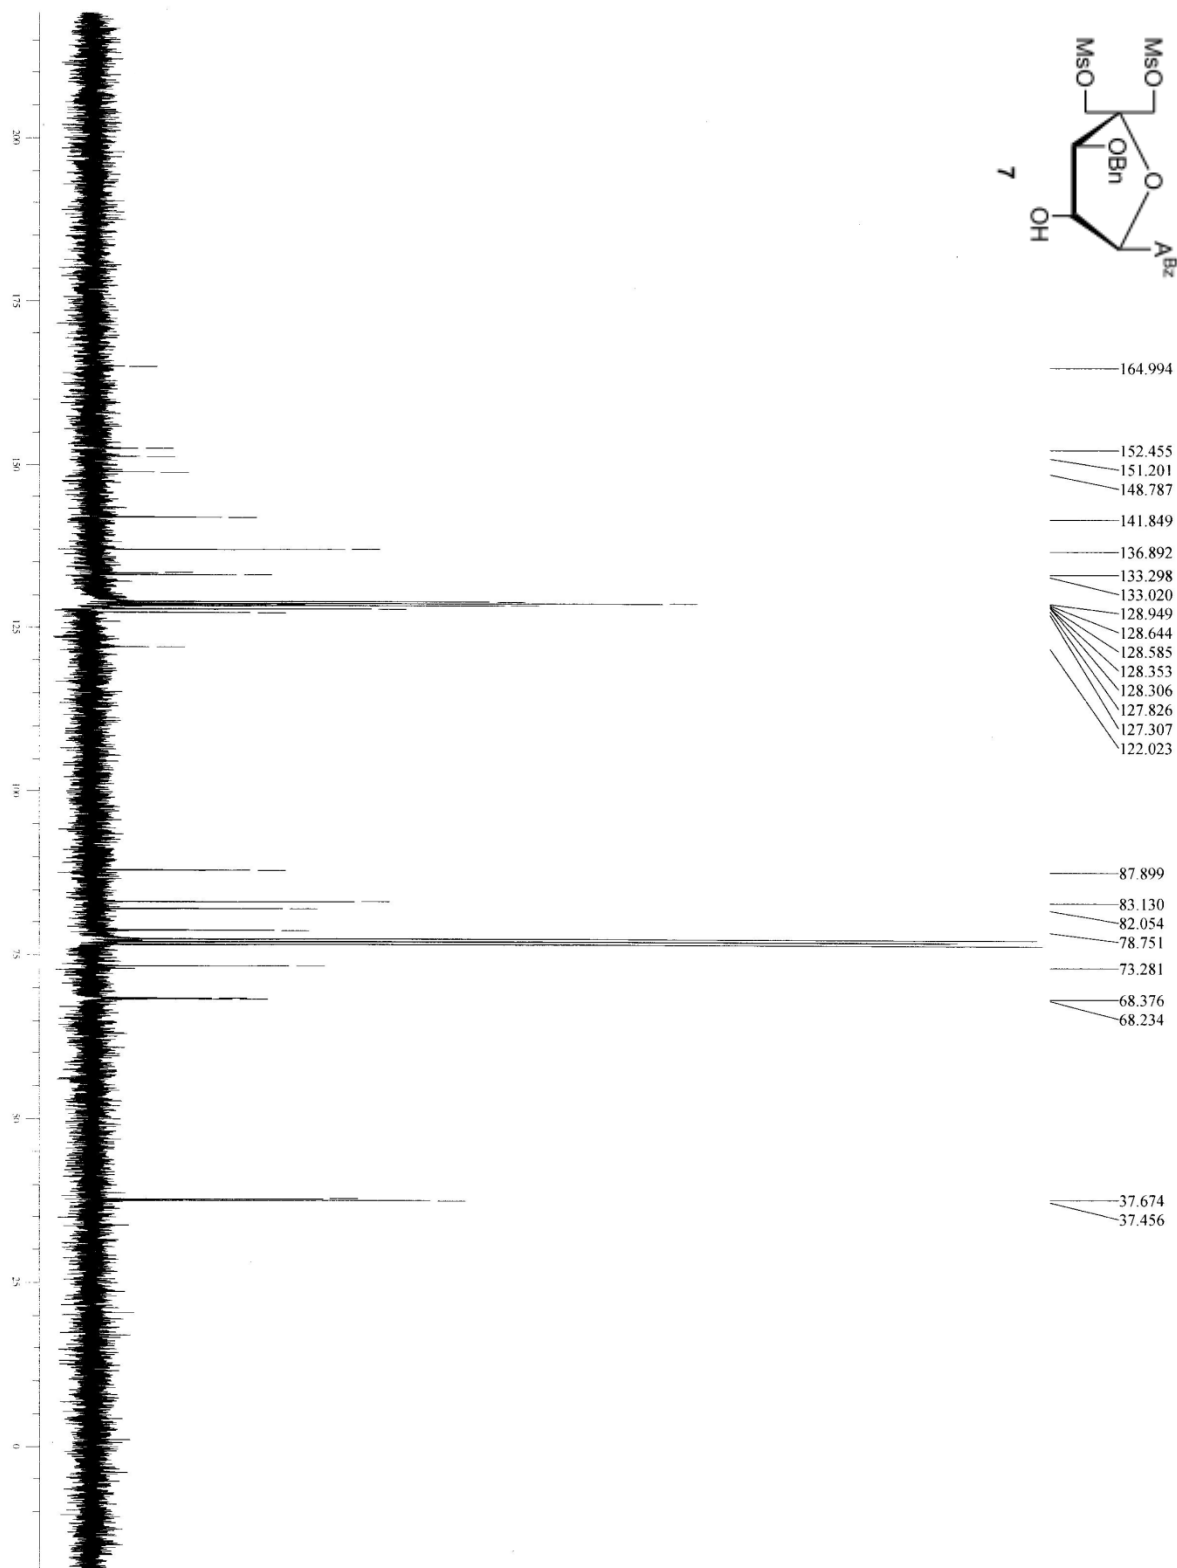

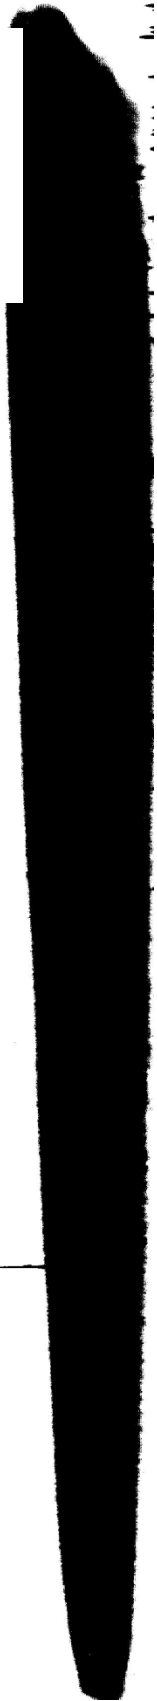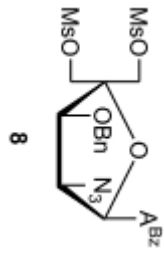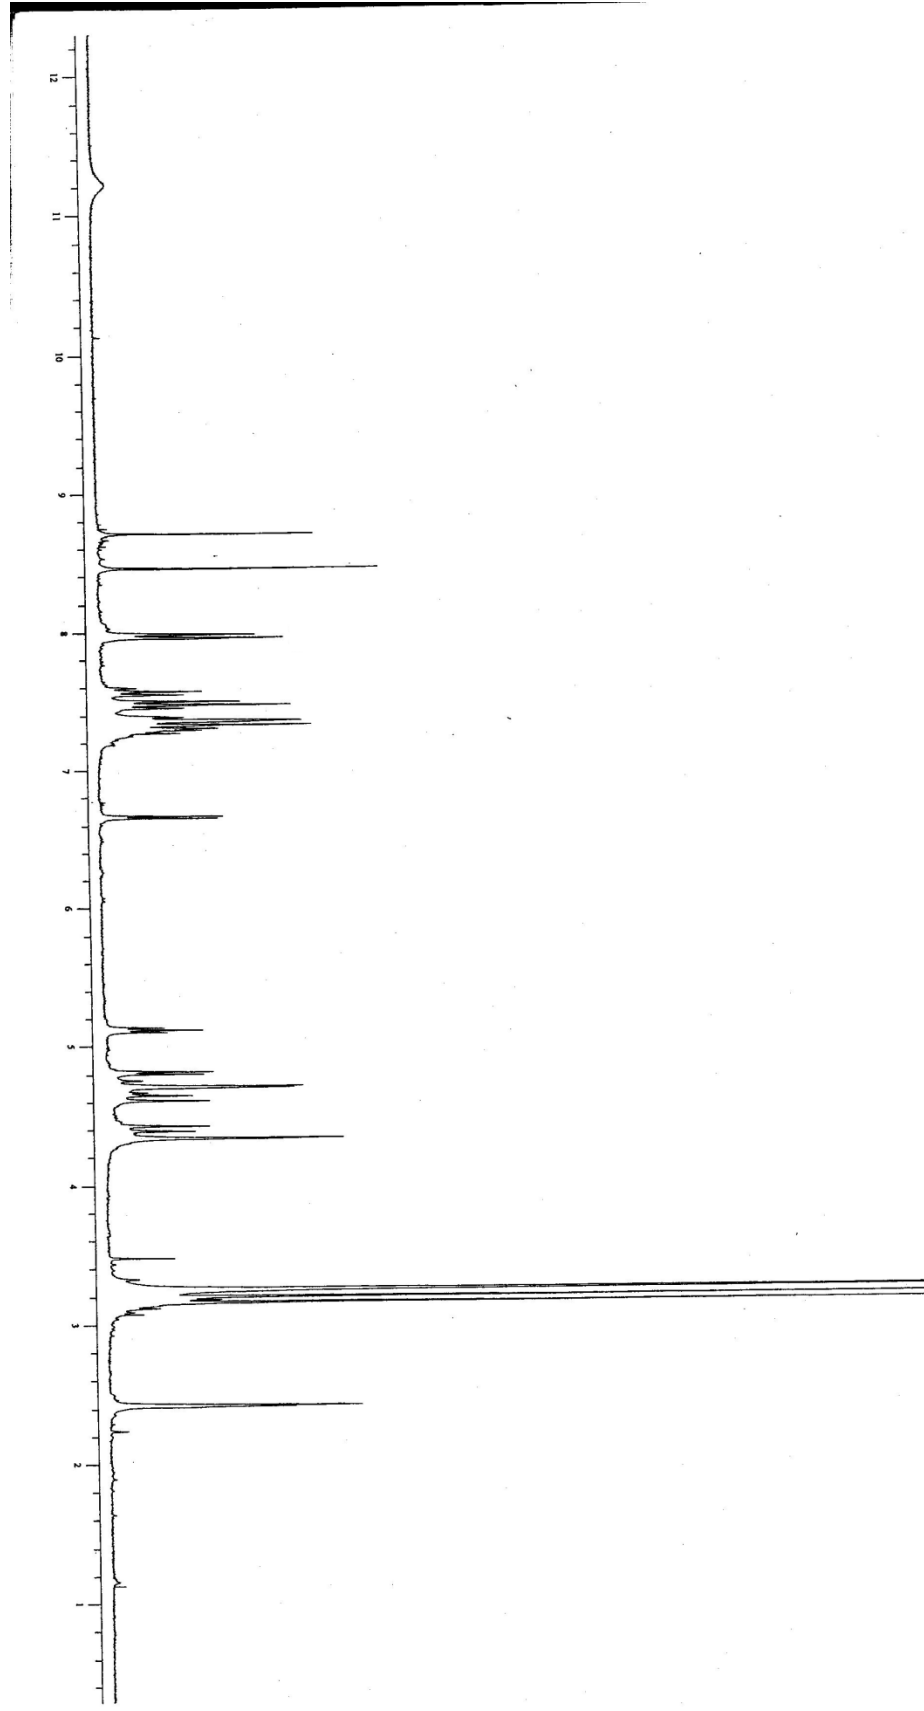

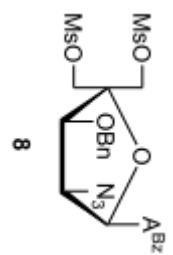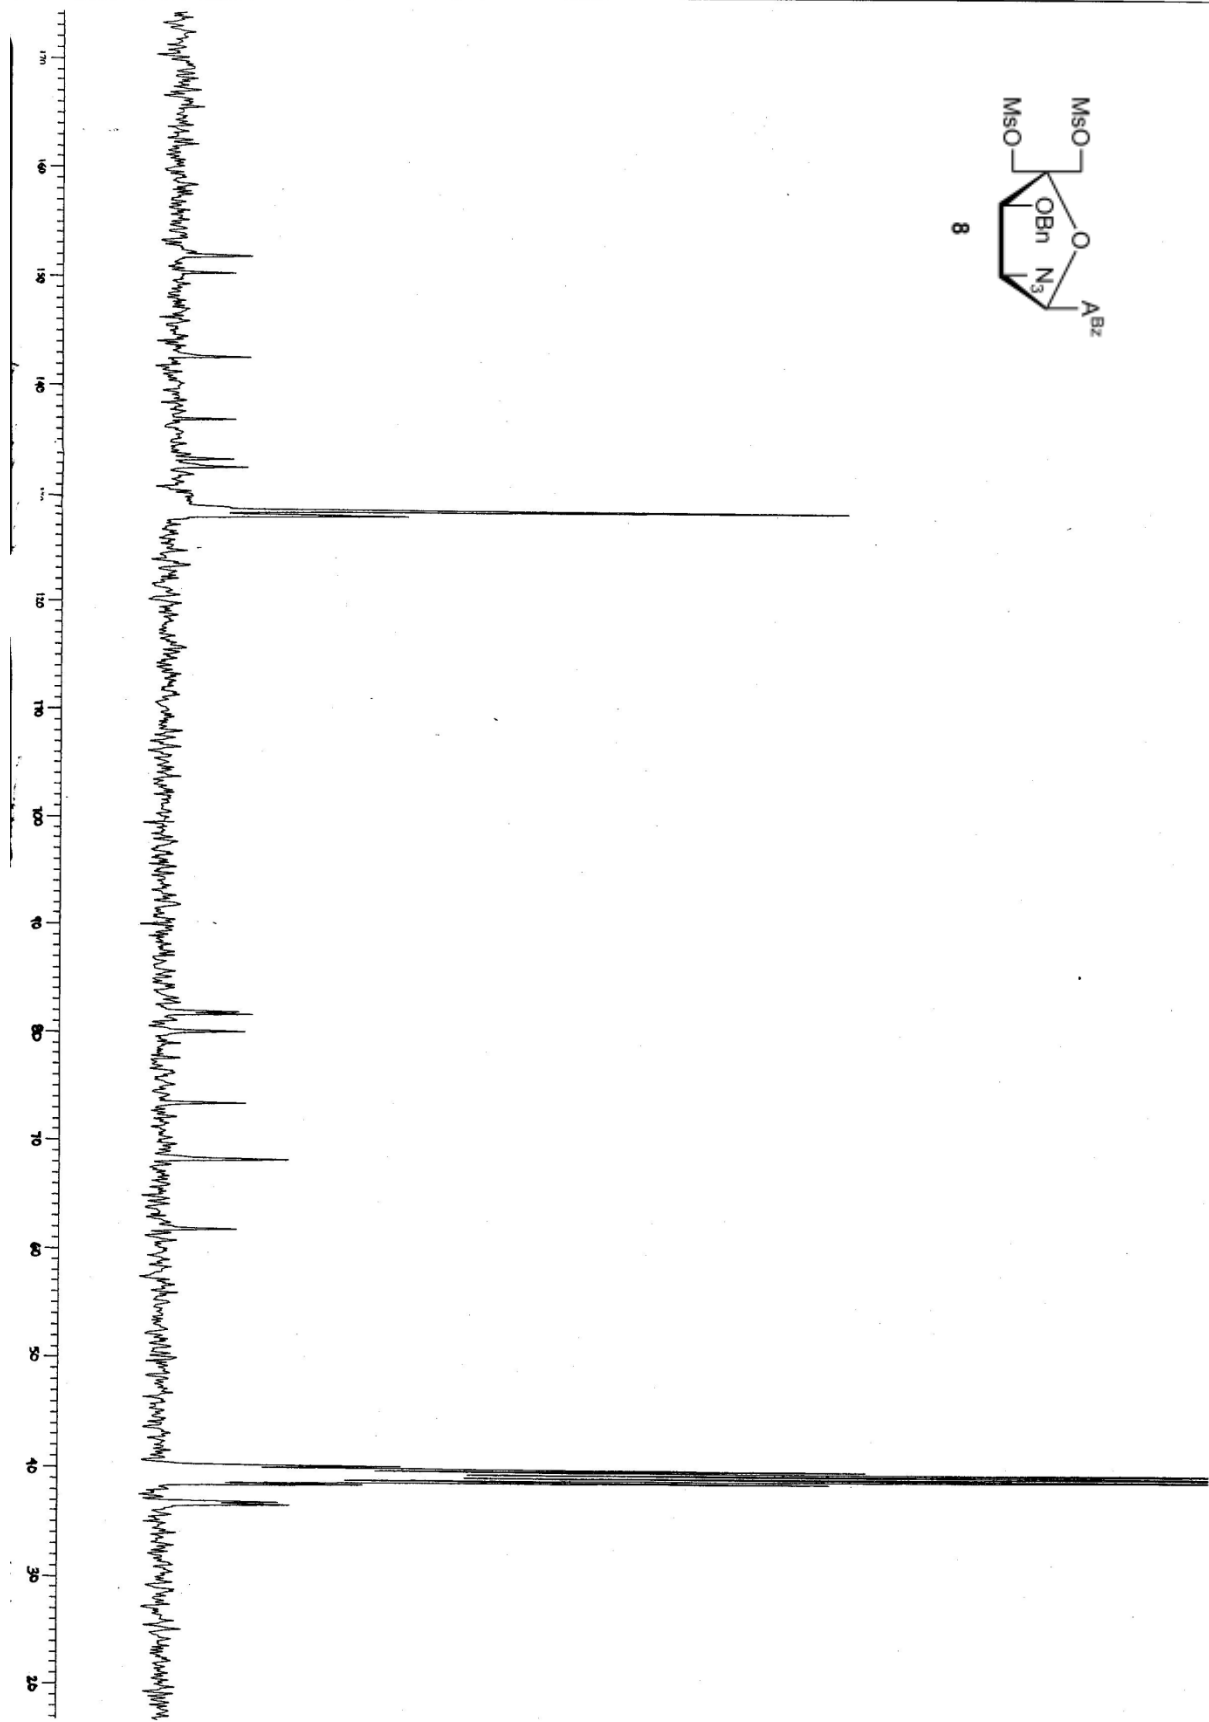

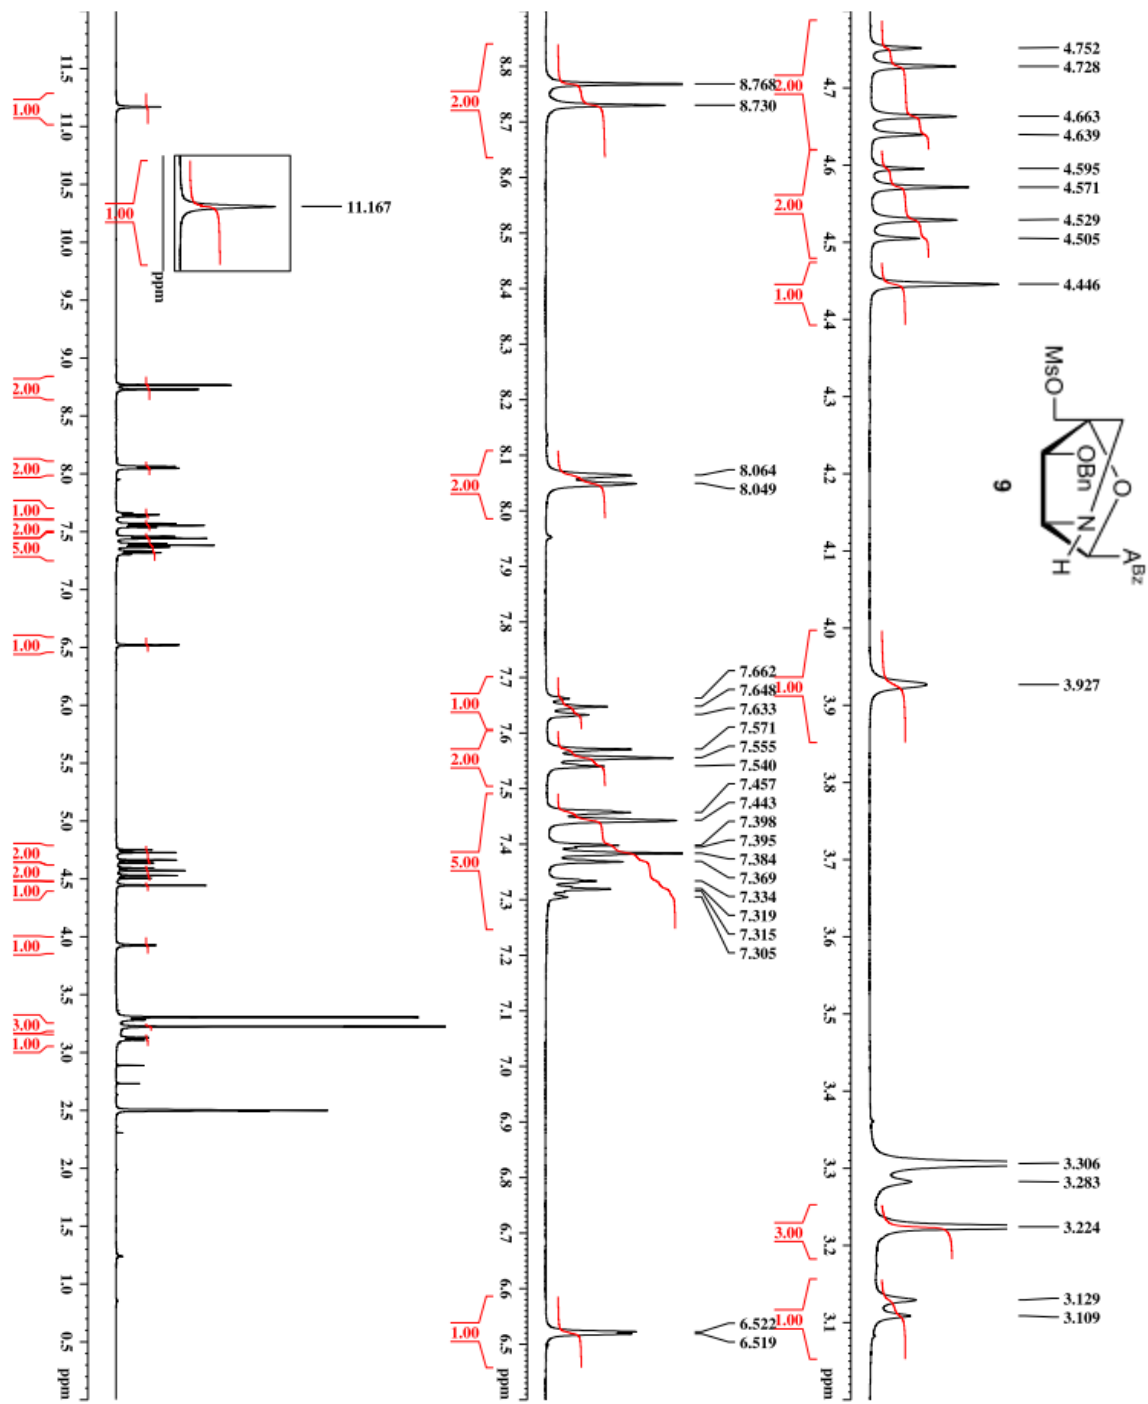



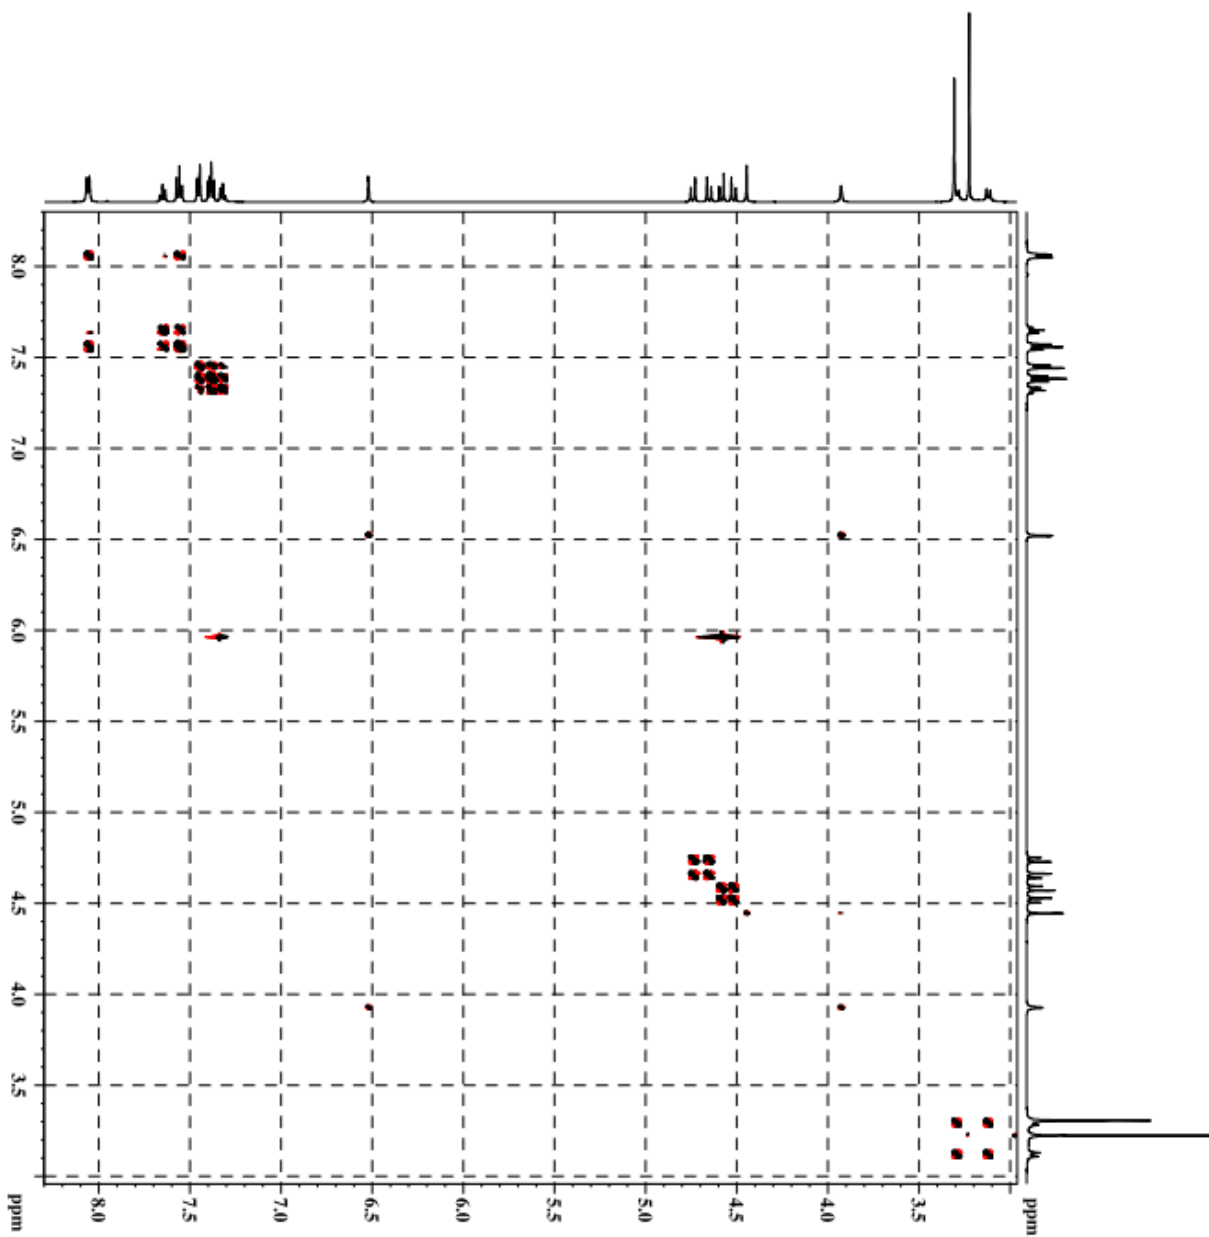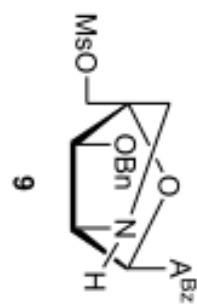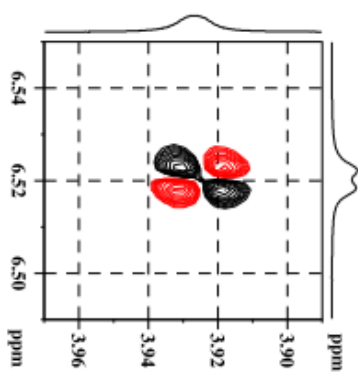

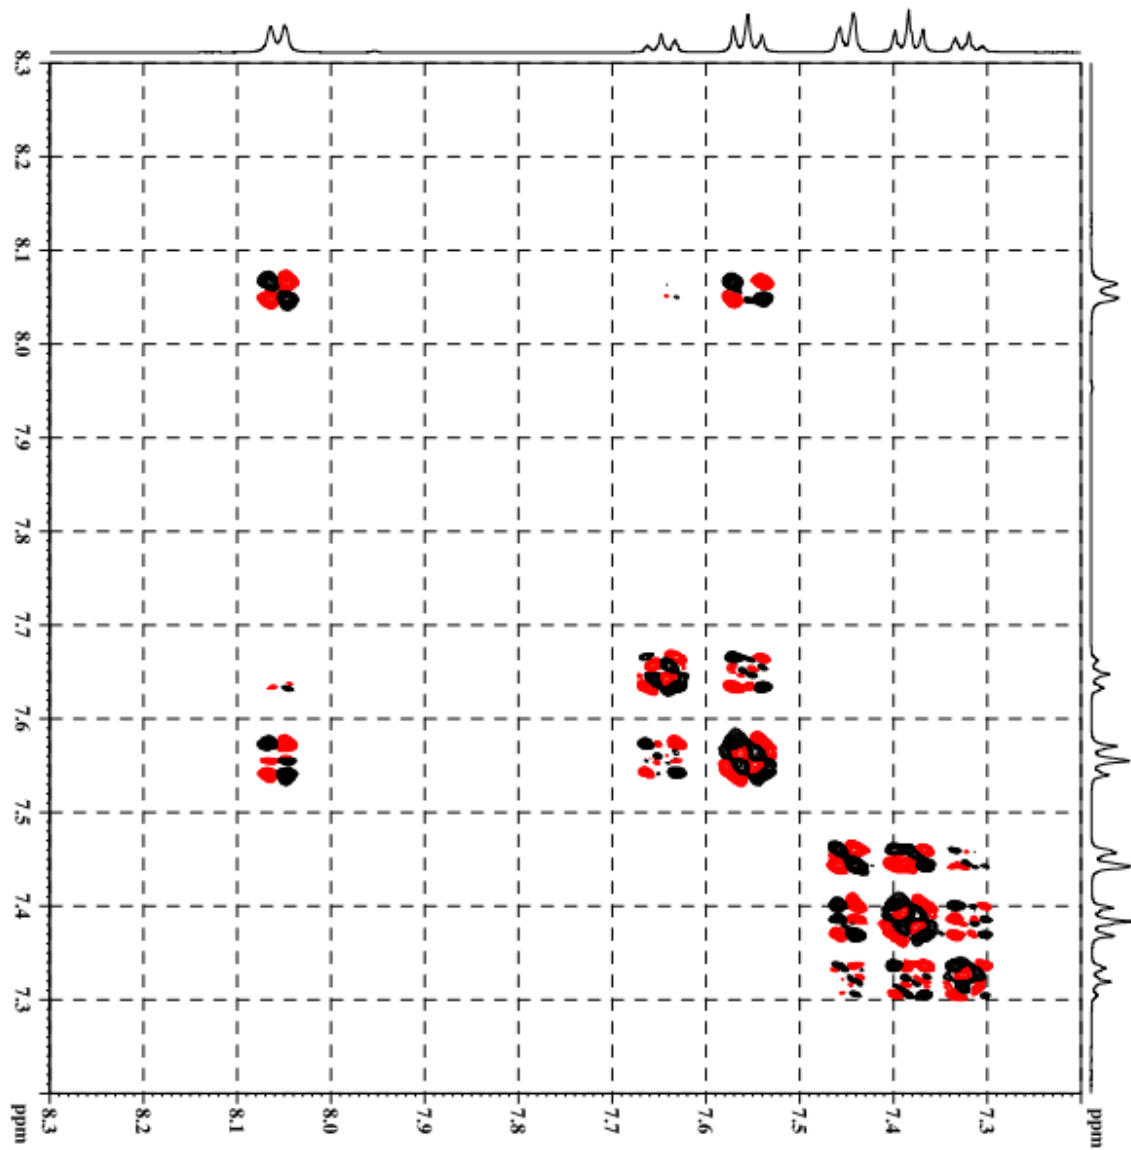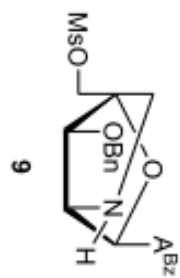

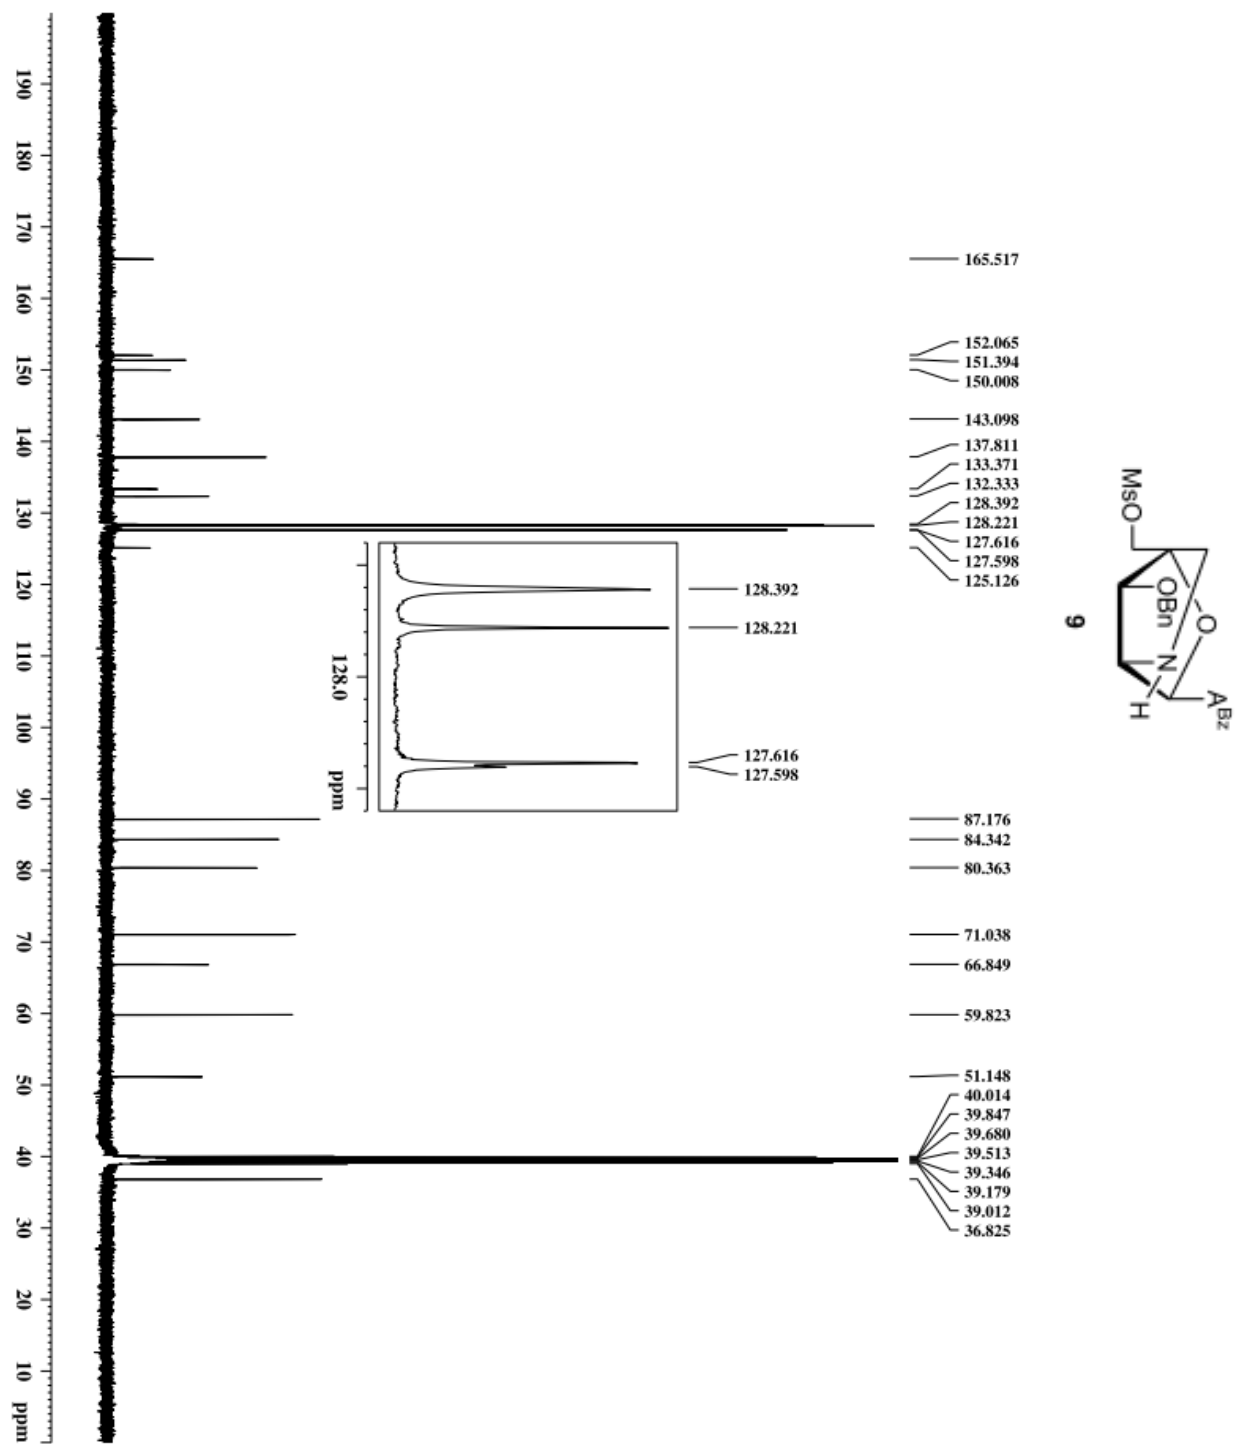

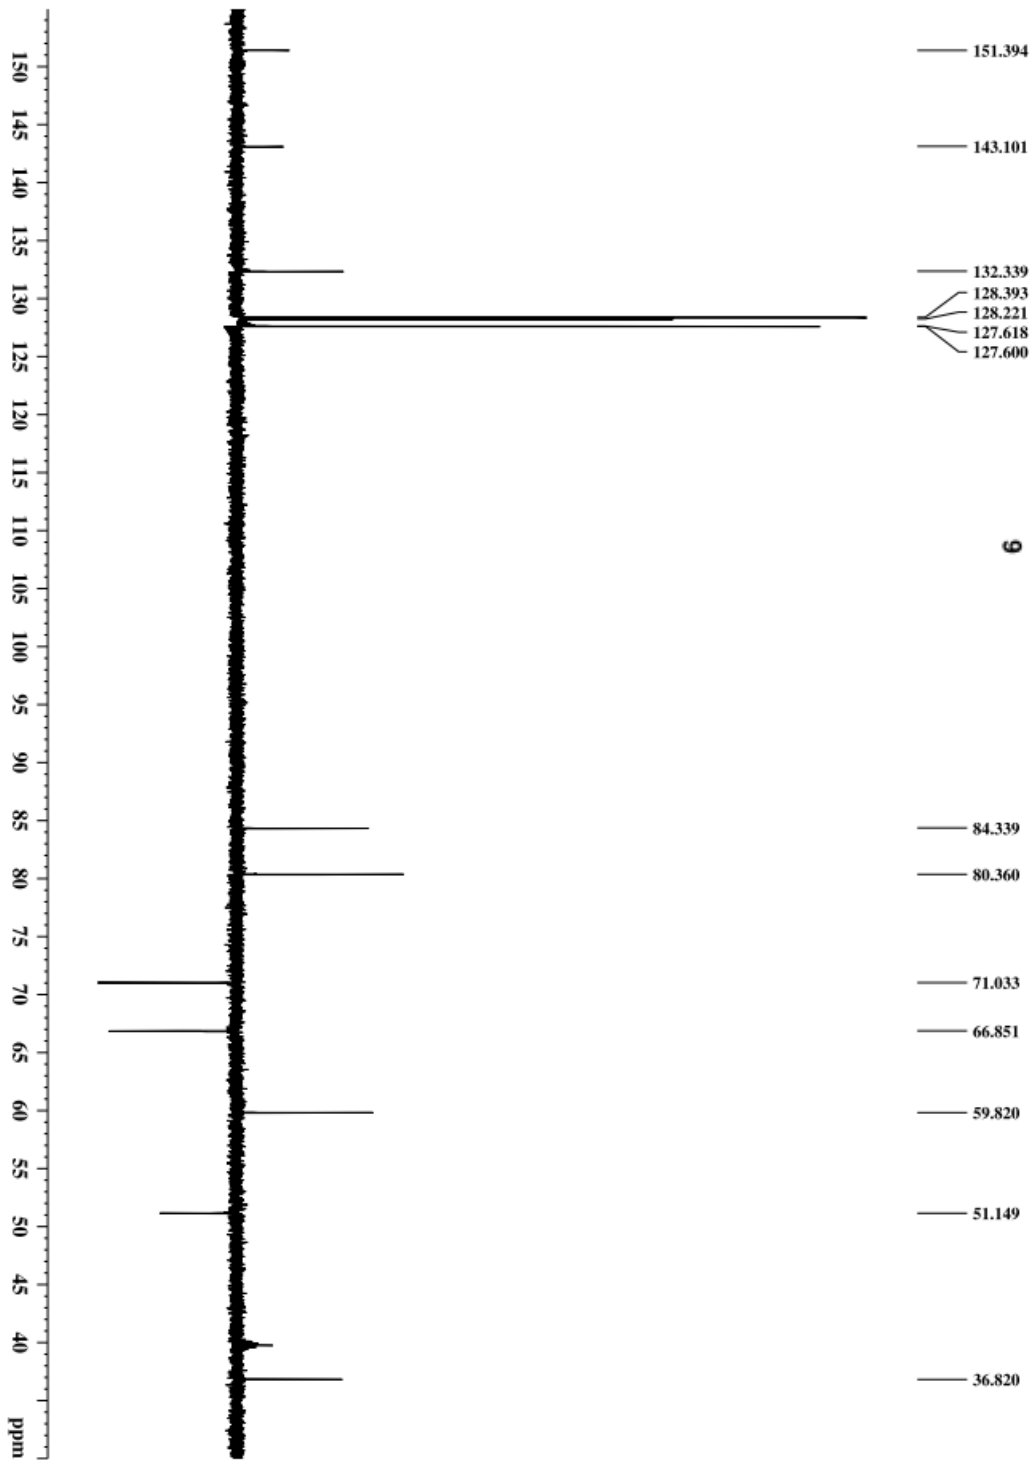

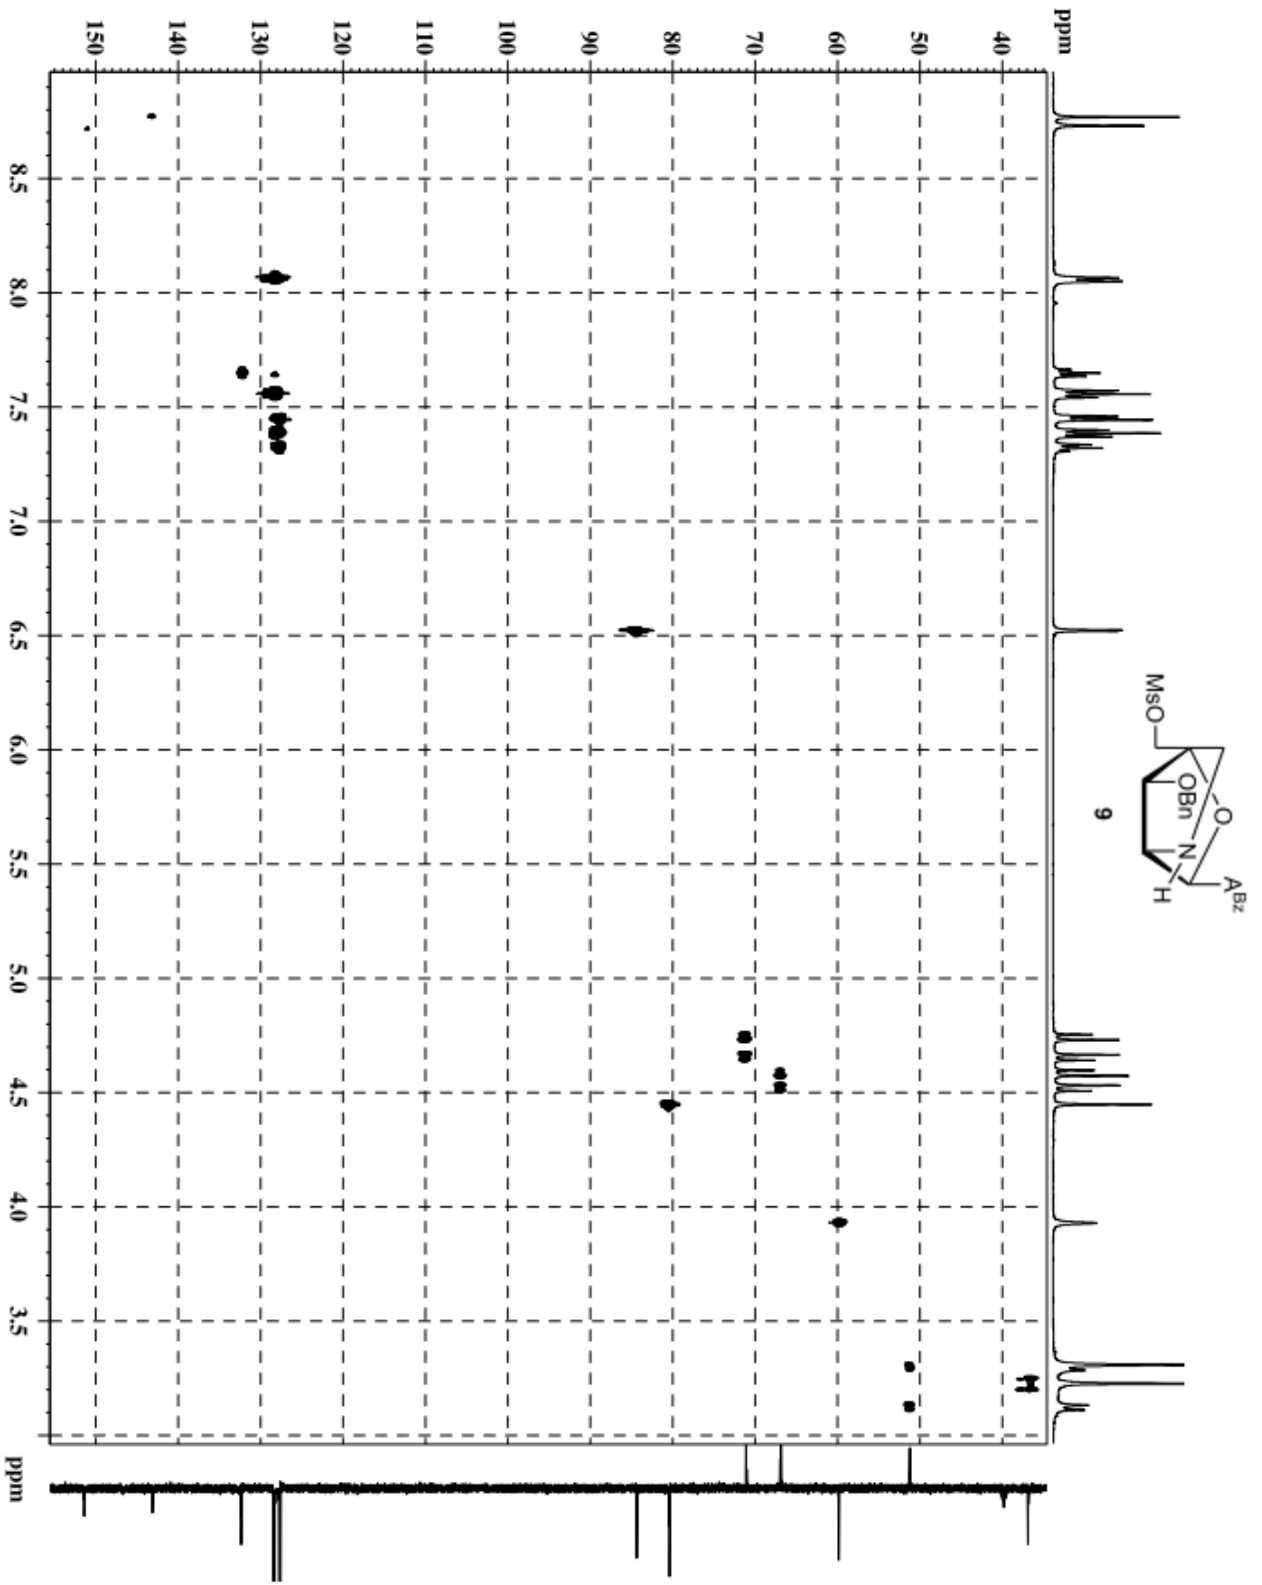

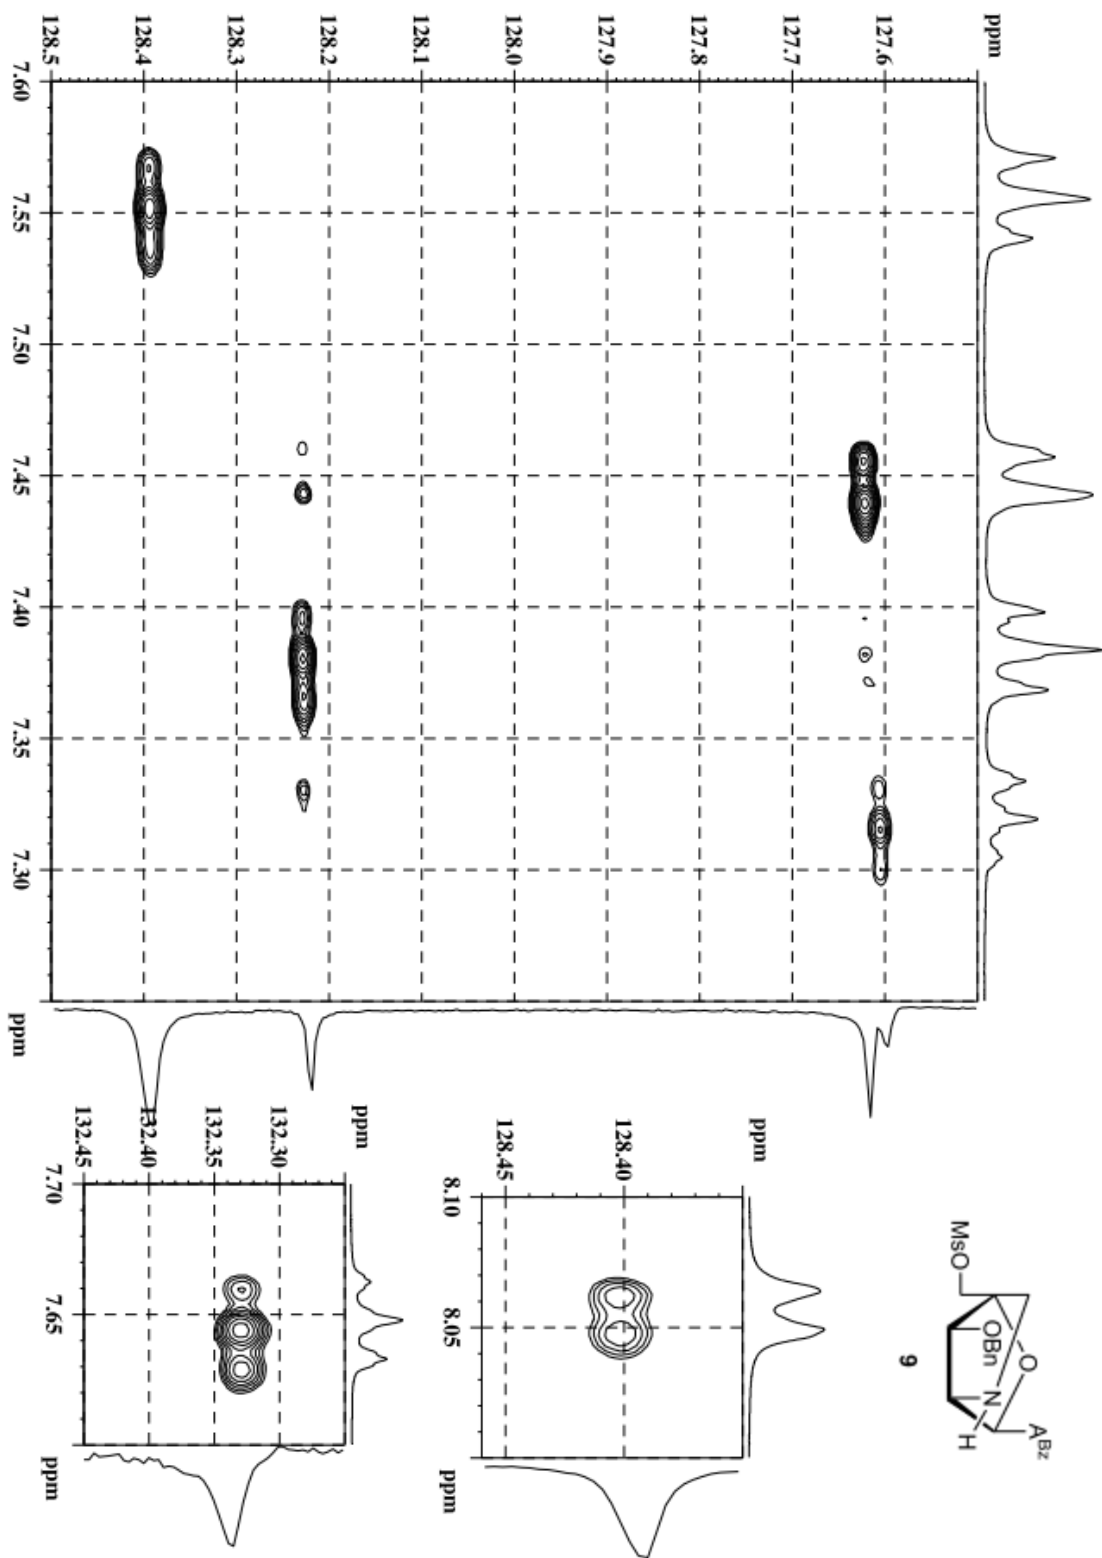

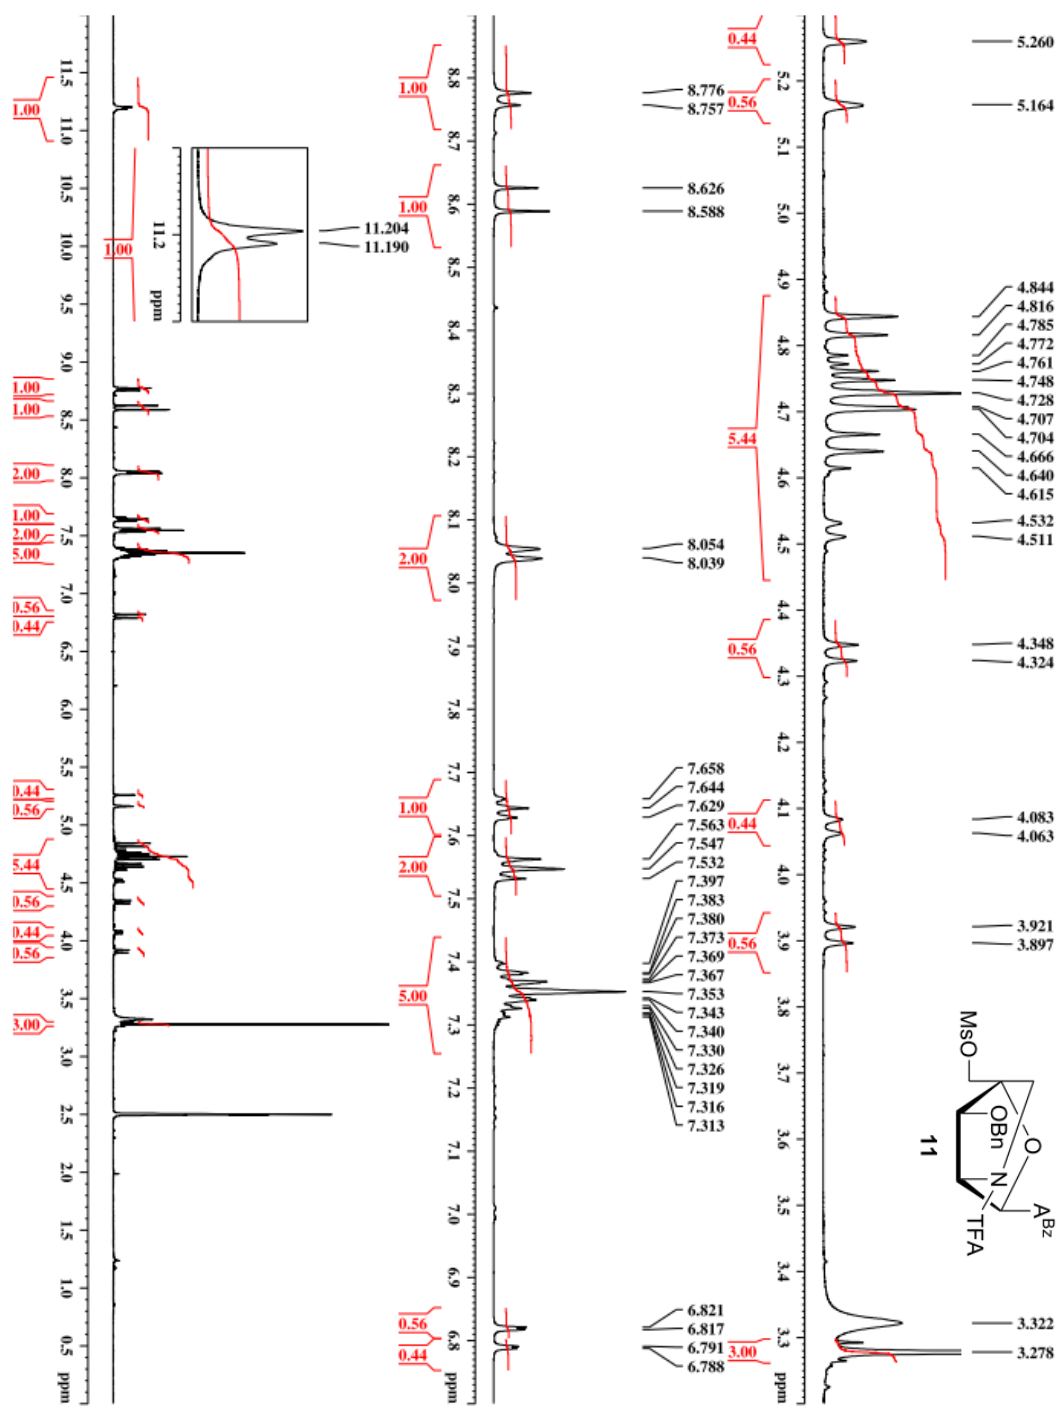

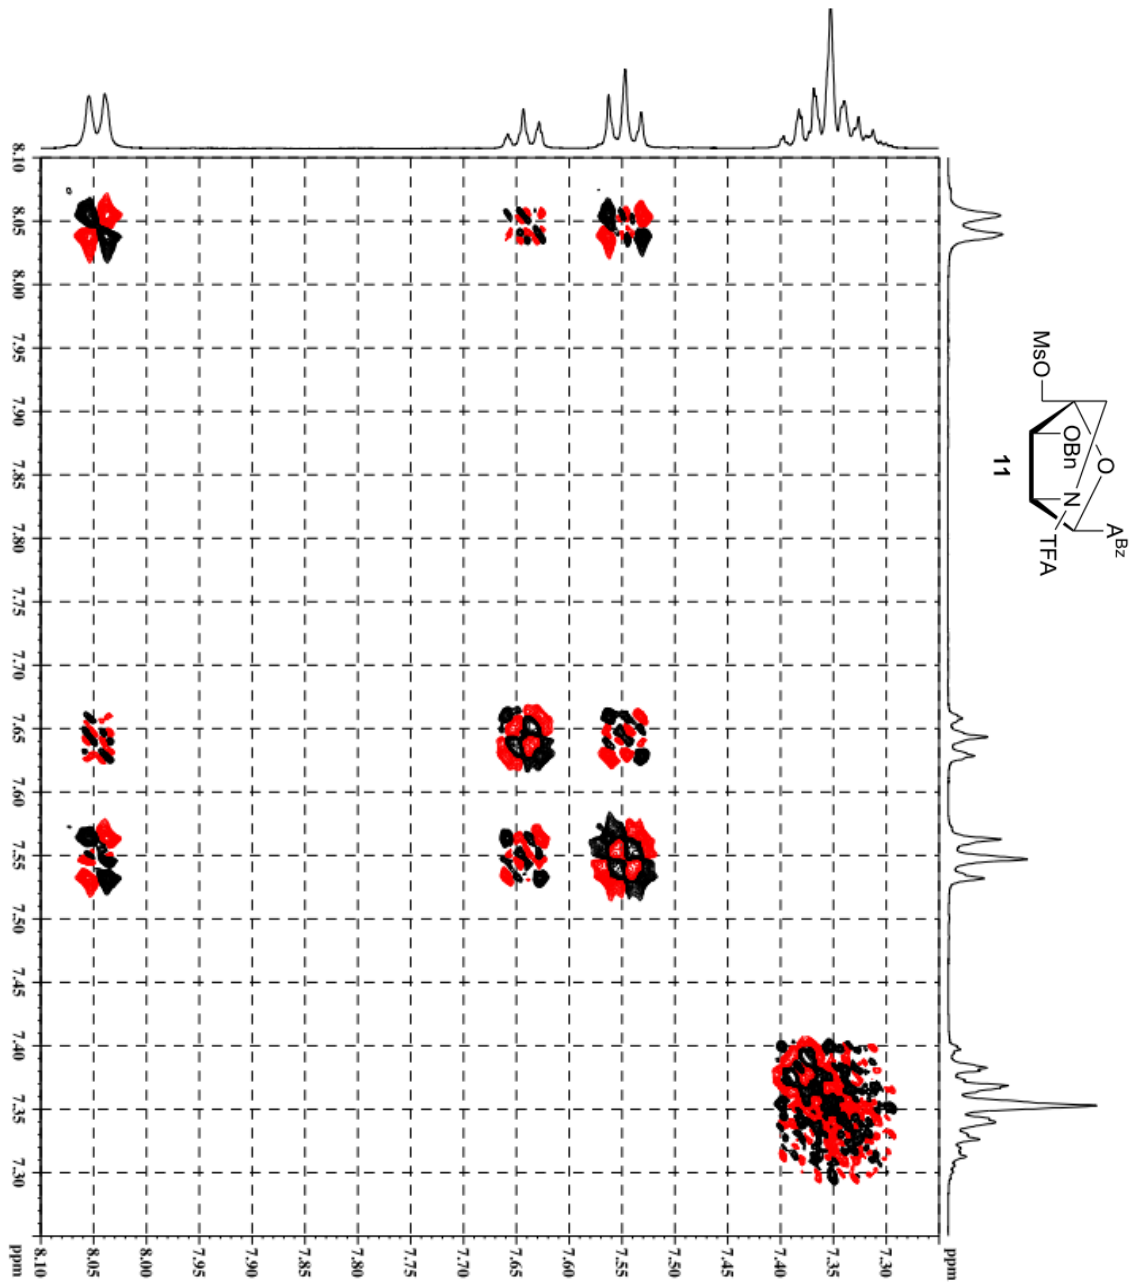



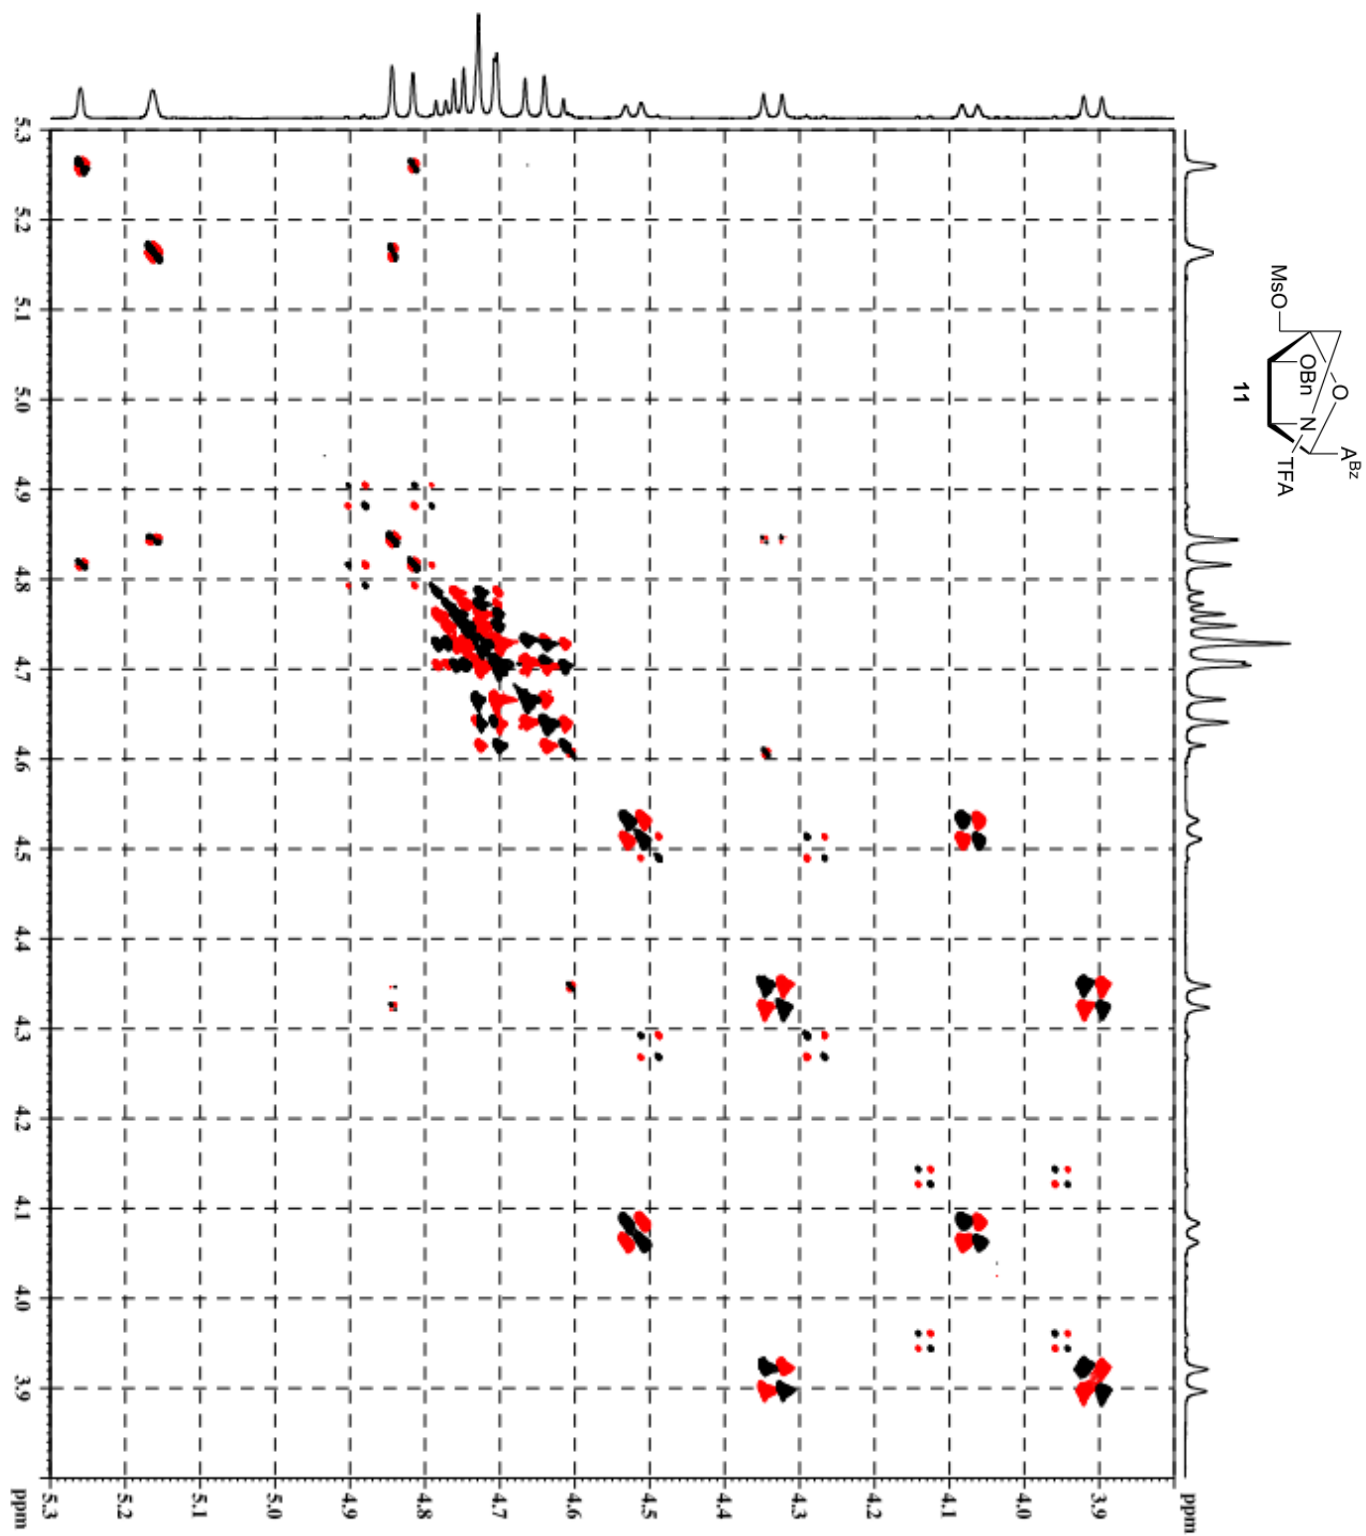

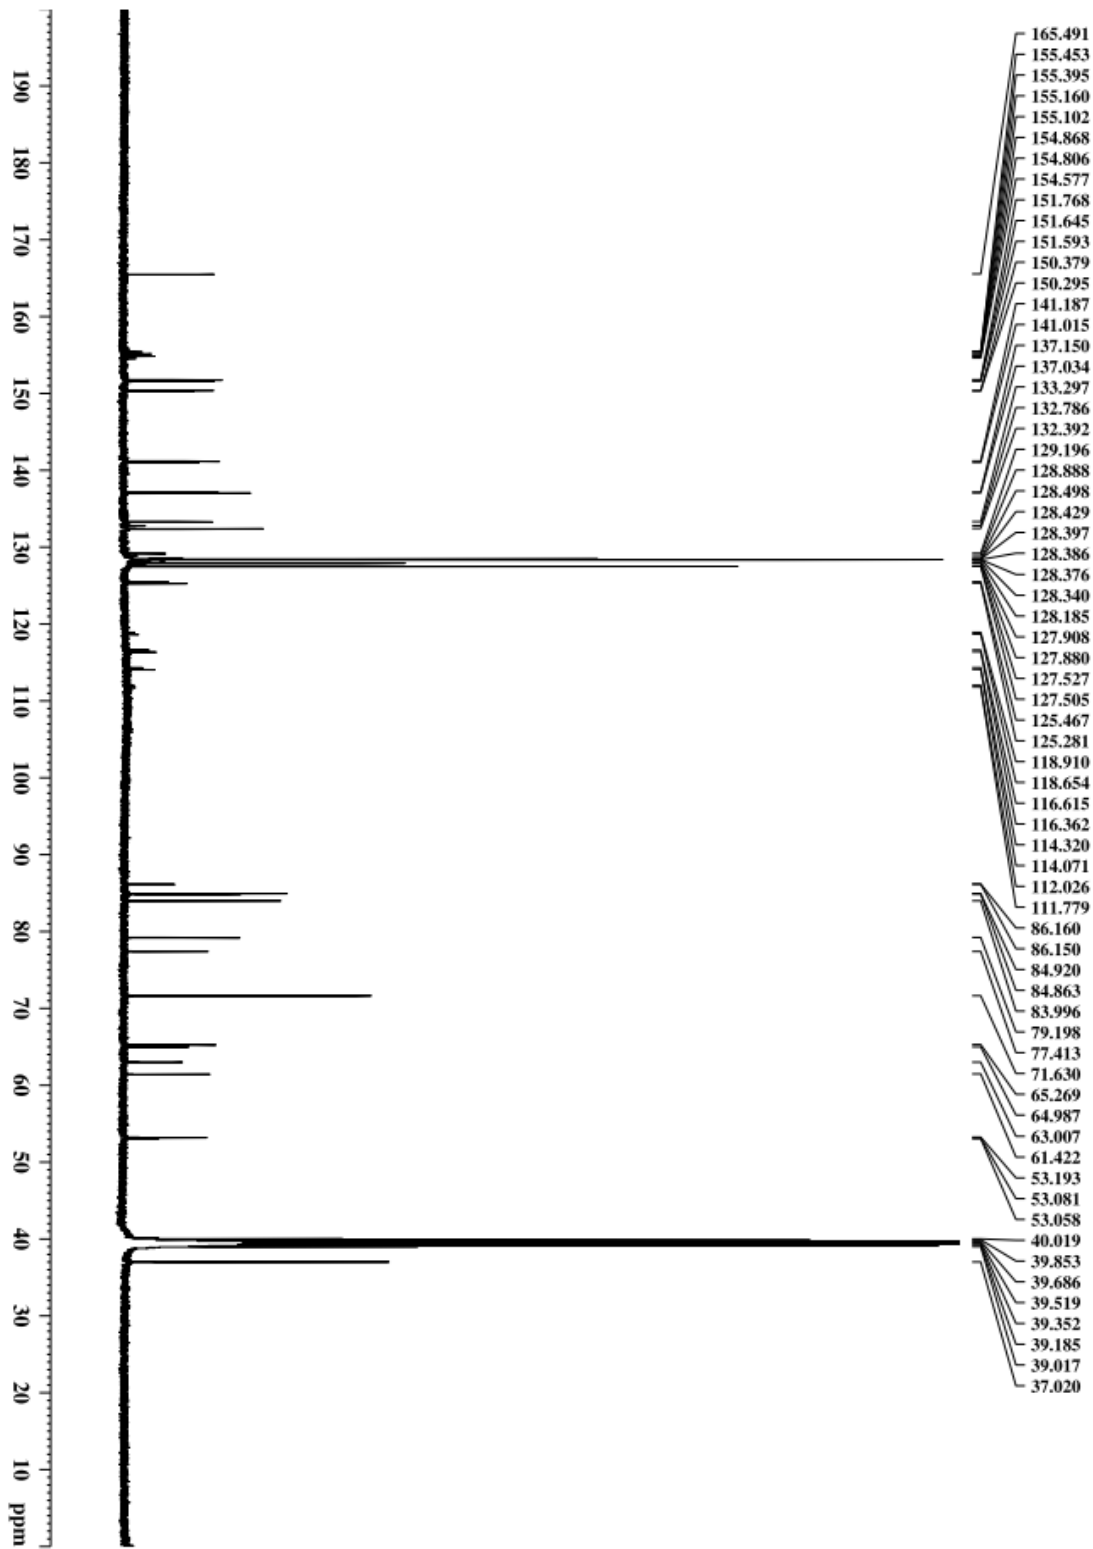

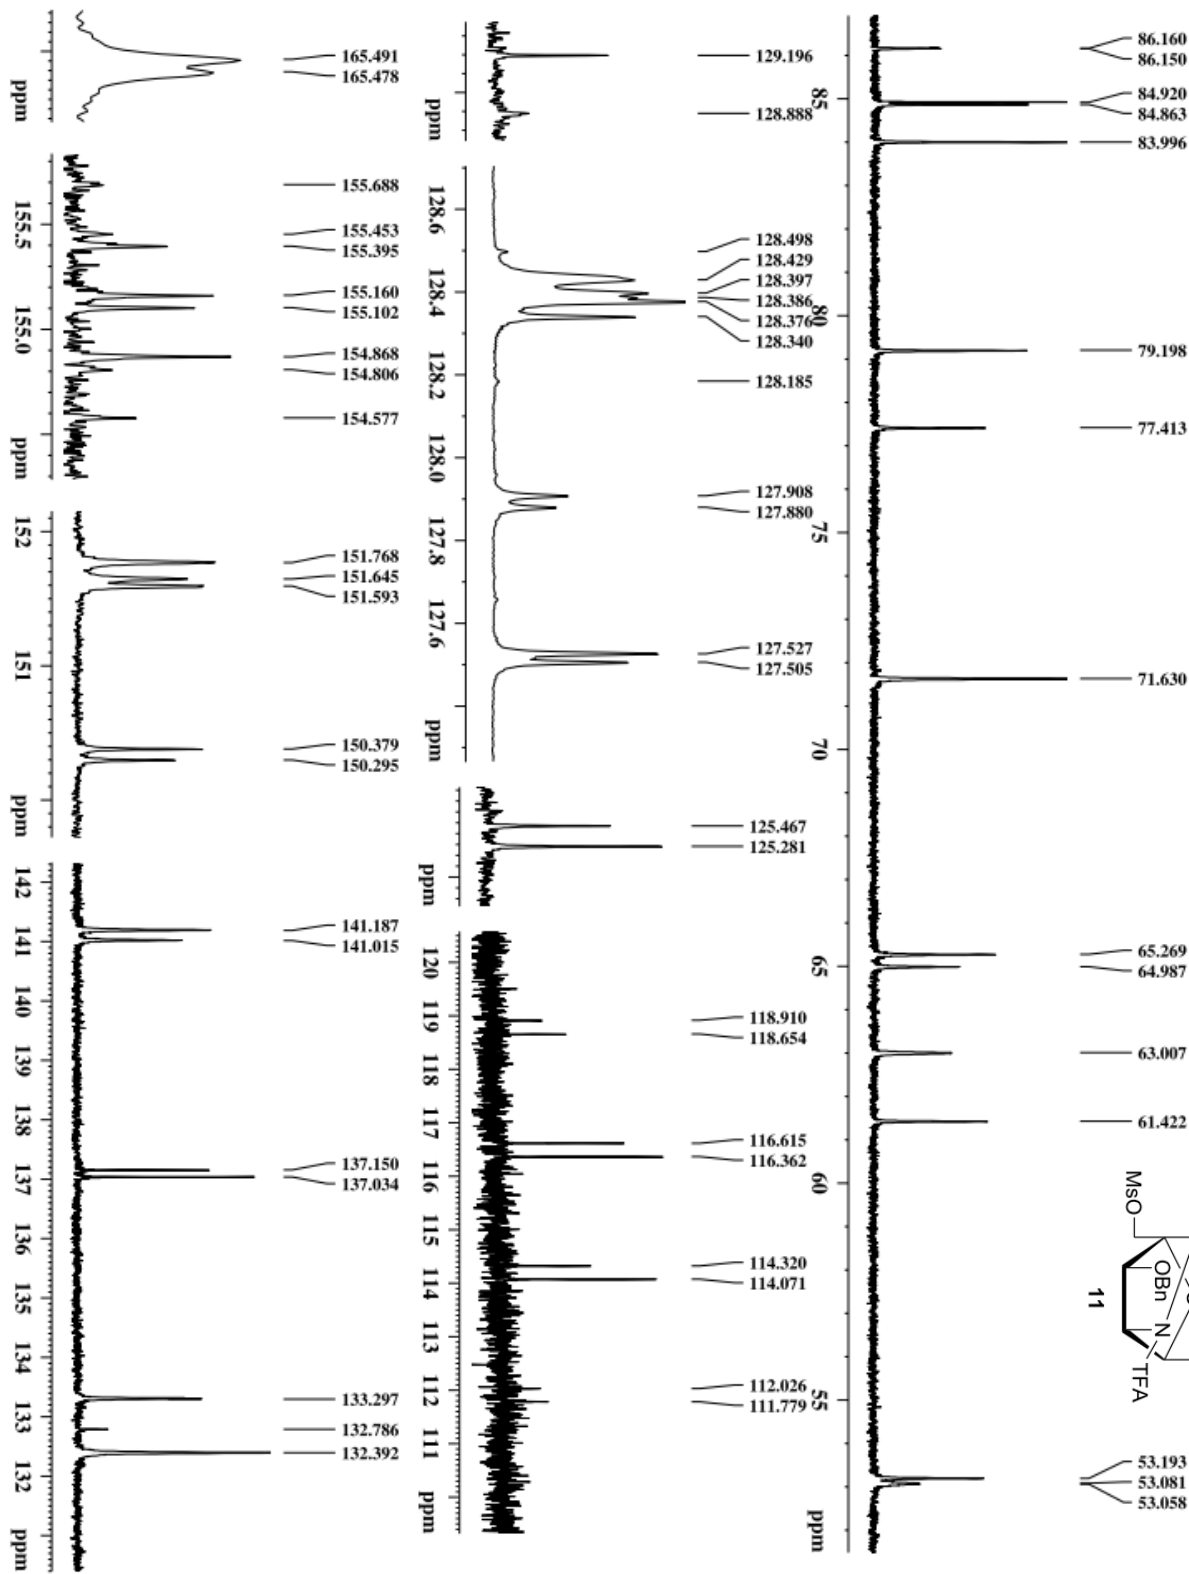

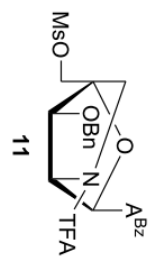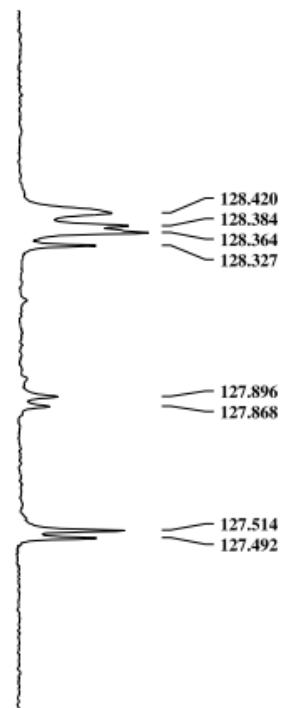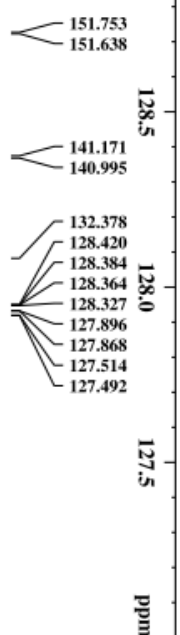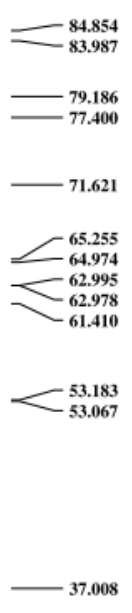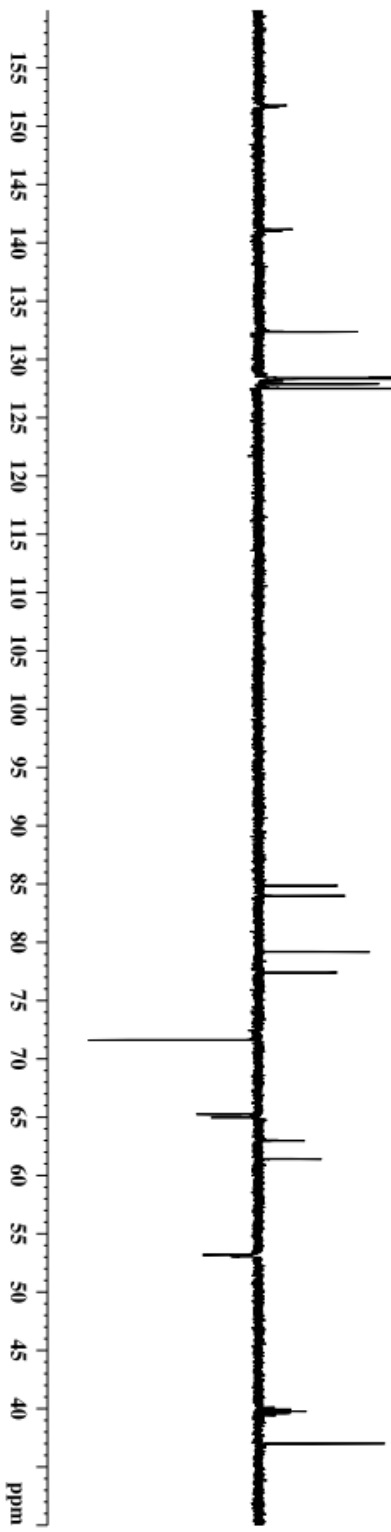

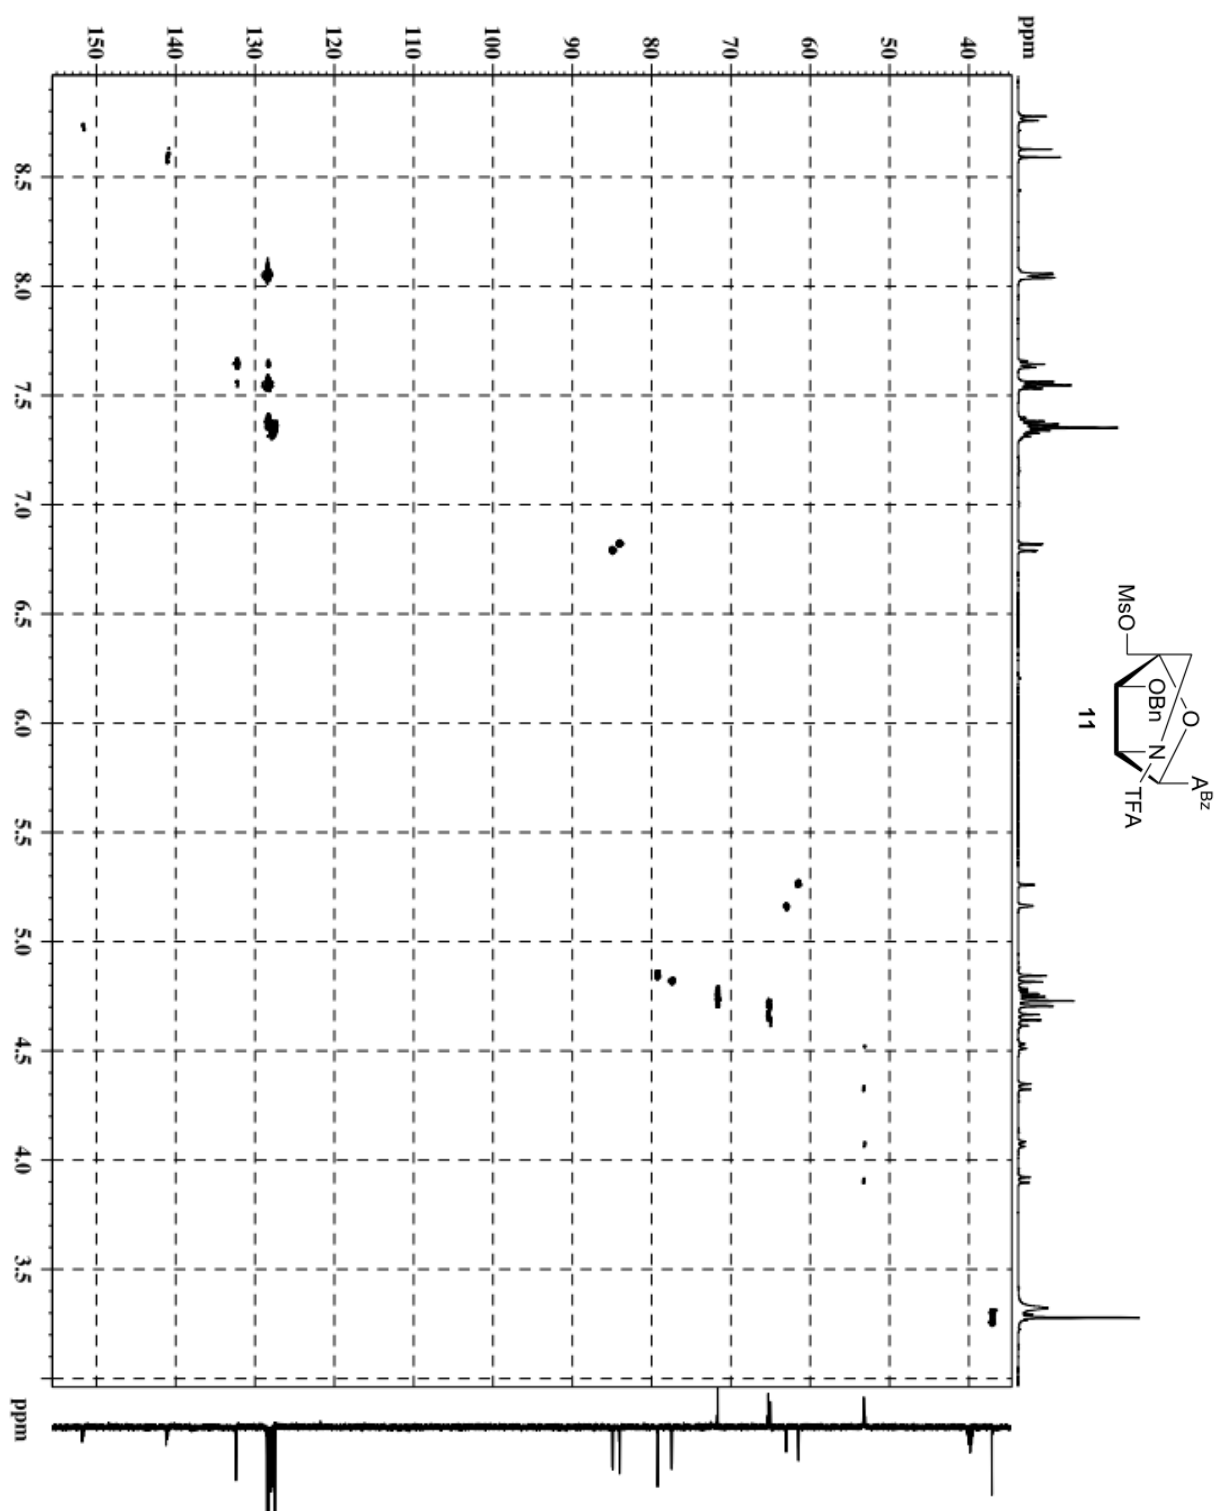

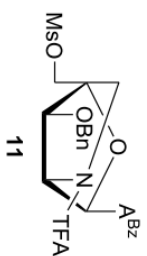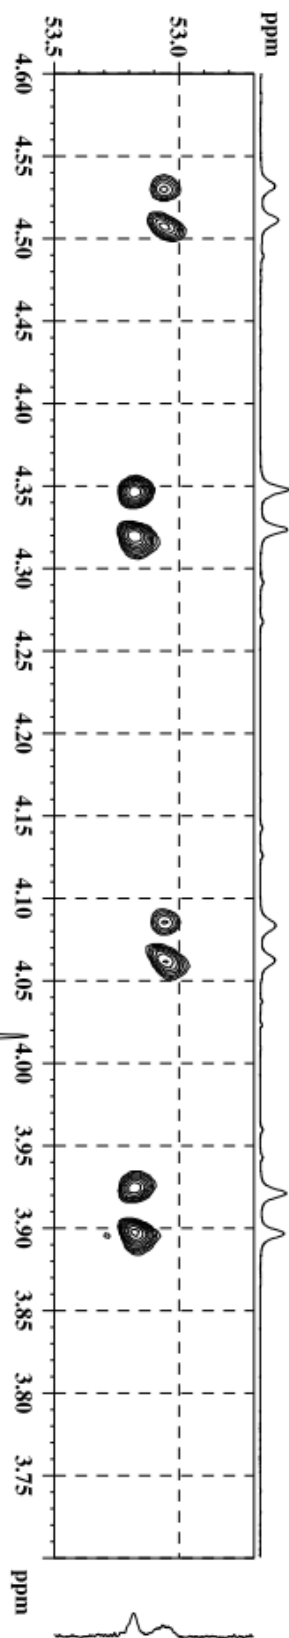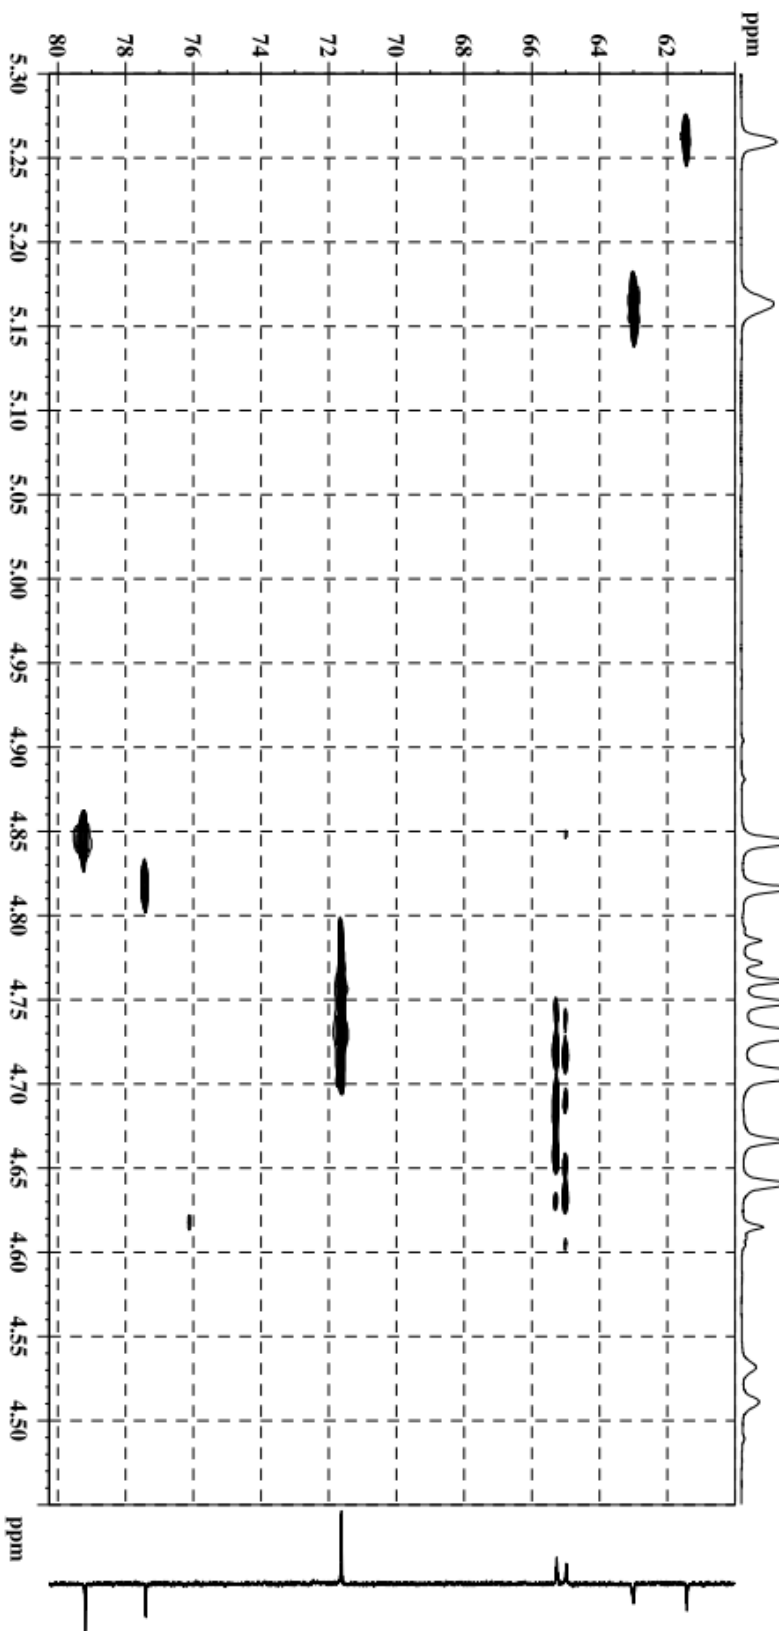

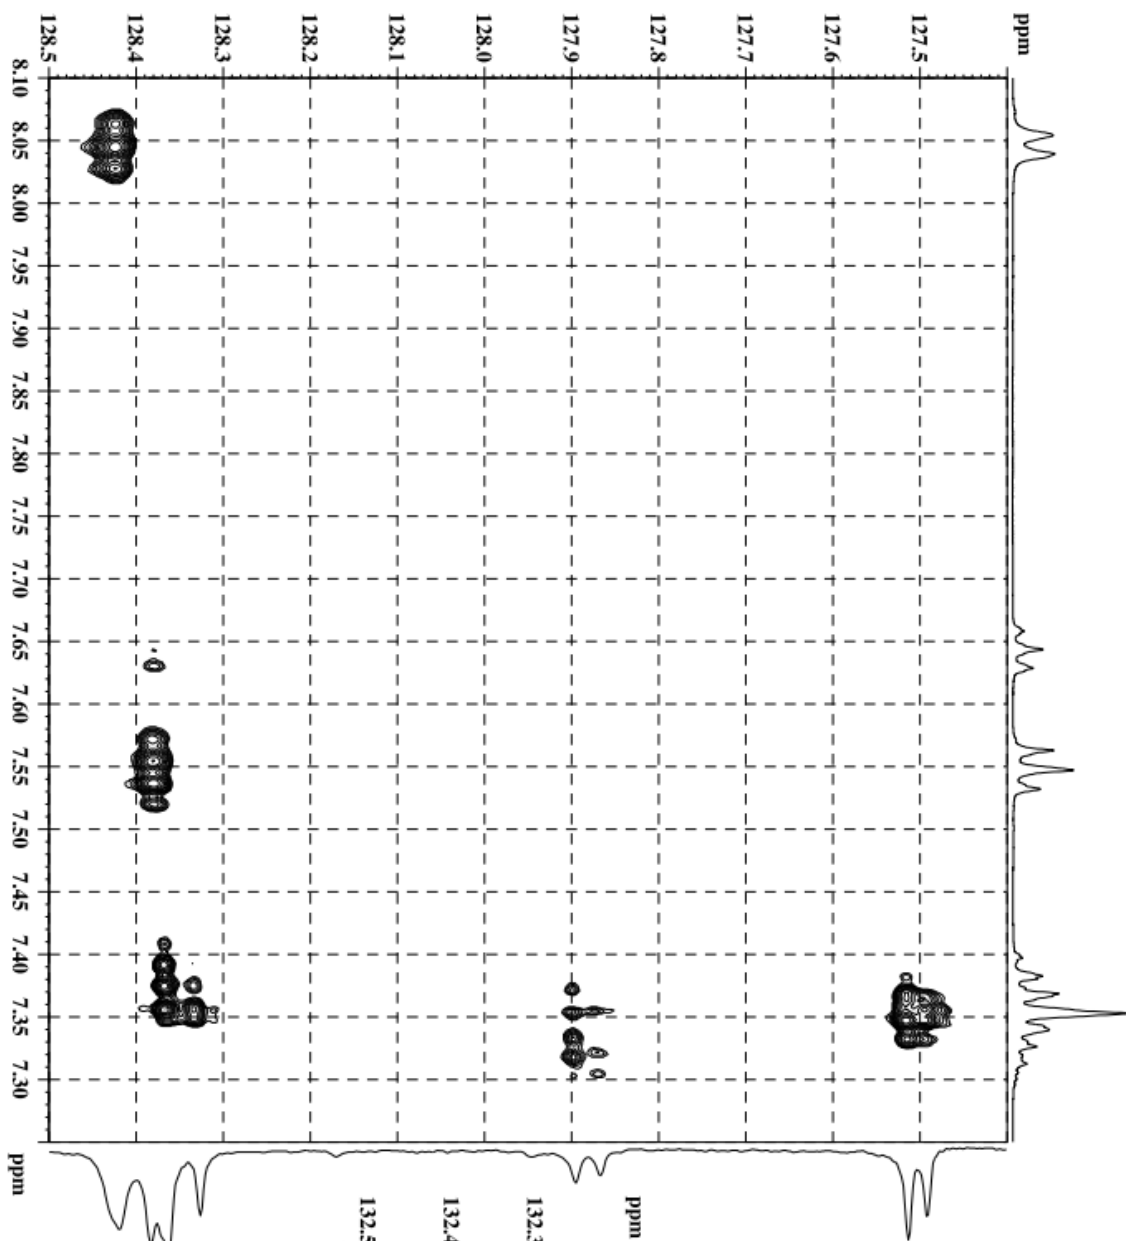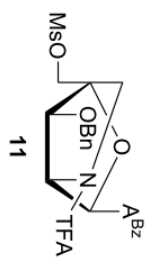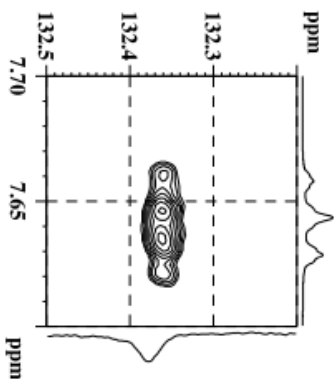

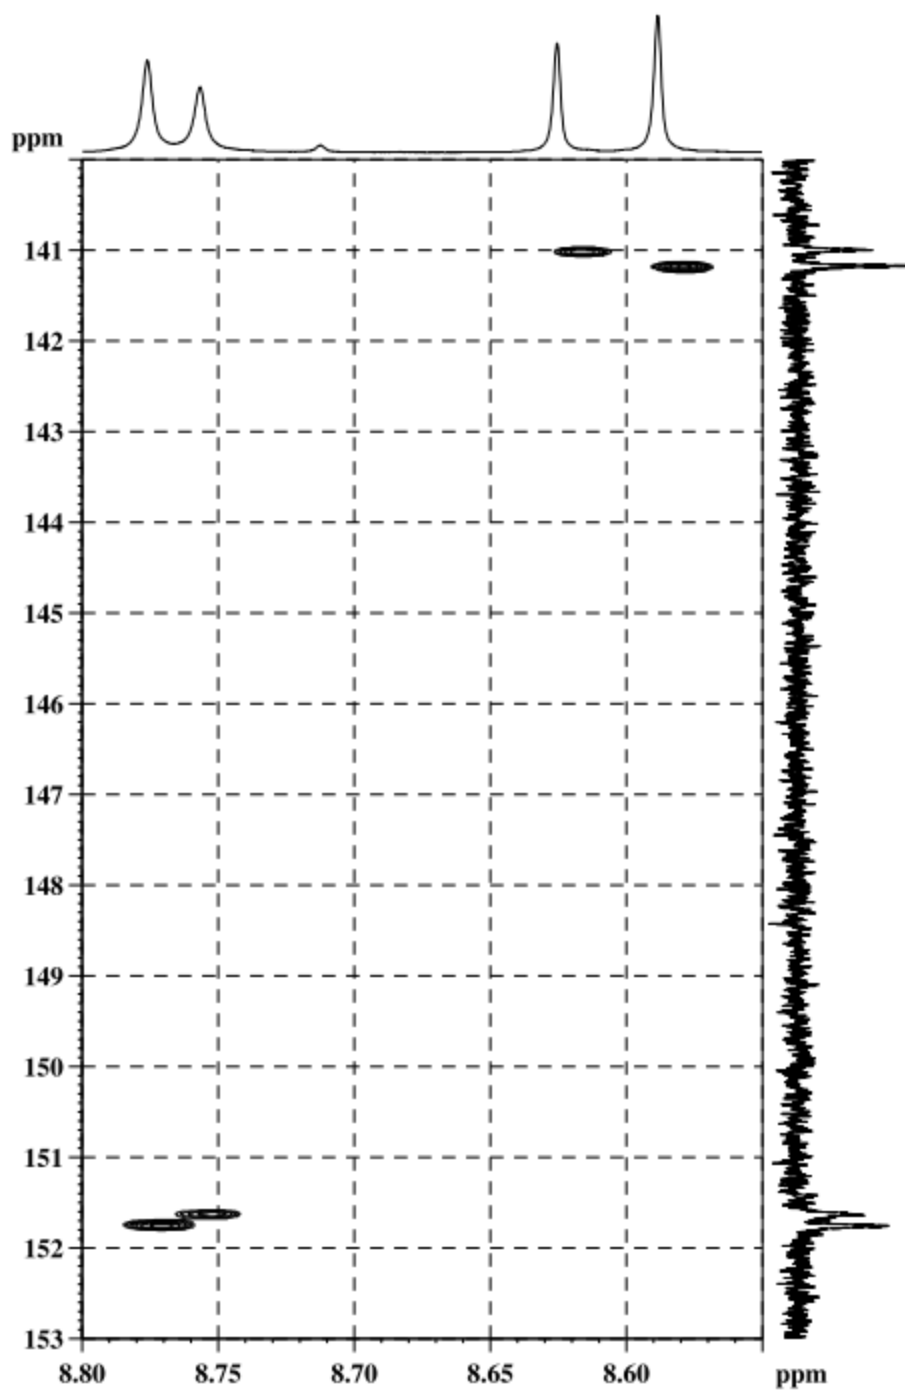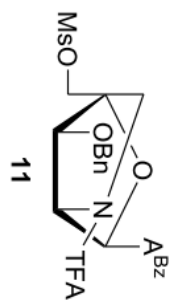



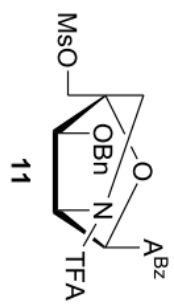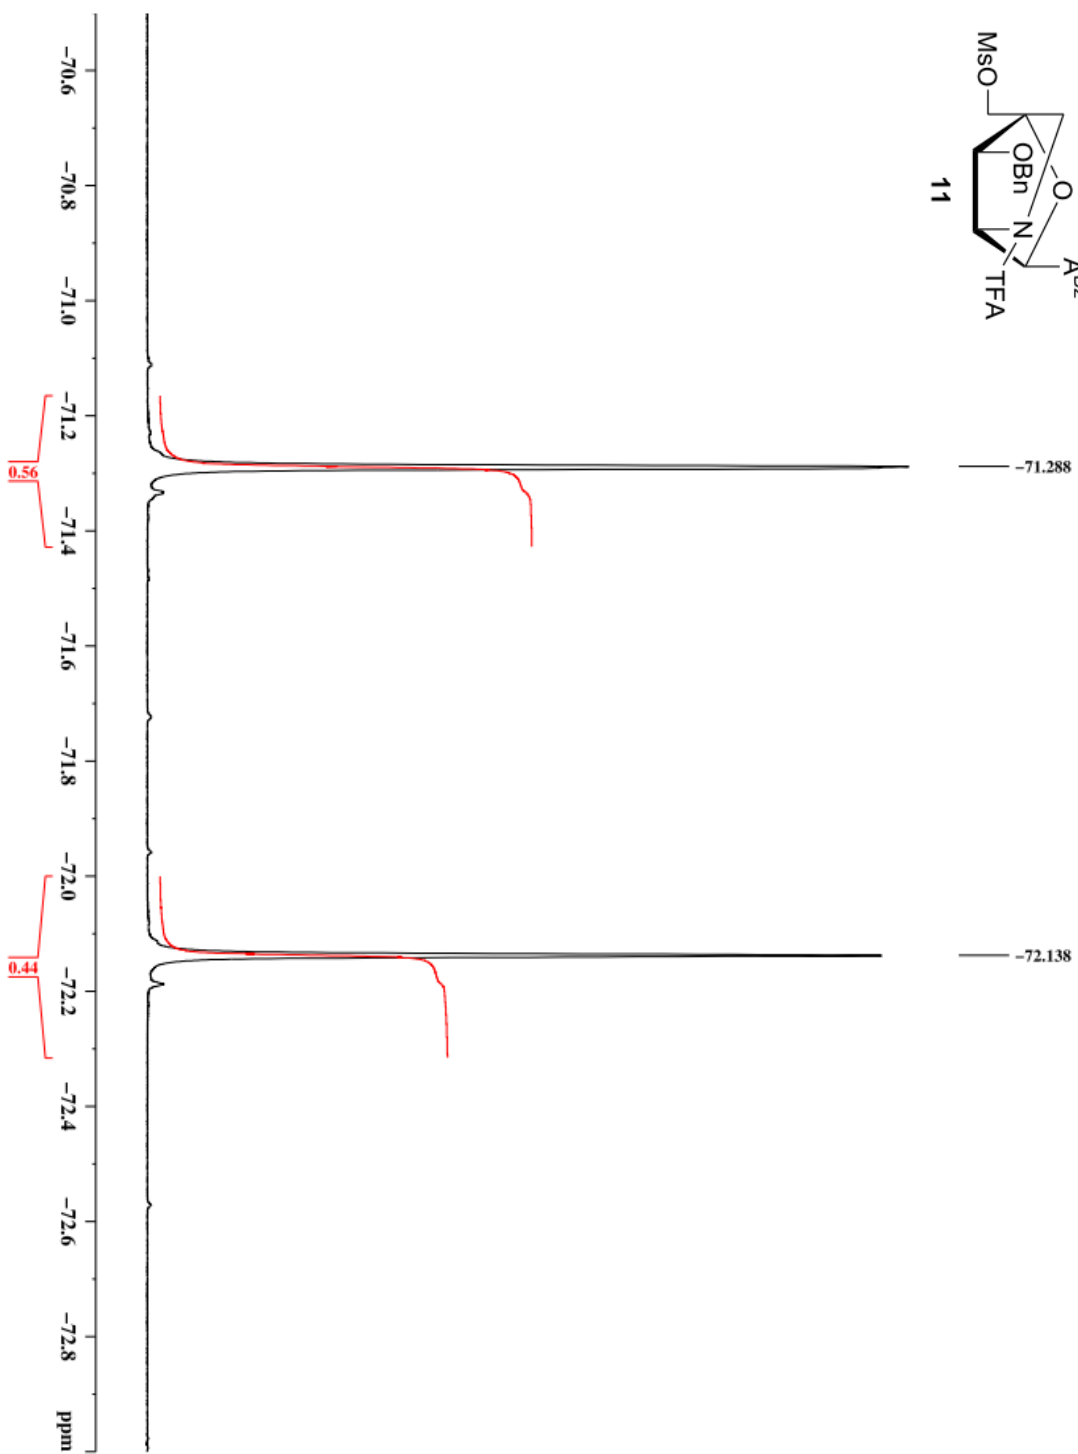



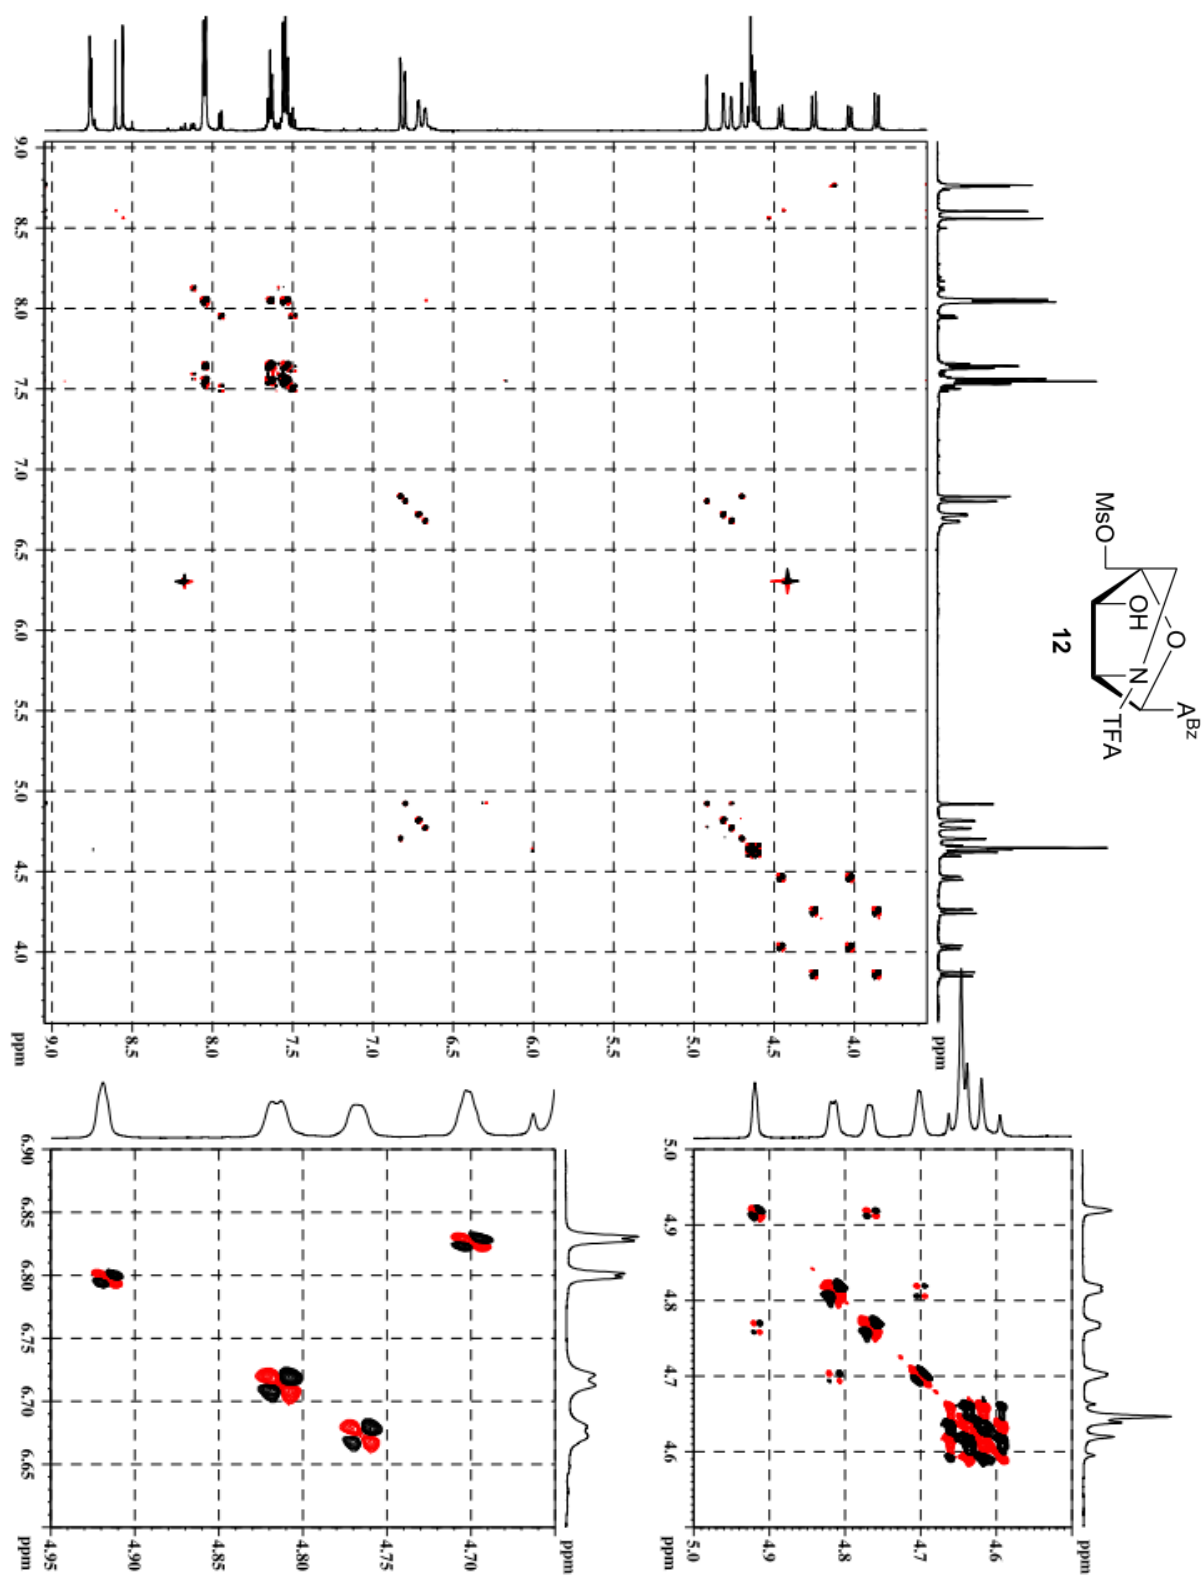

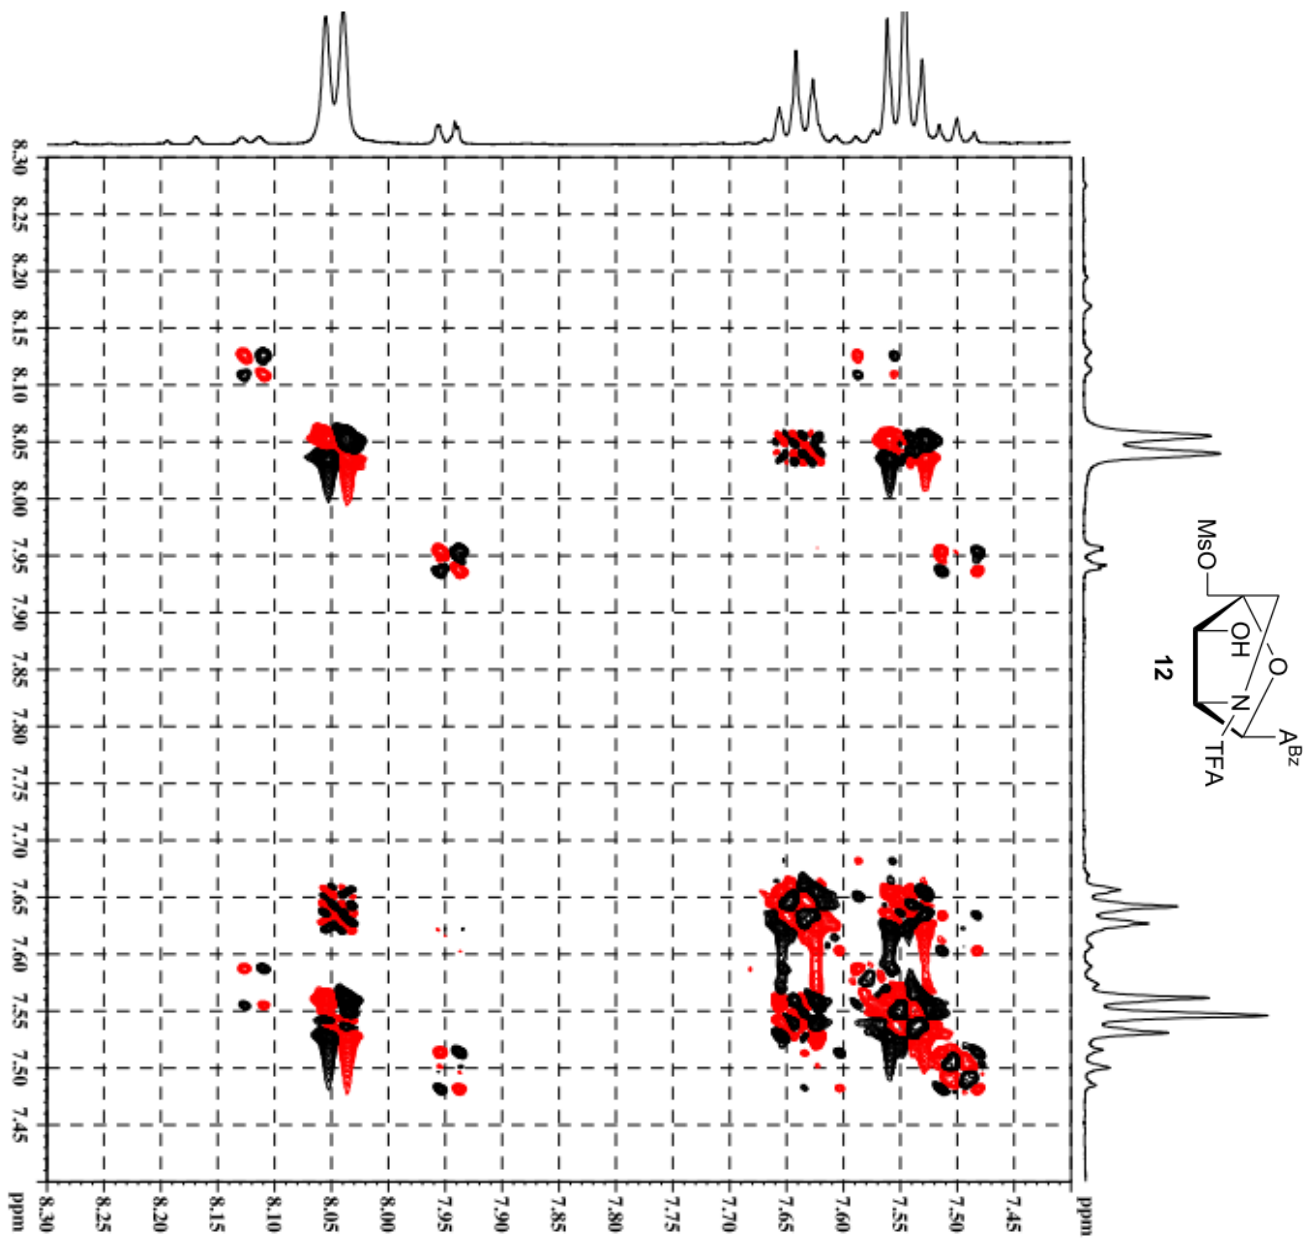

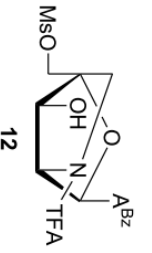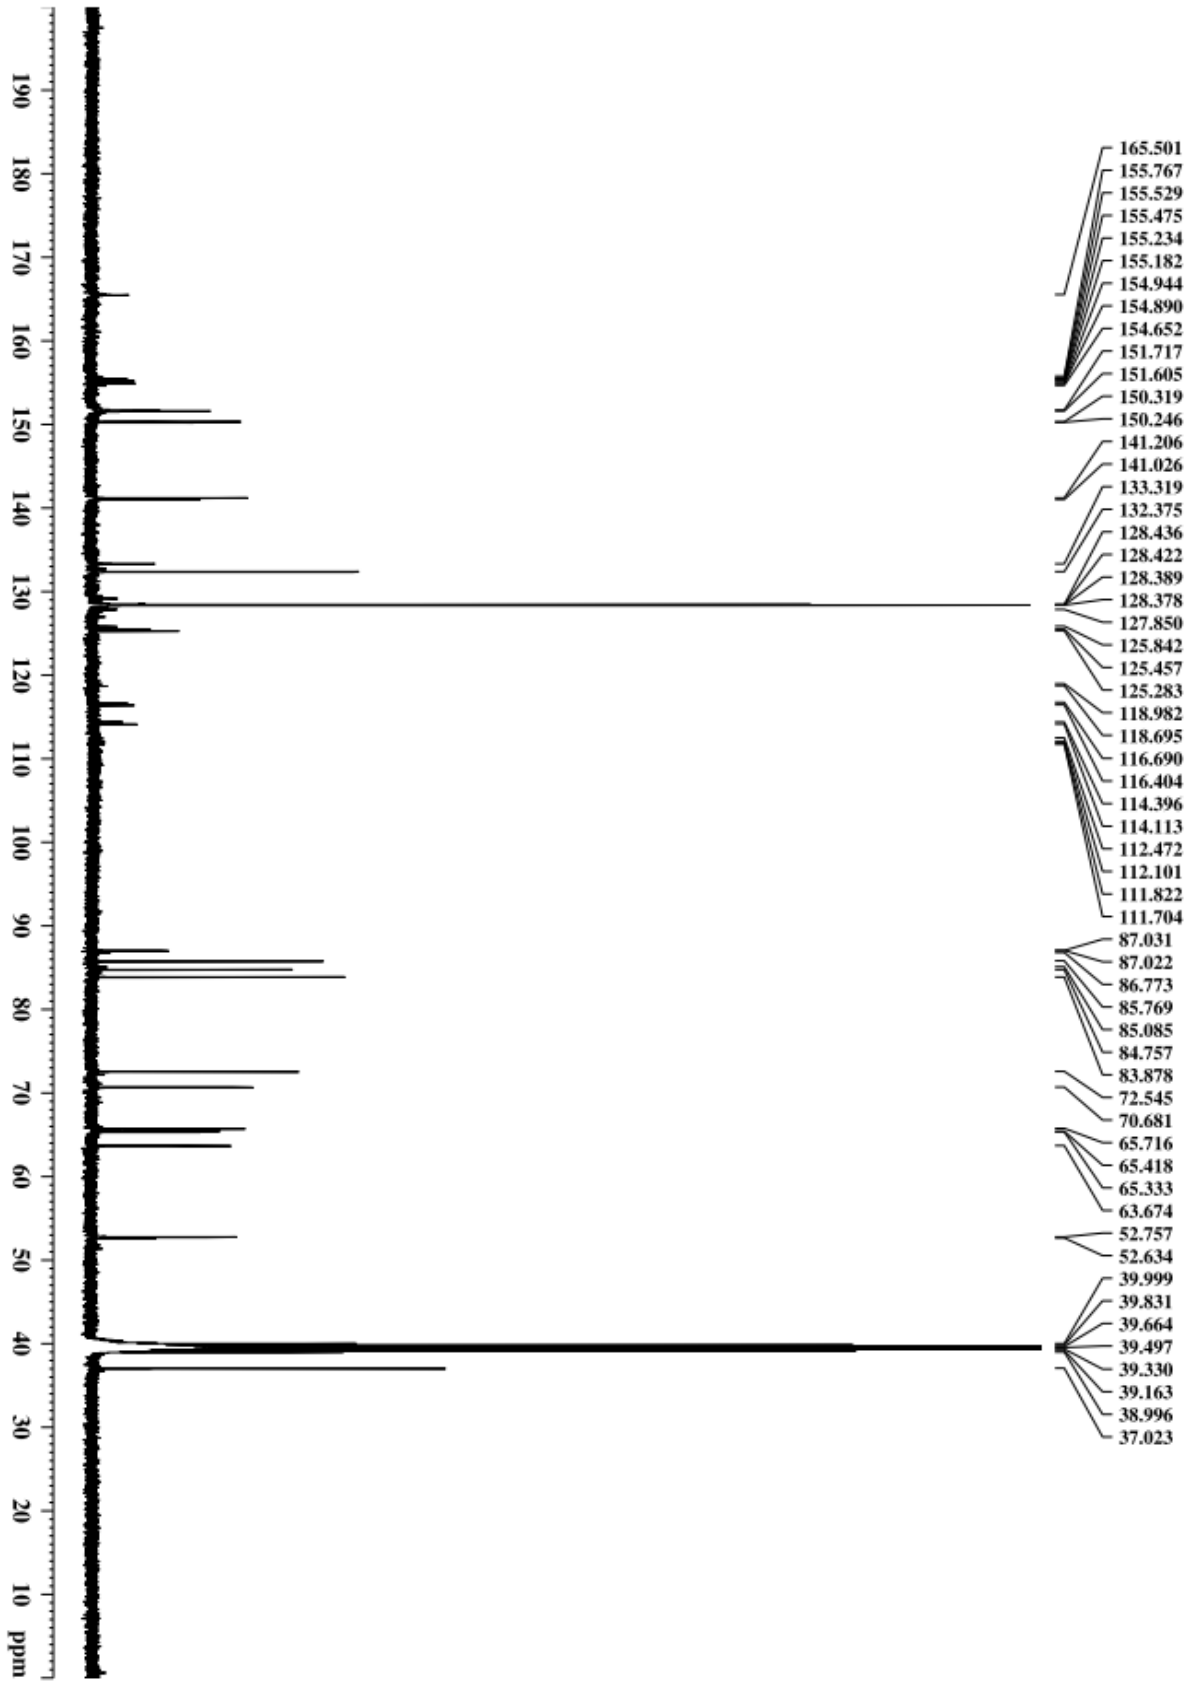

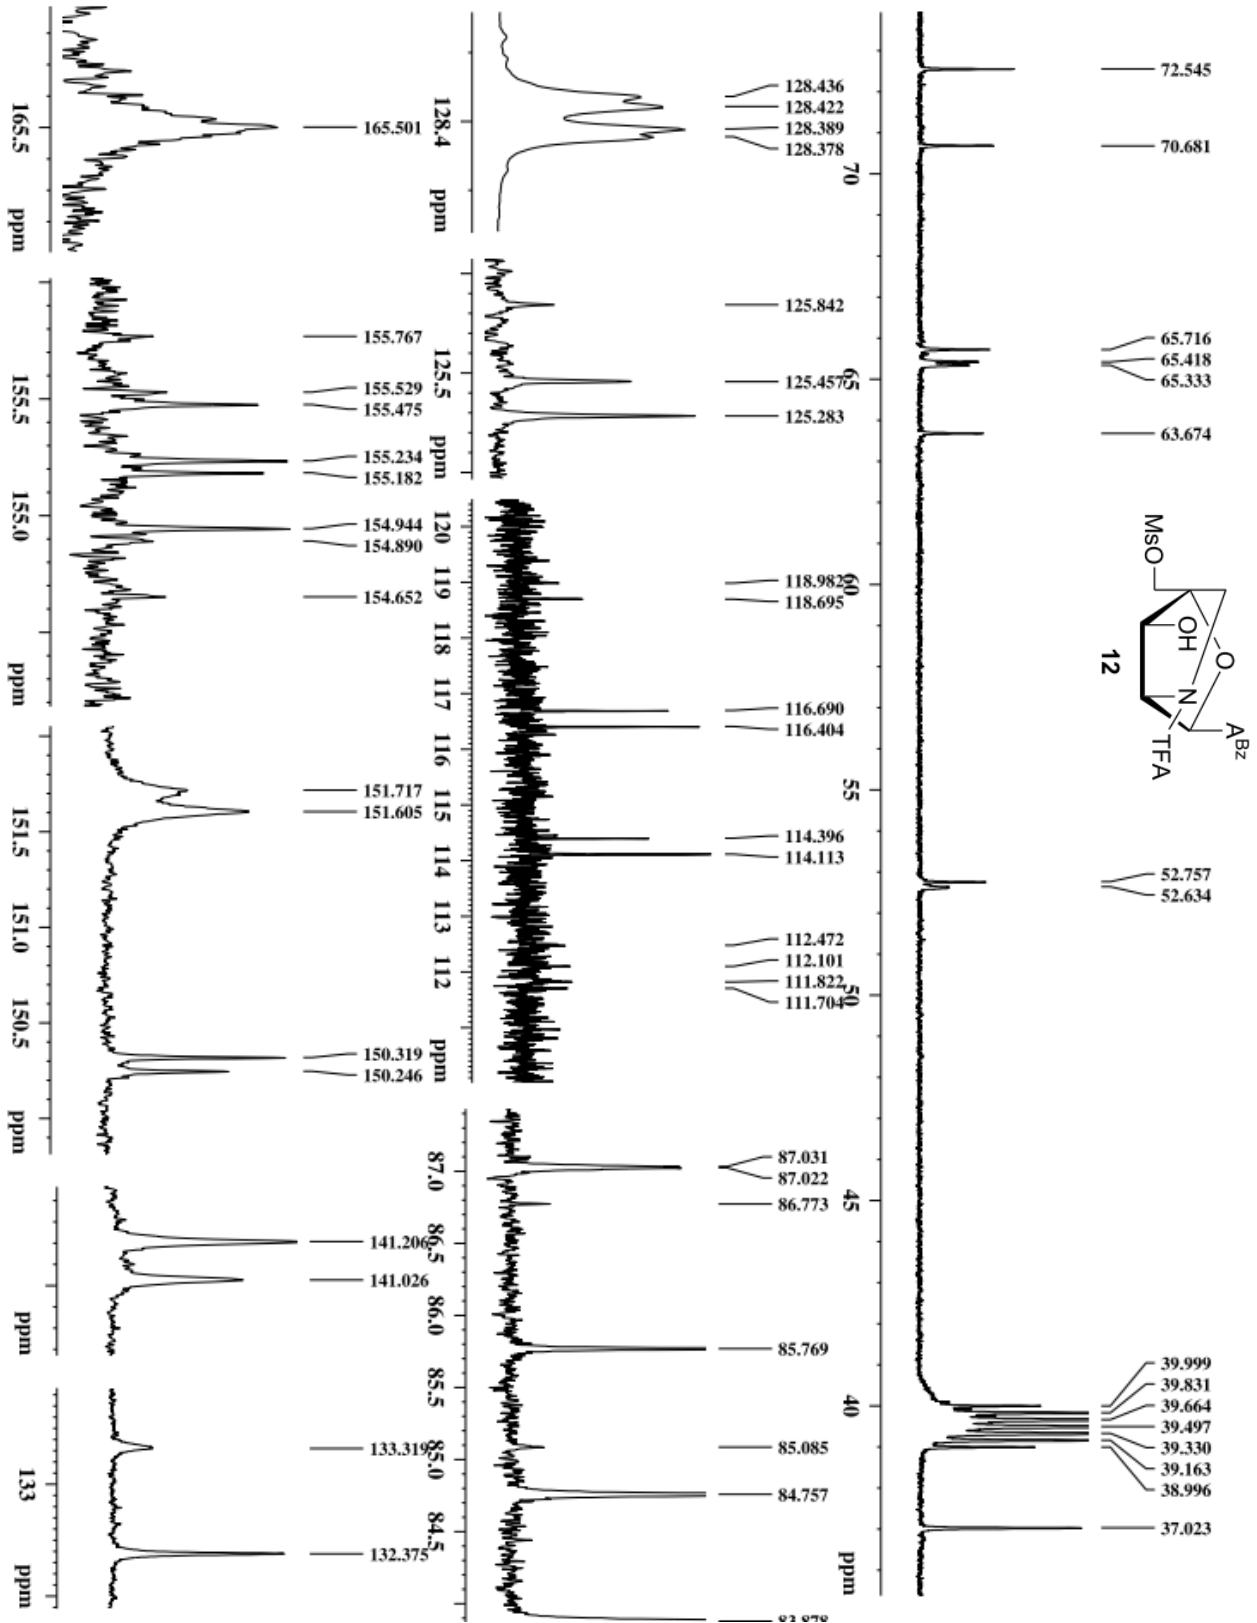

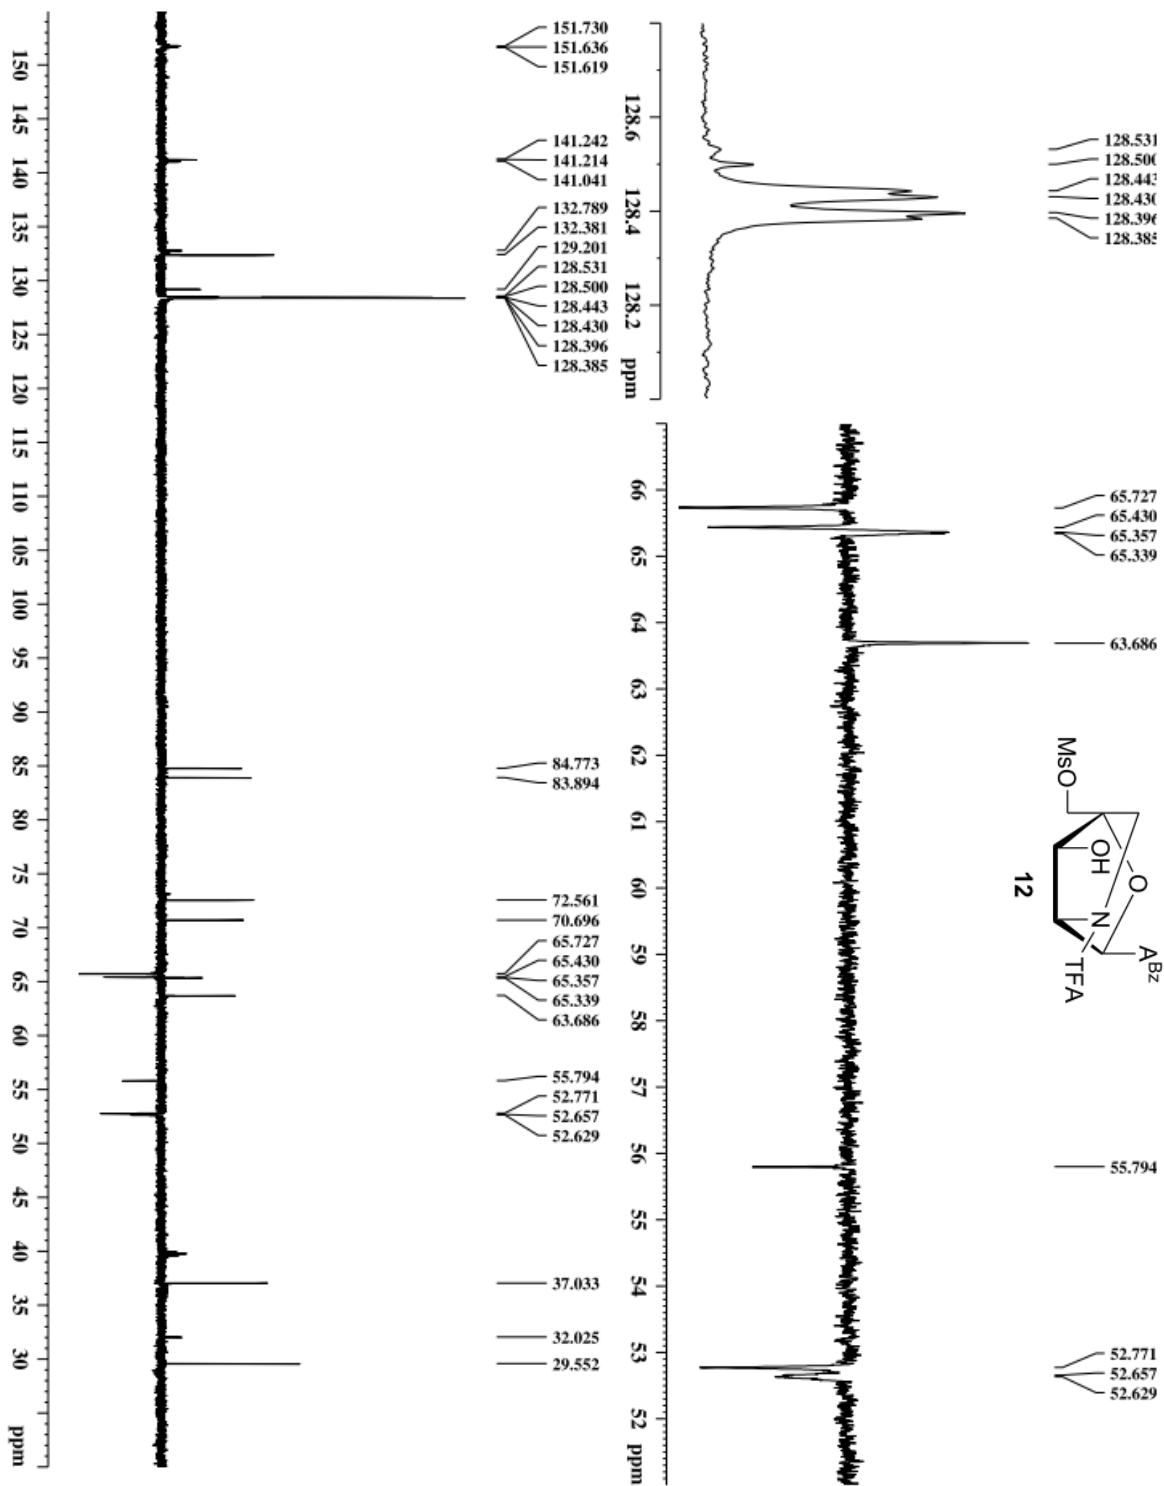

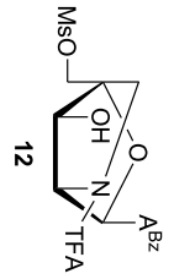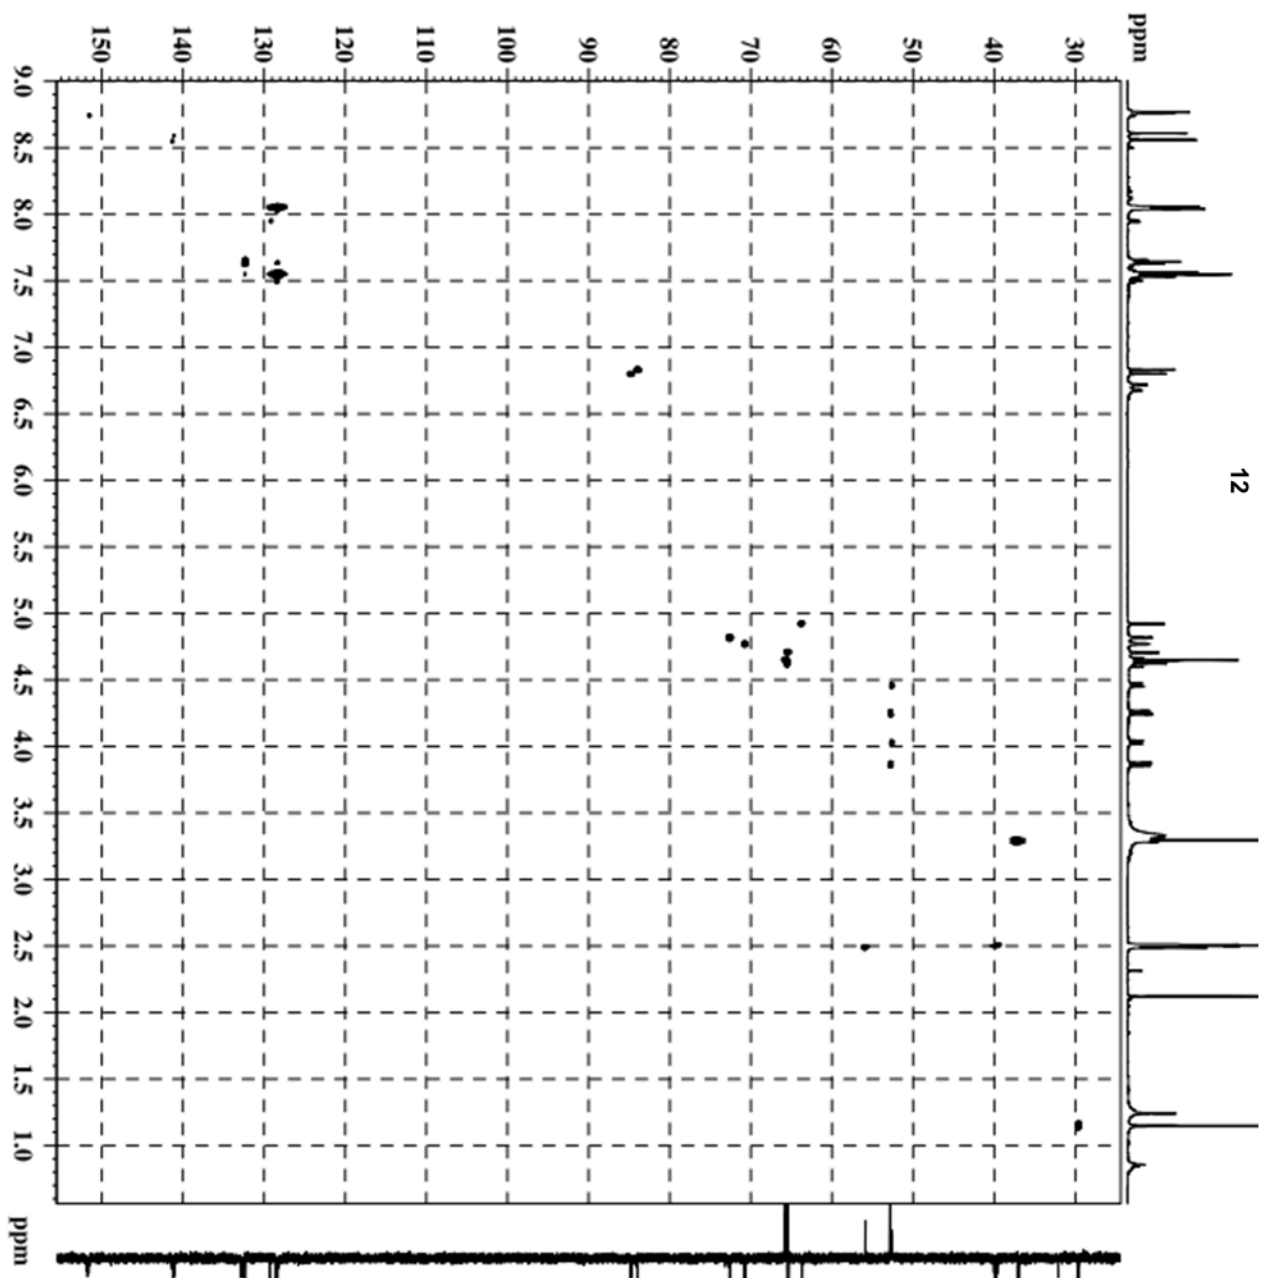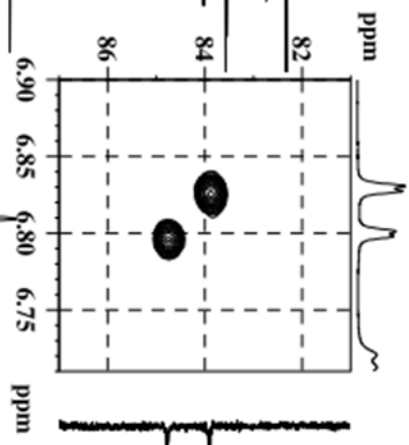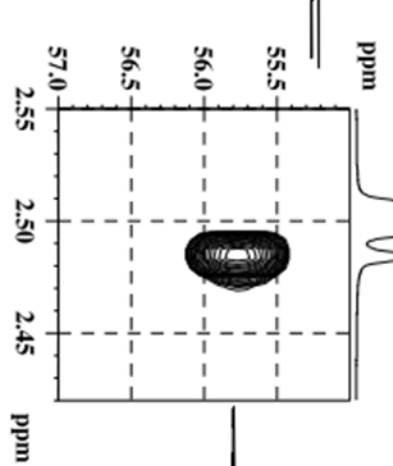



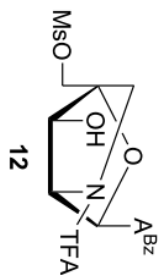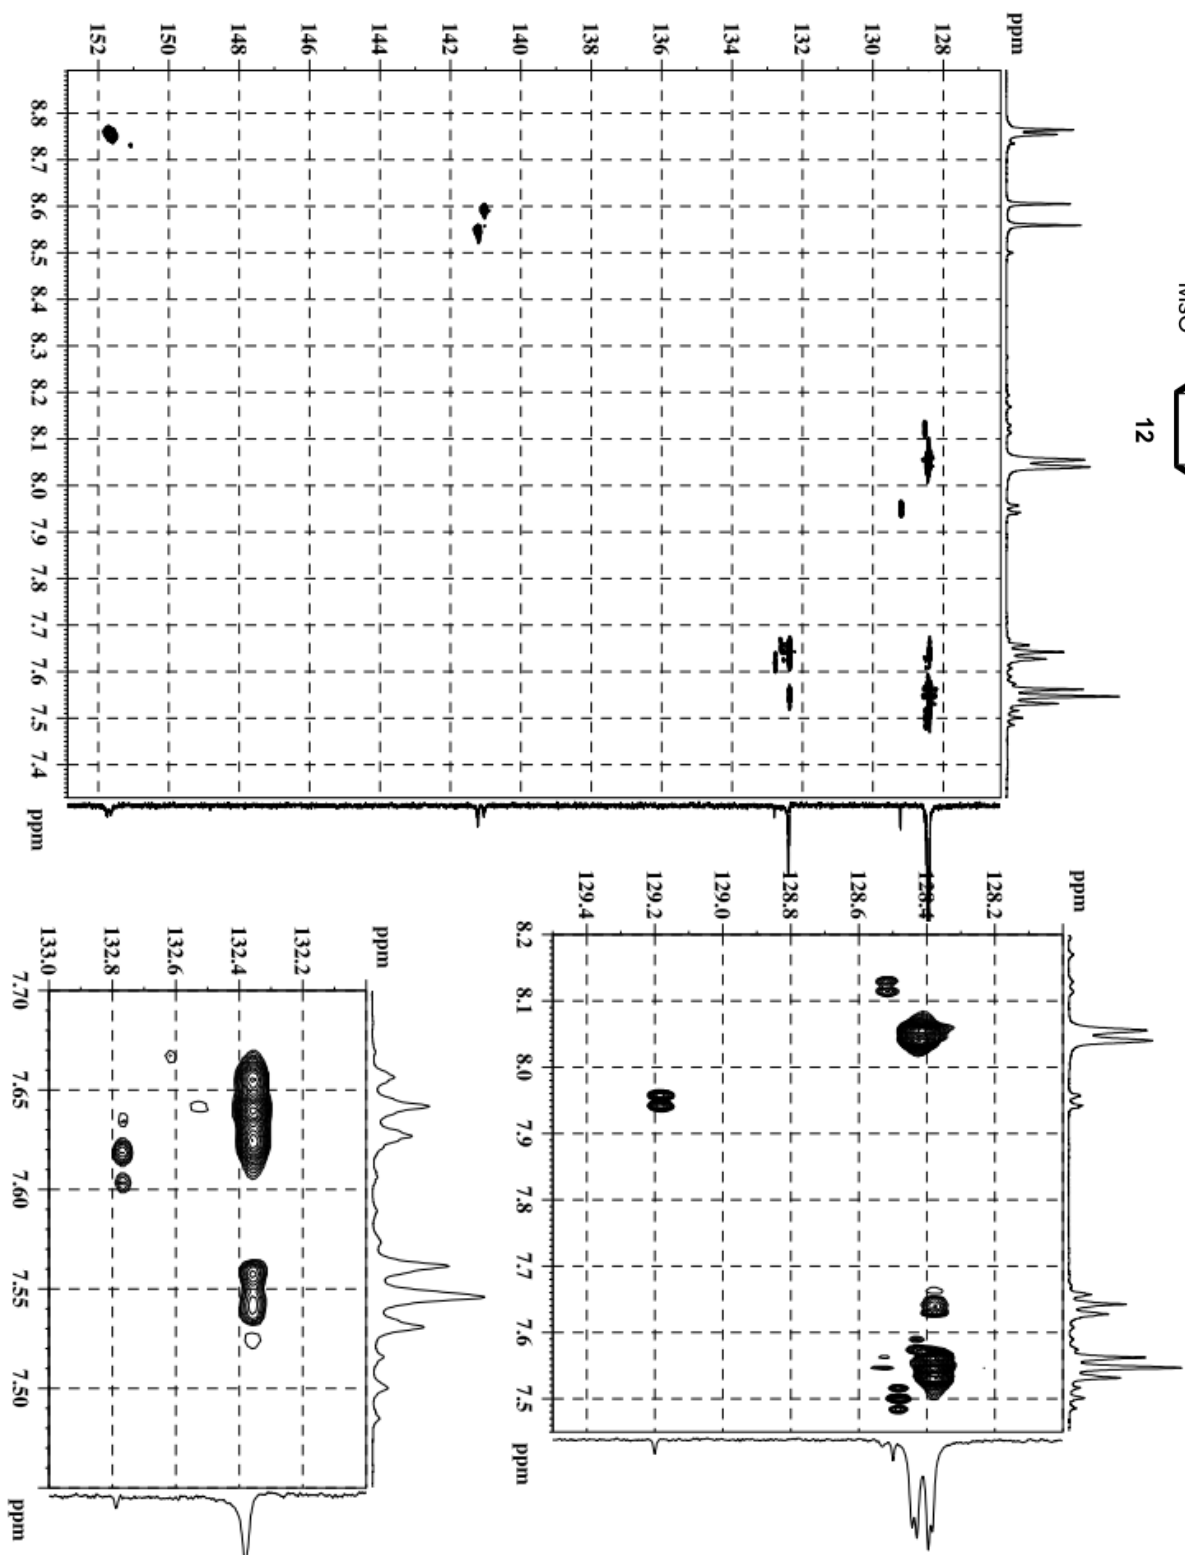

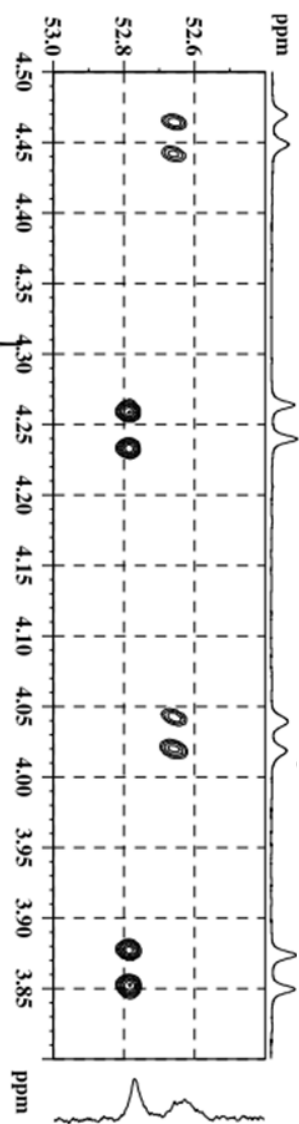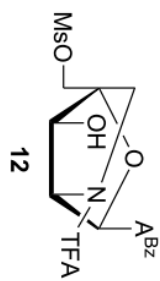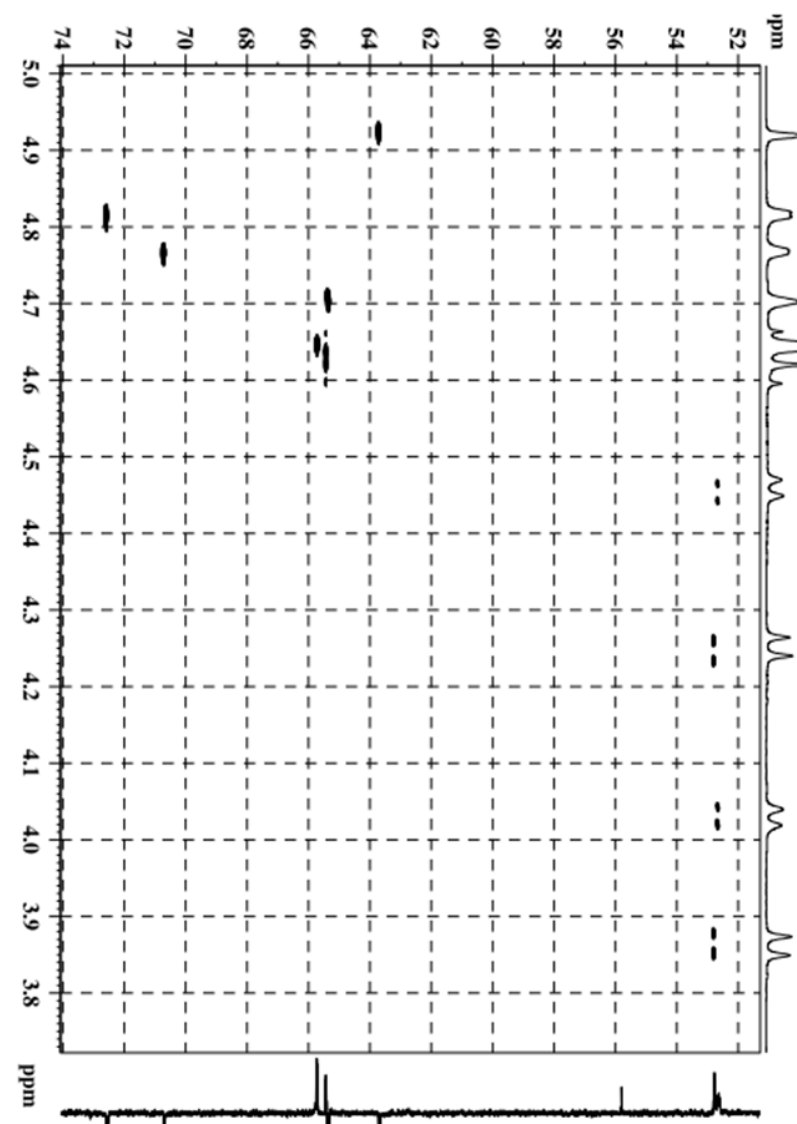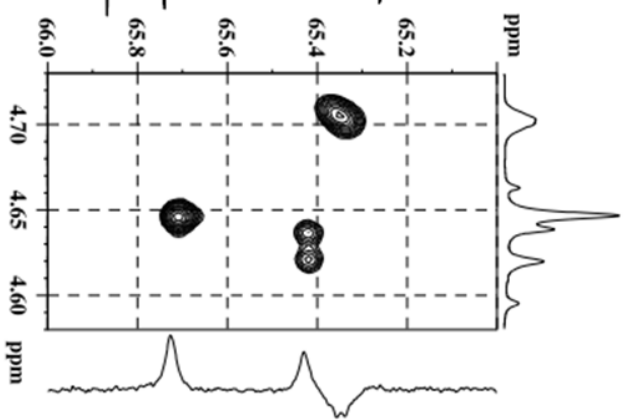

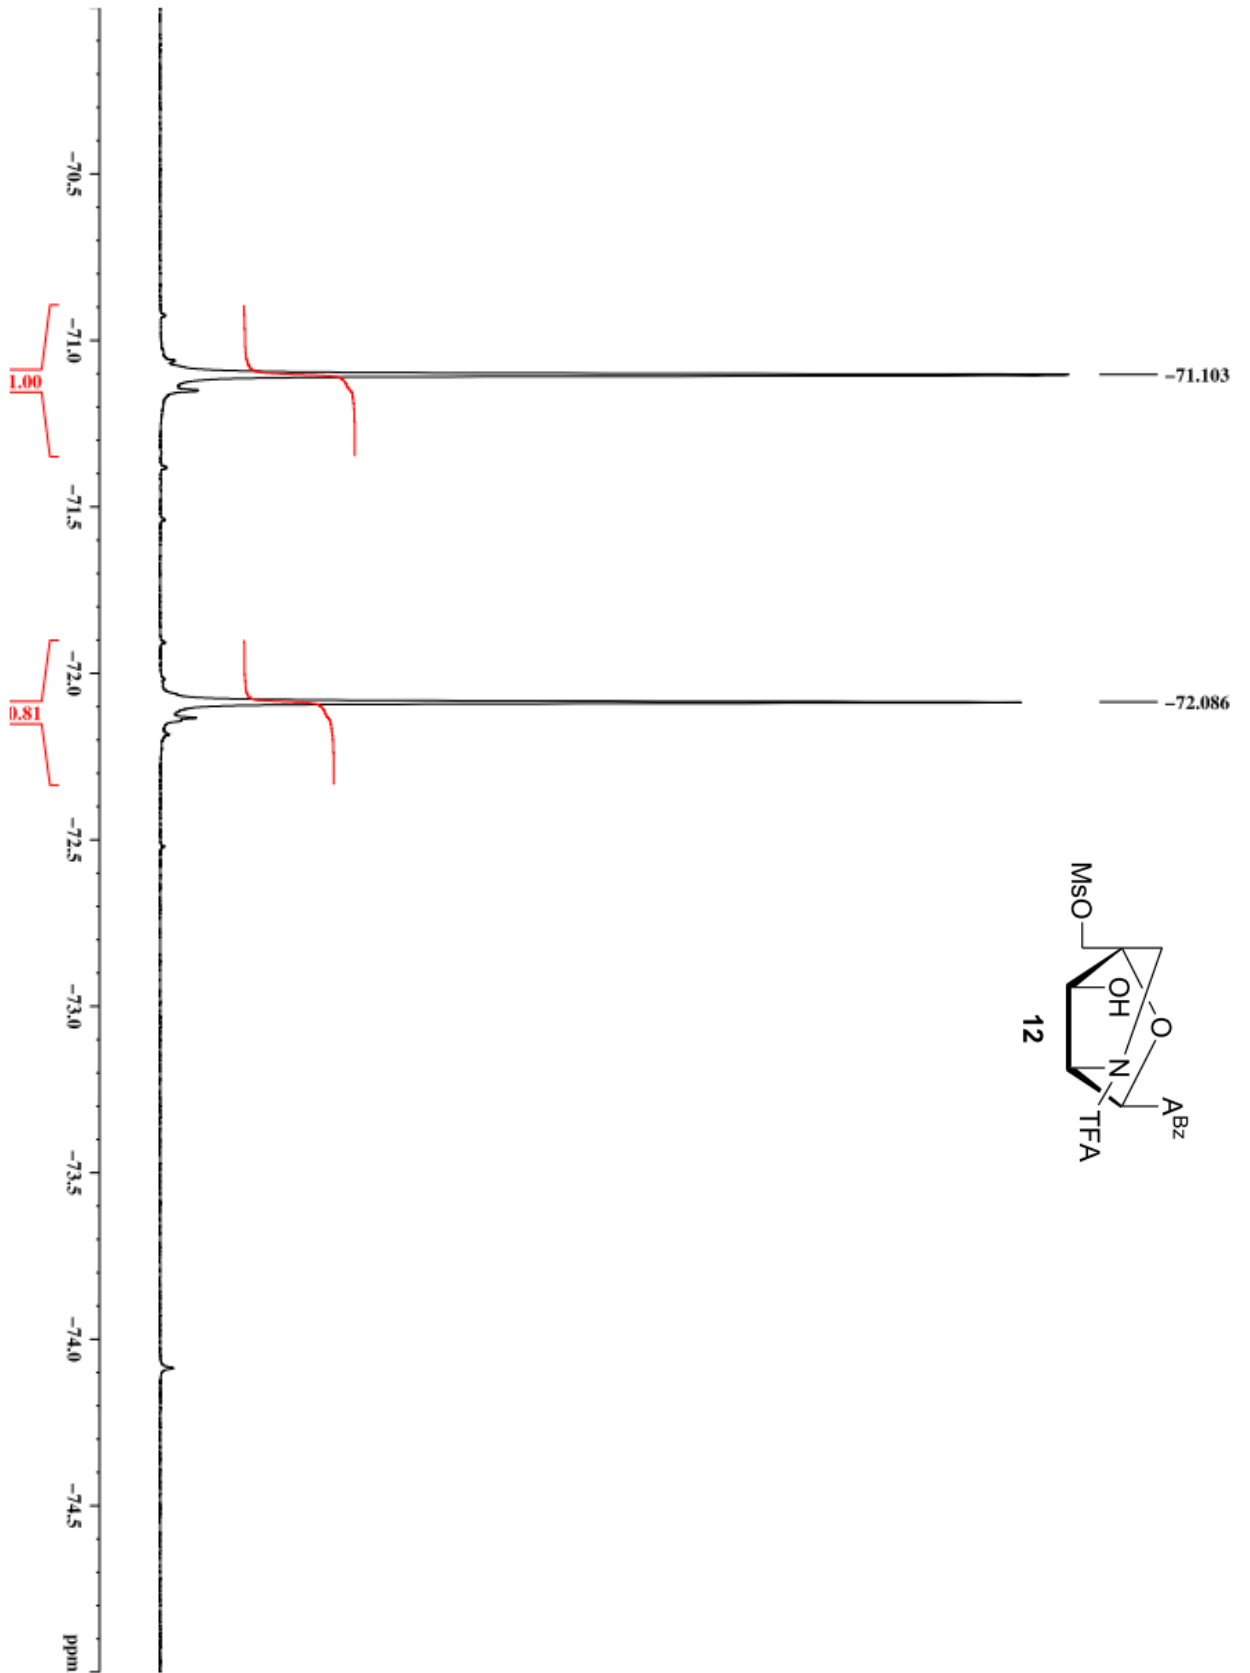



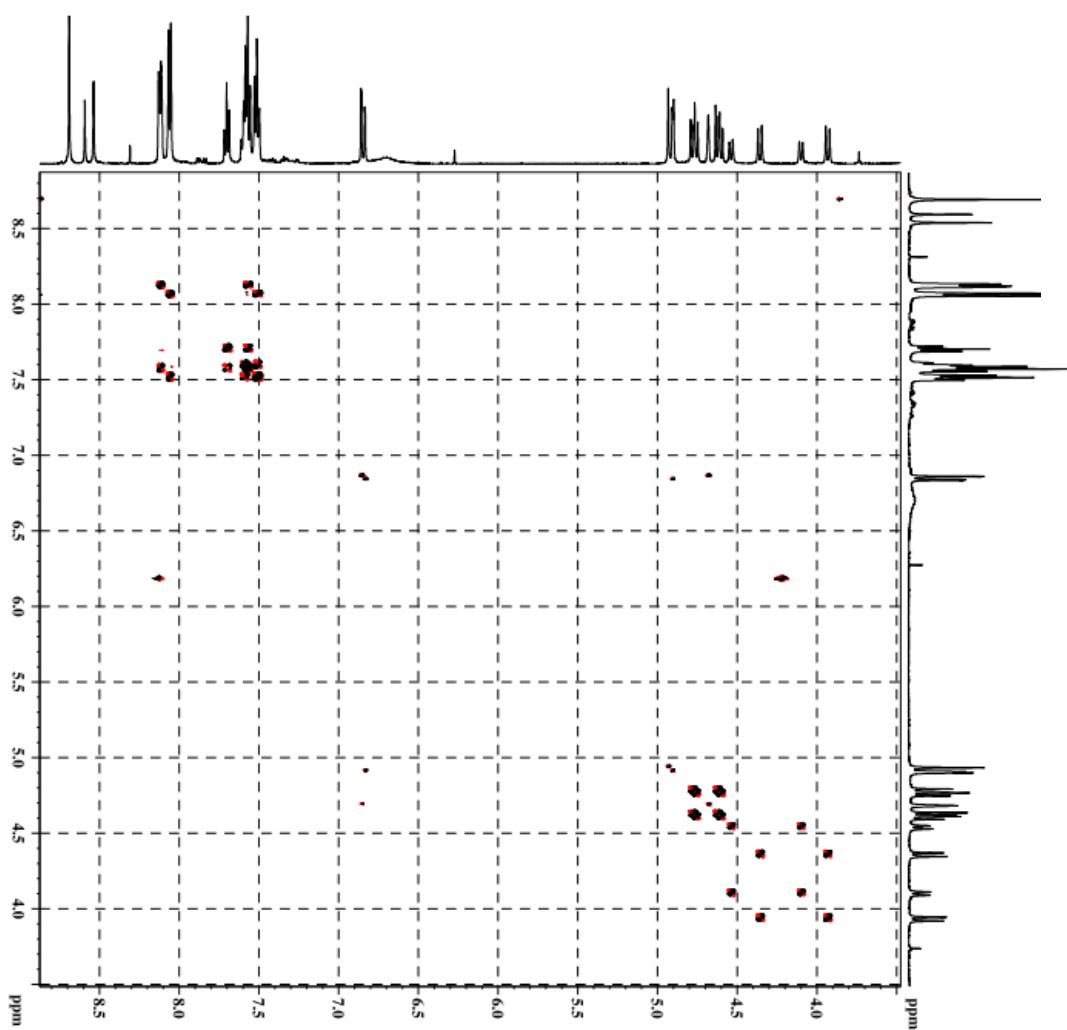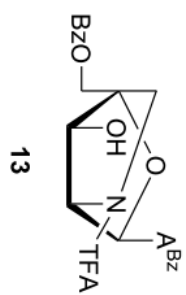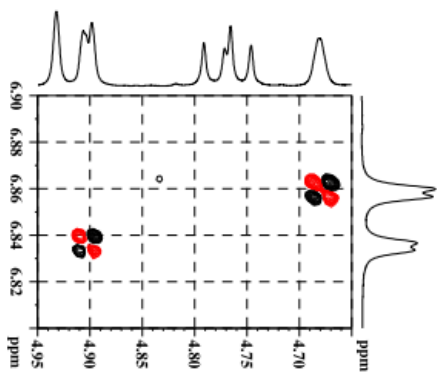

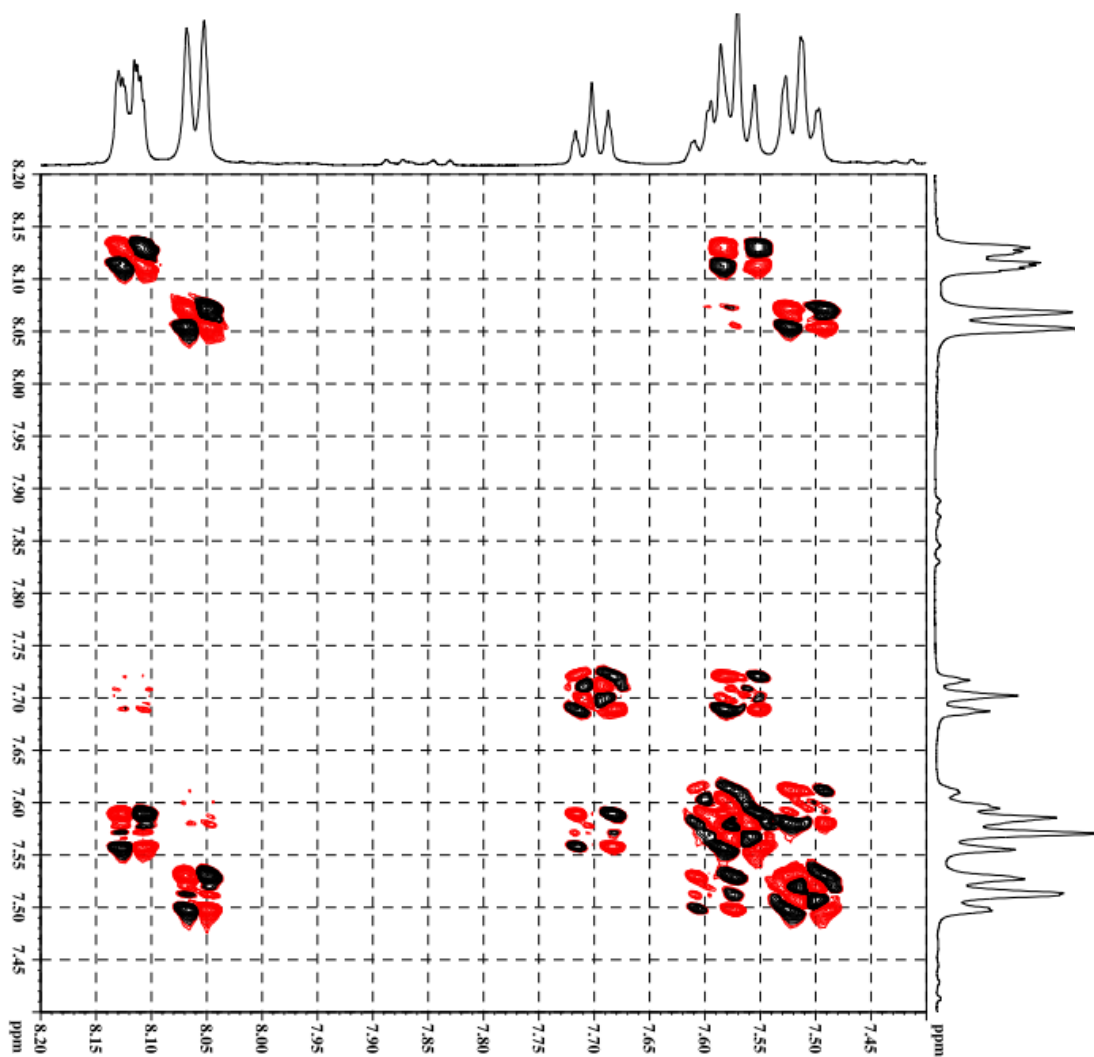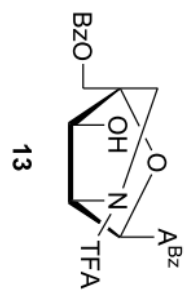

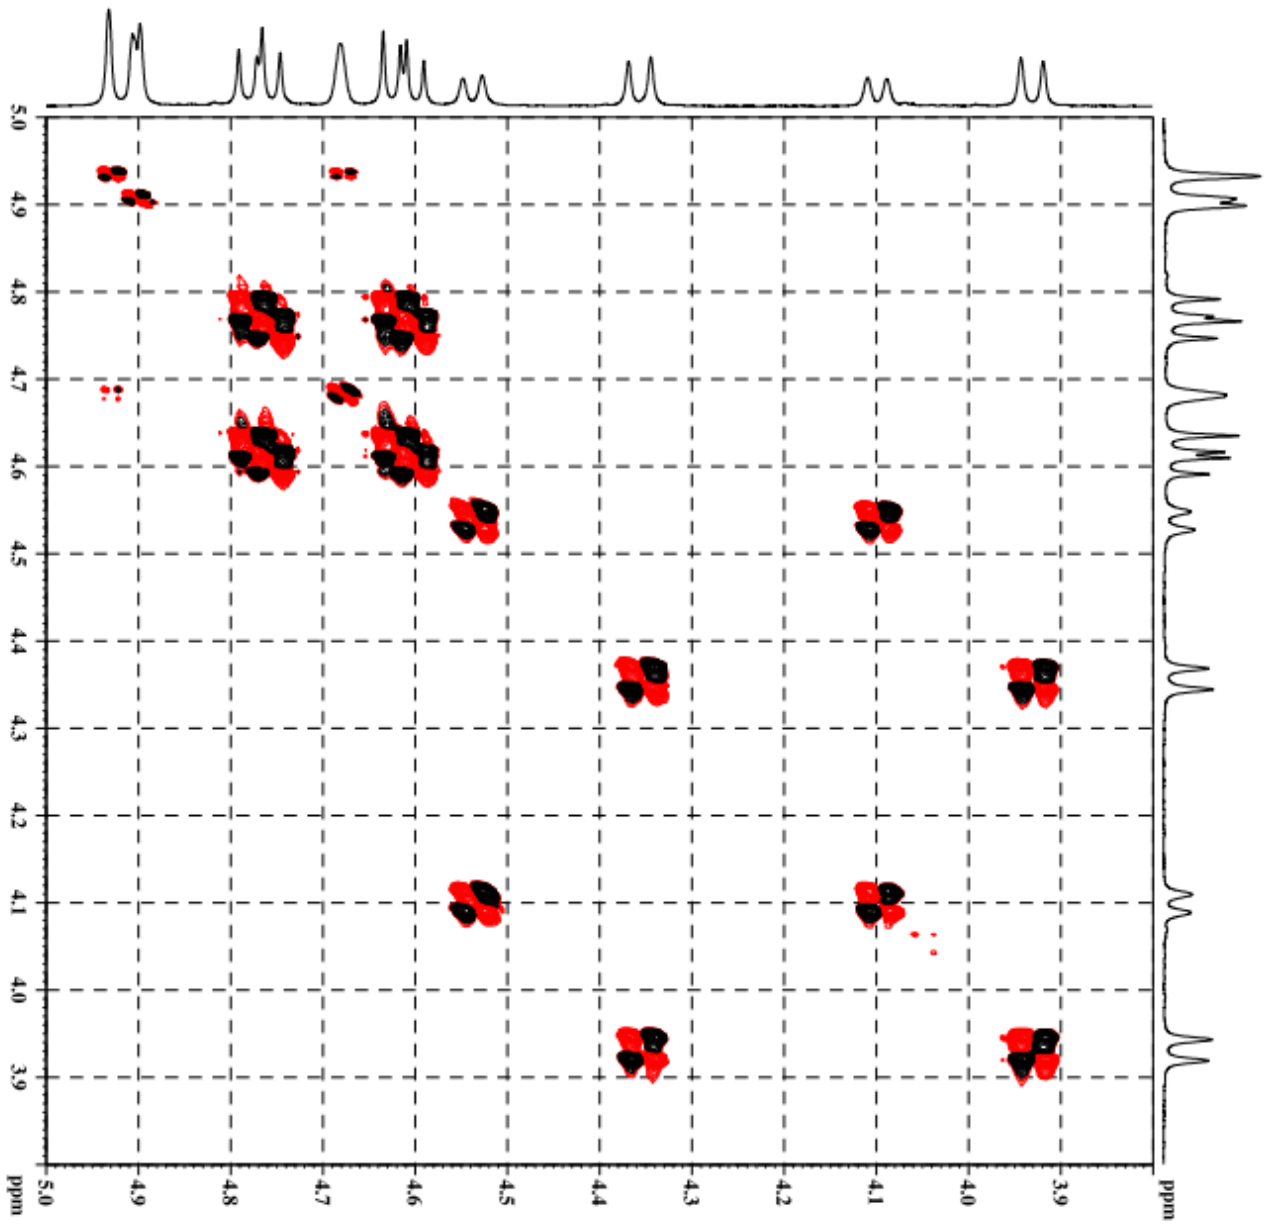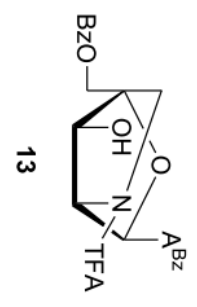

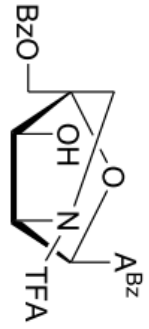

13

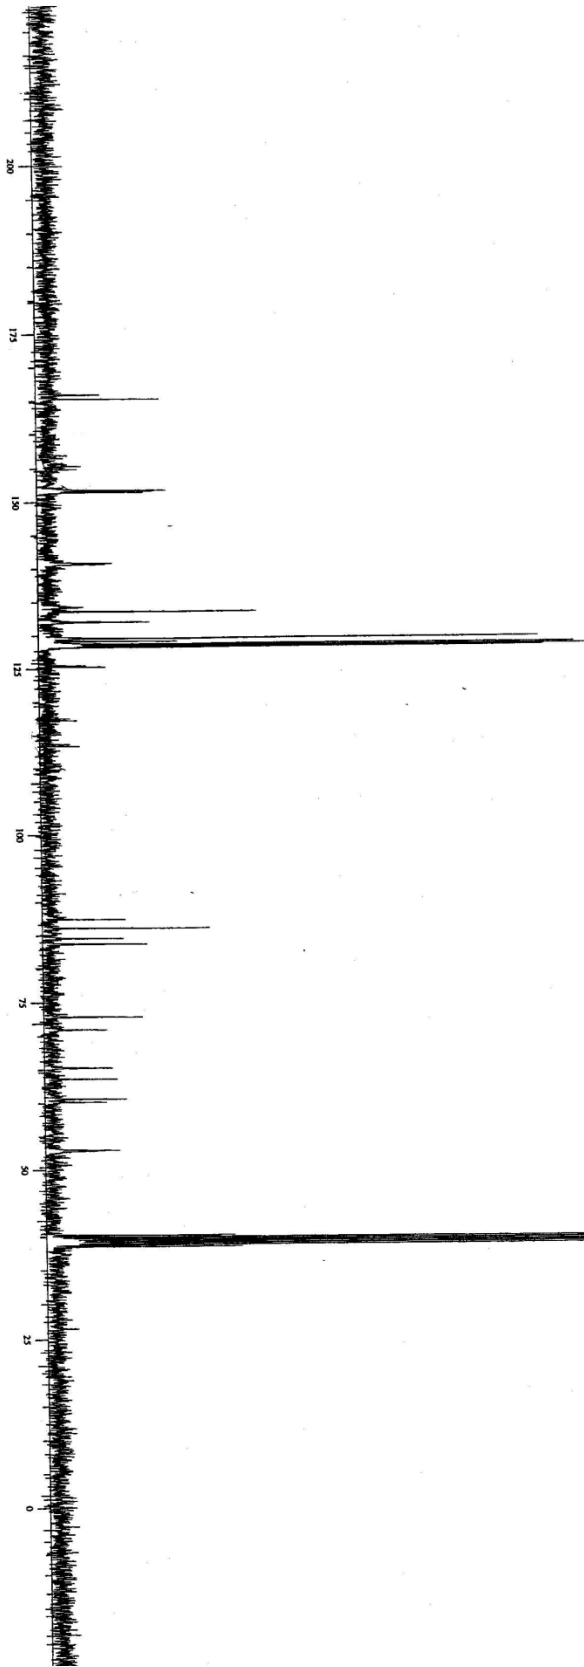



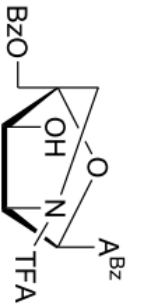

13

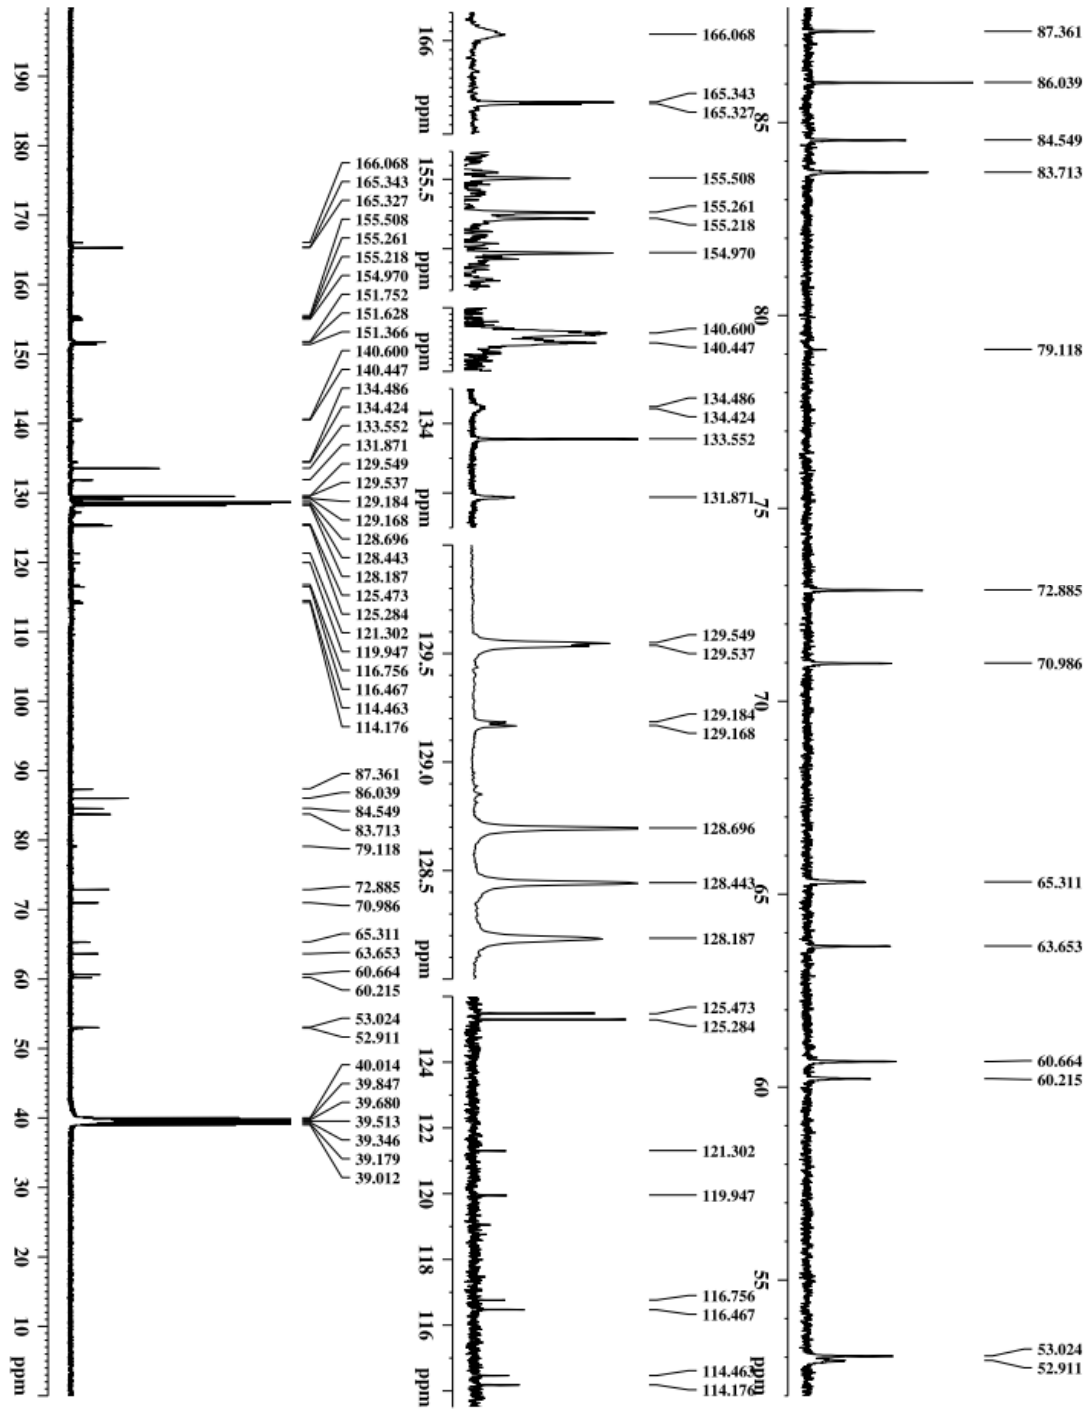

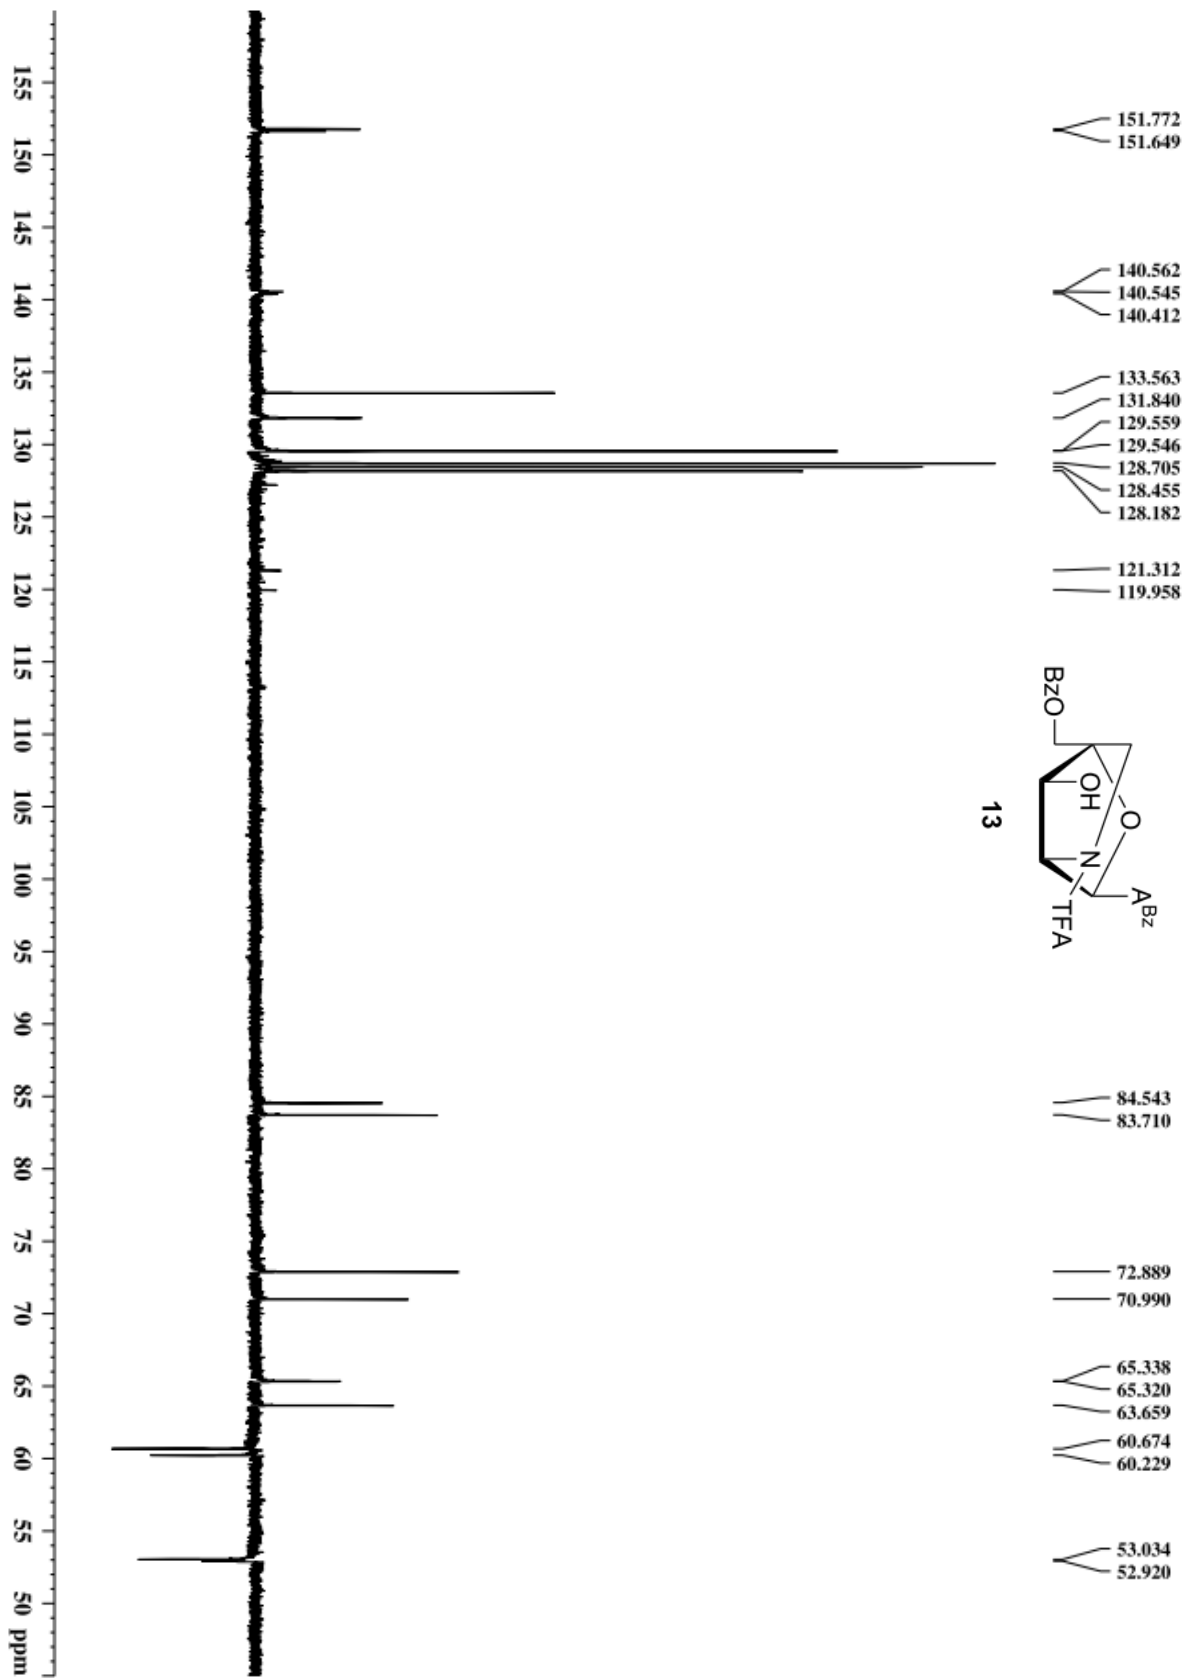

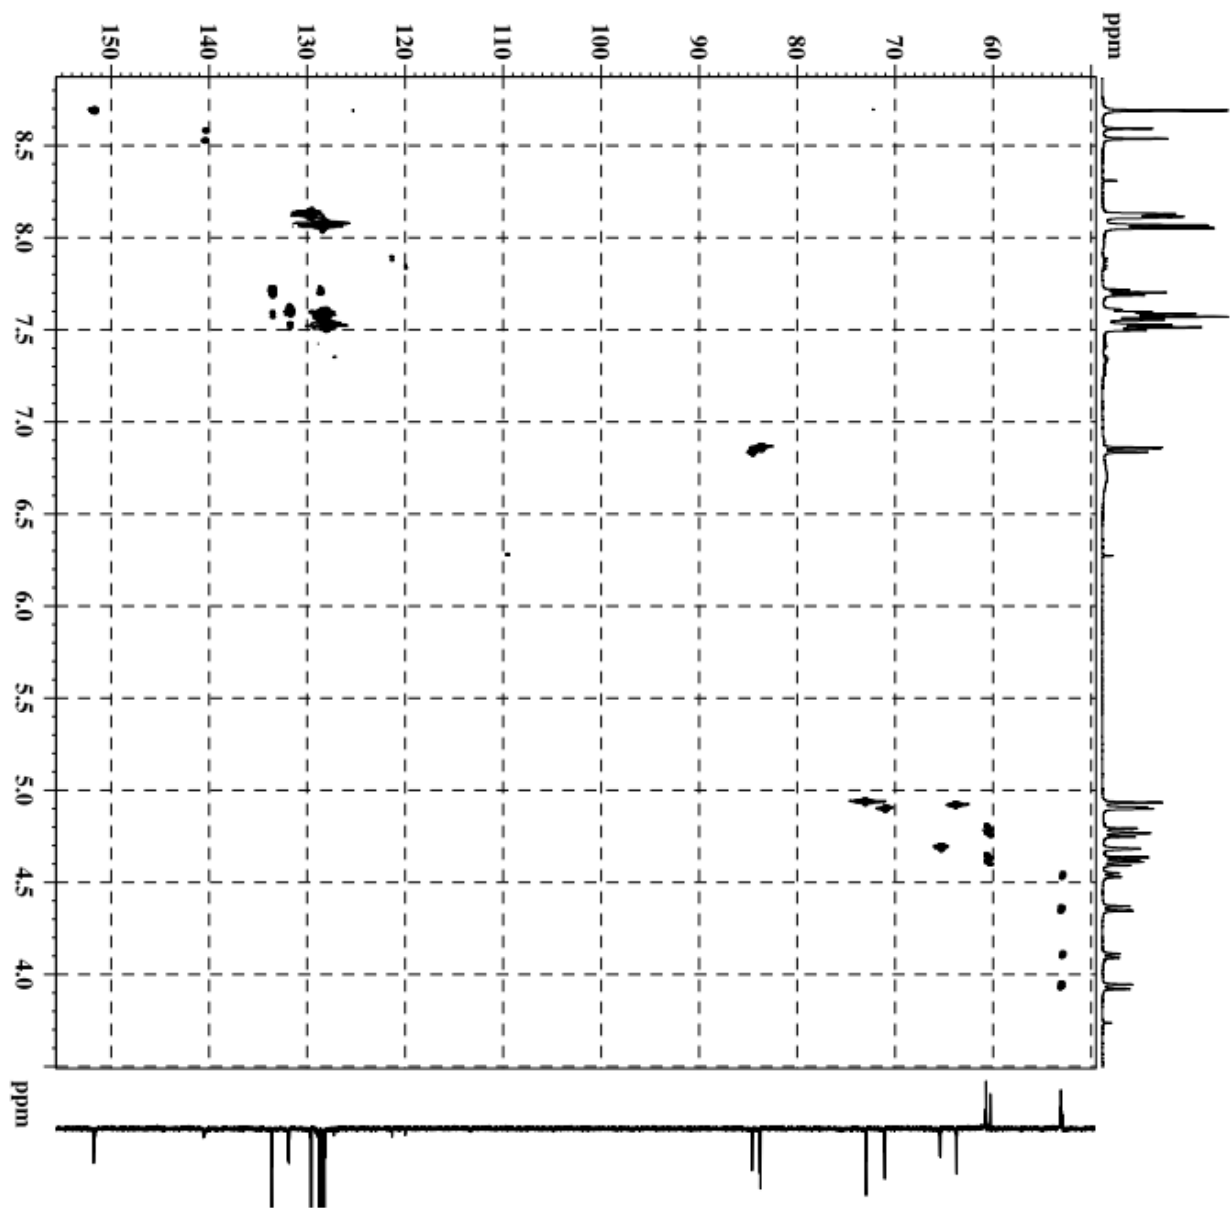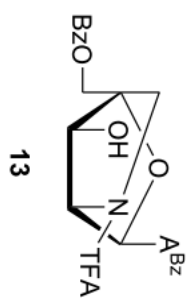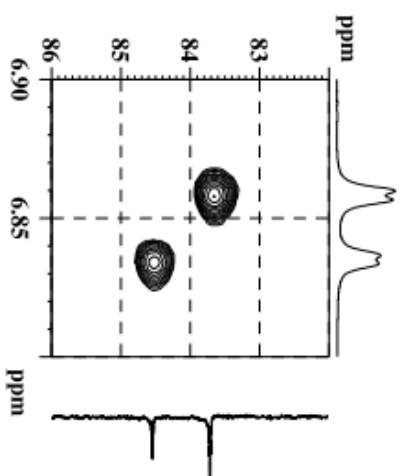

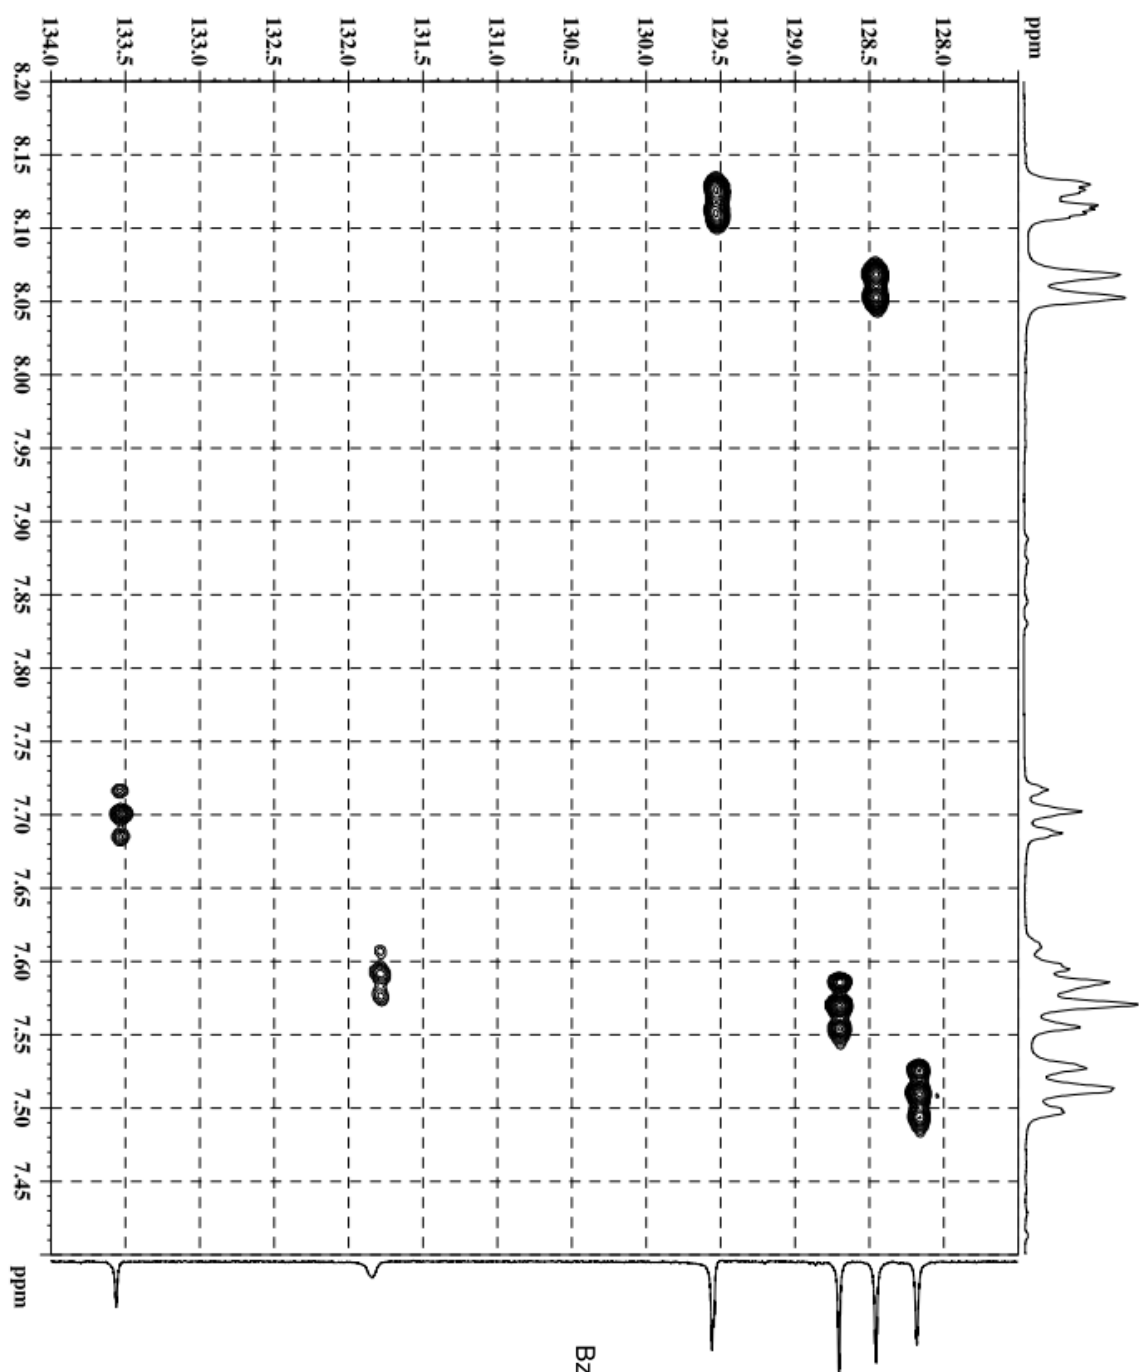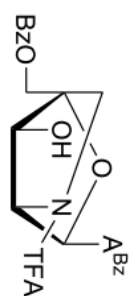

13

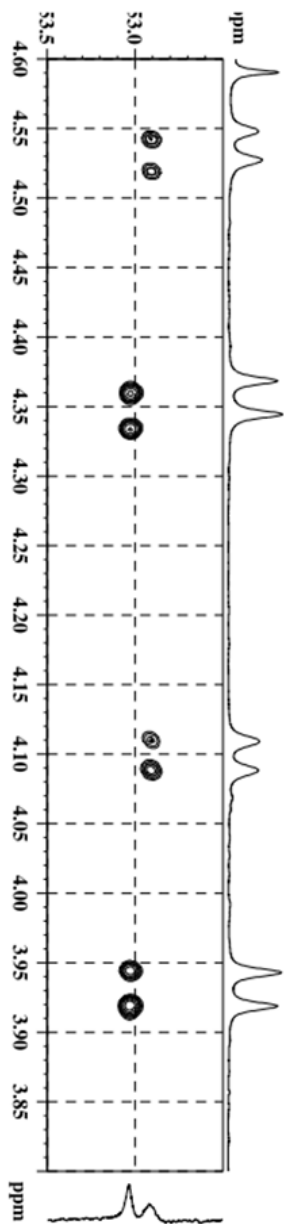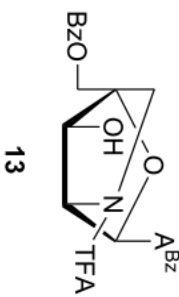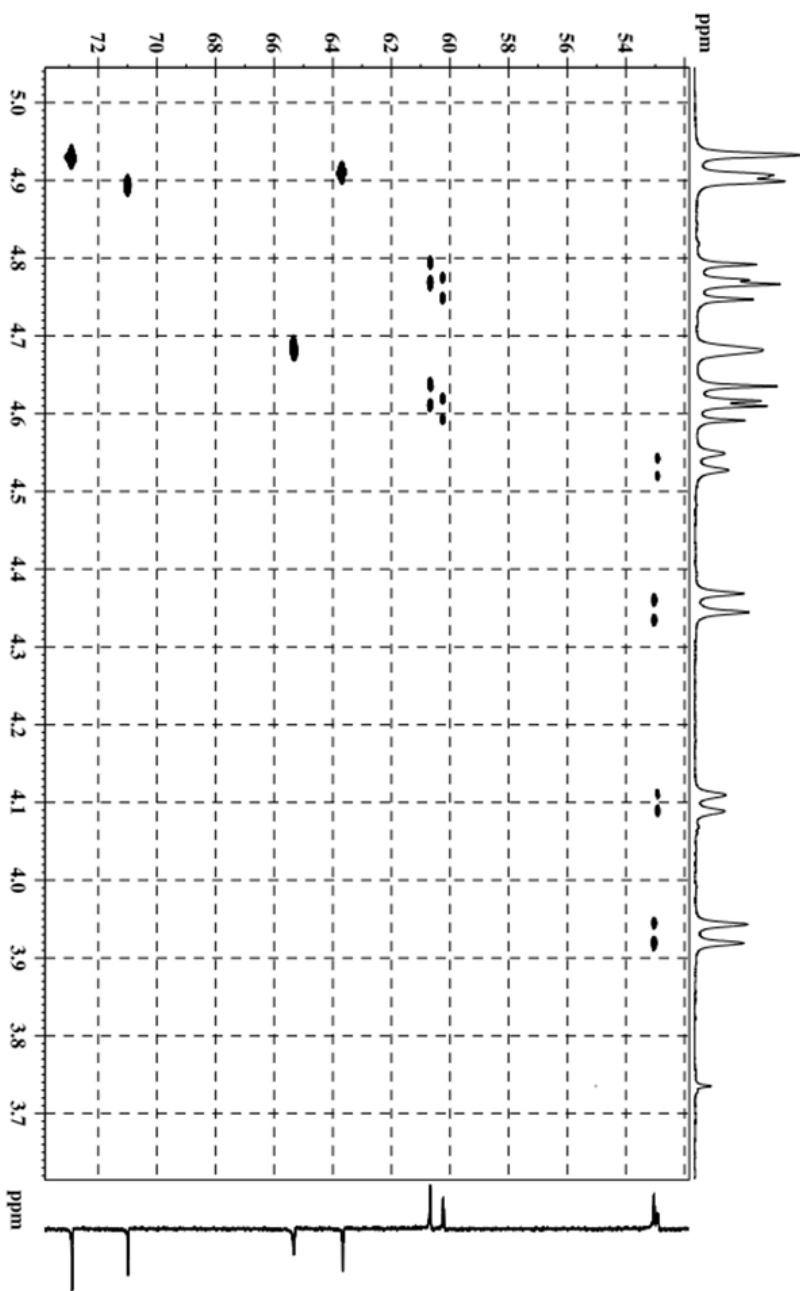

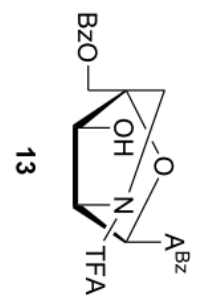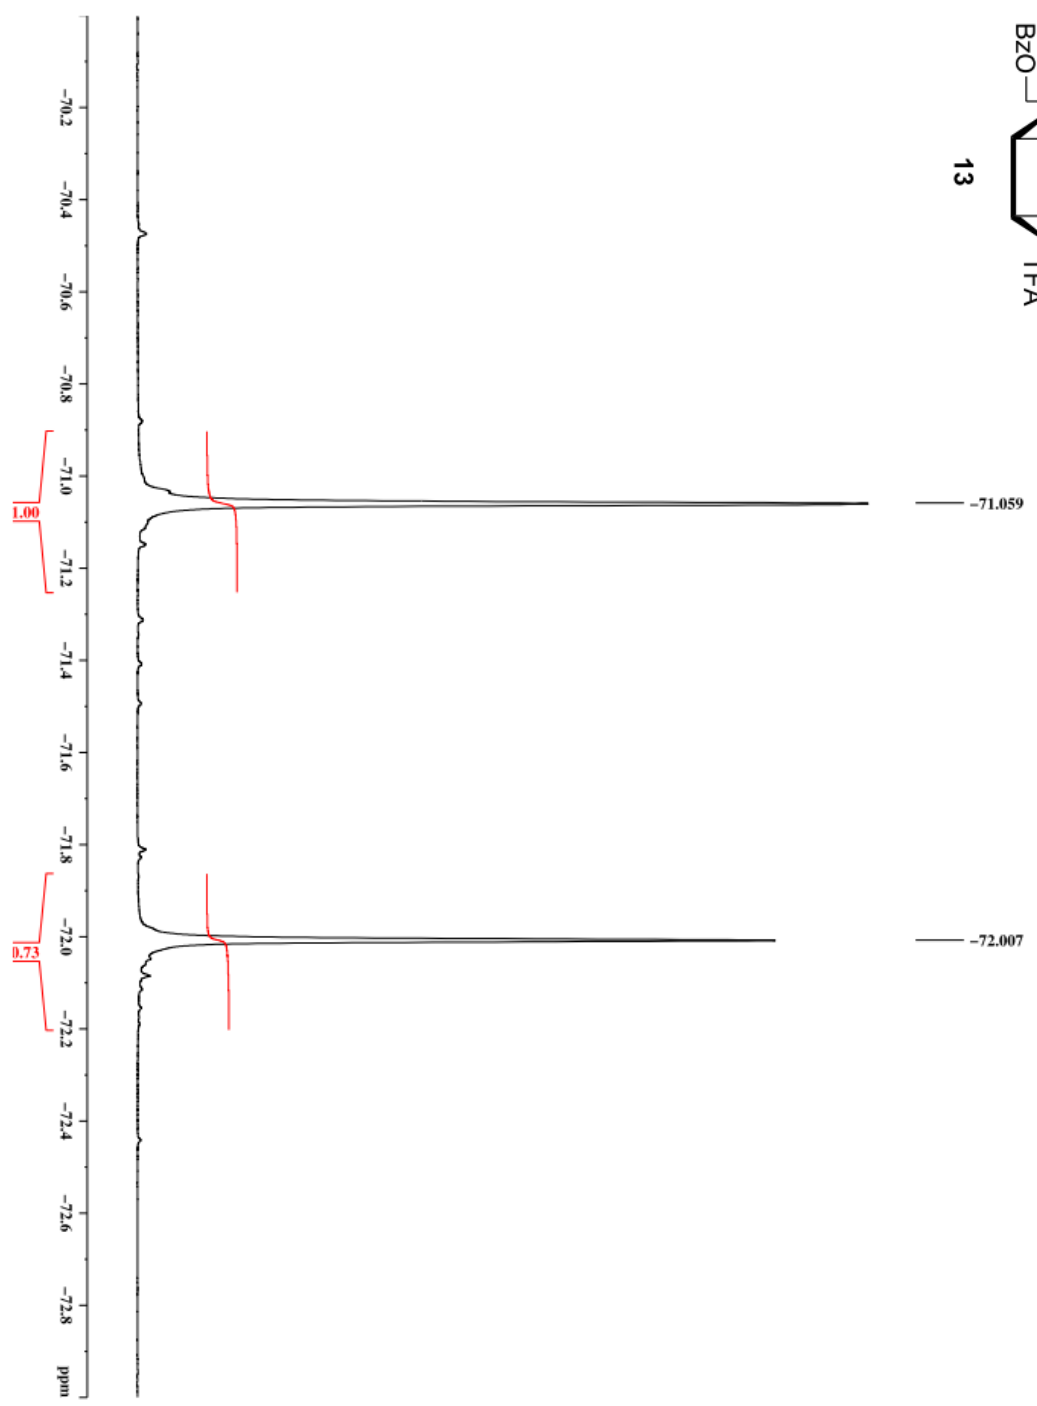

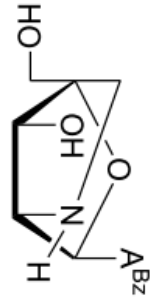

14

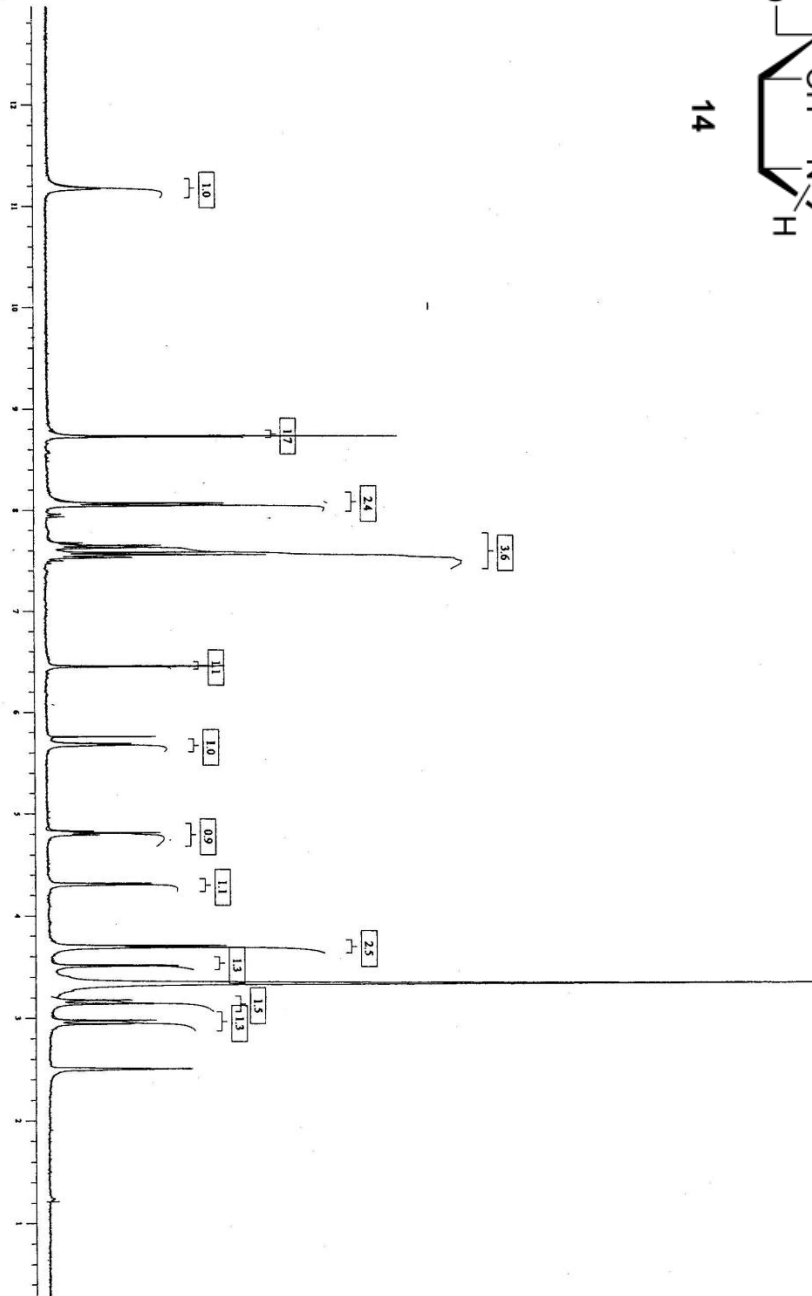

D<sub>2</sub>O  
exchange

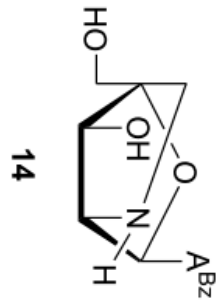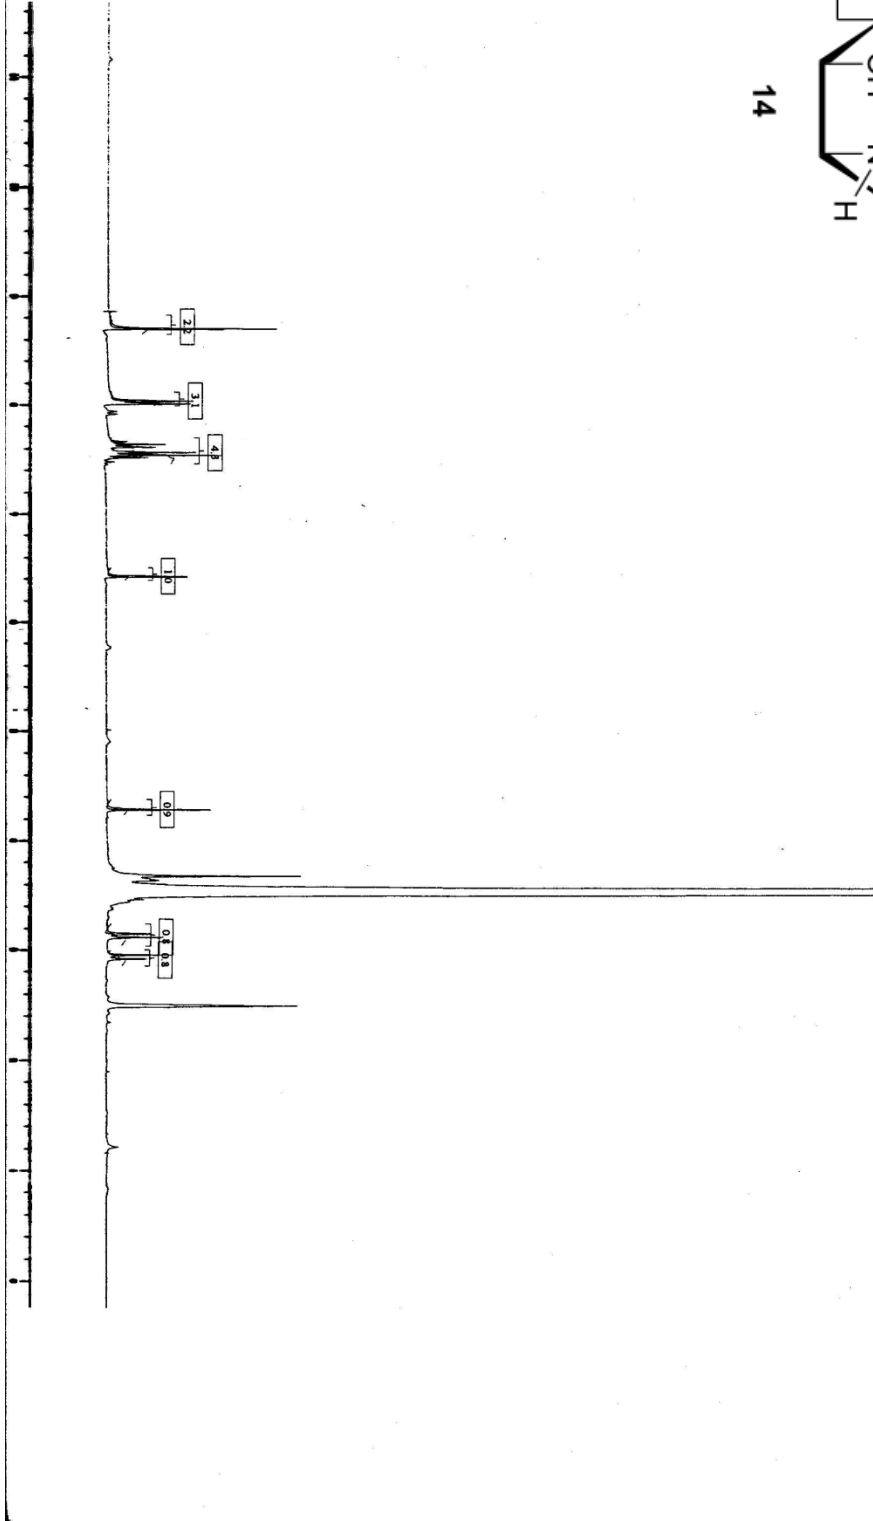



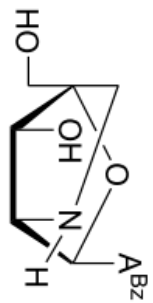

14

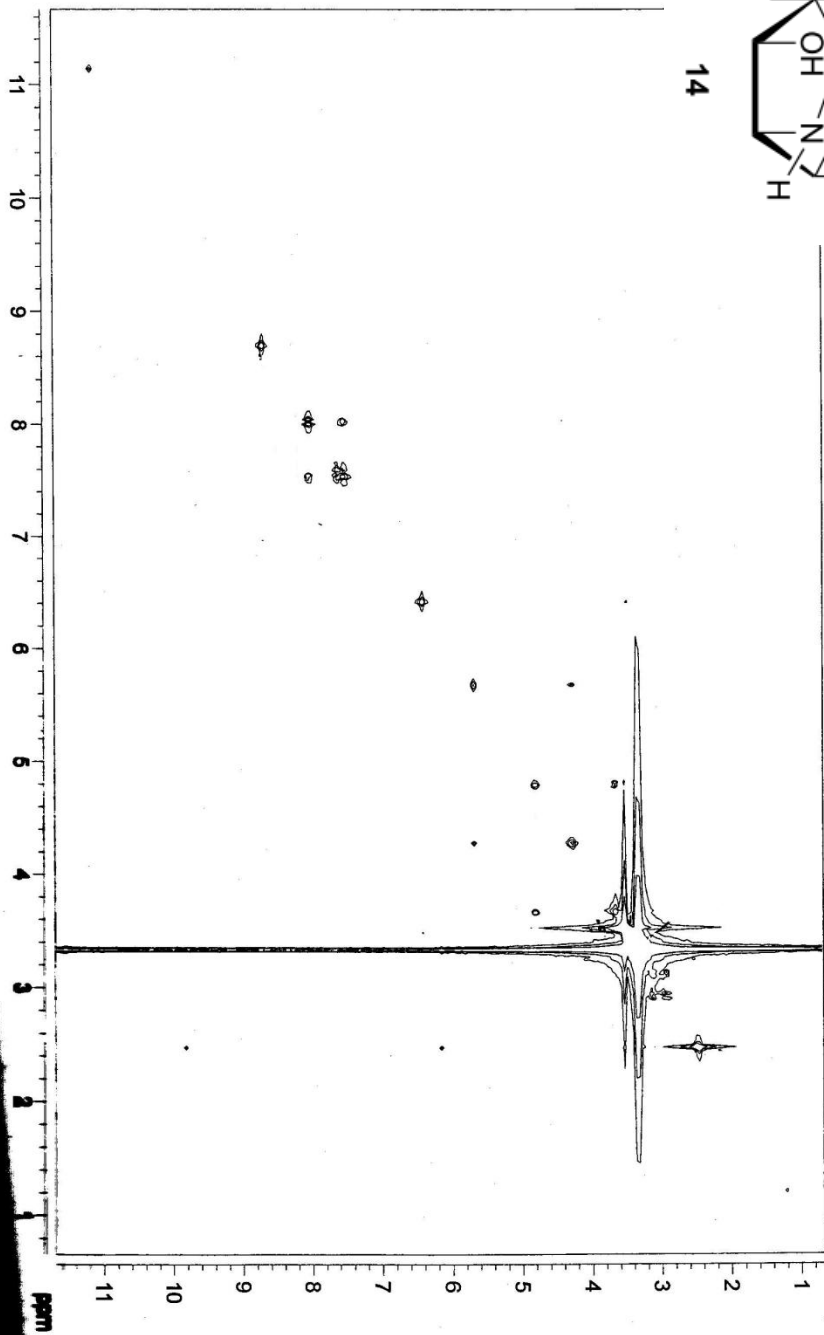

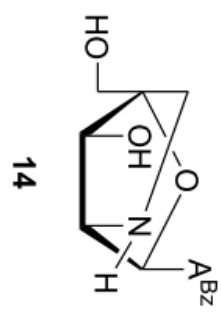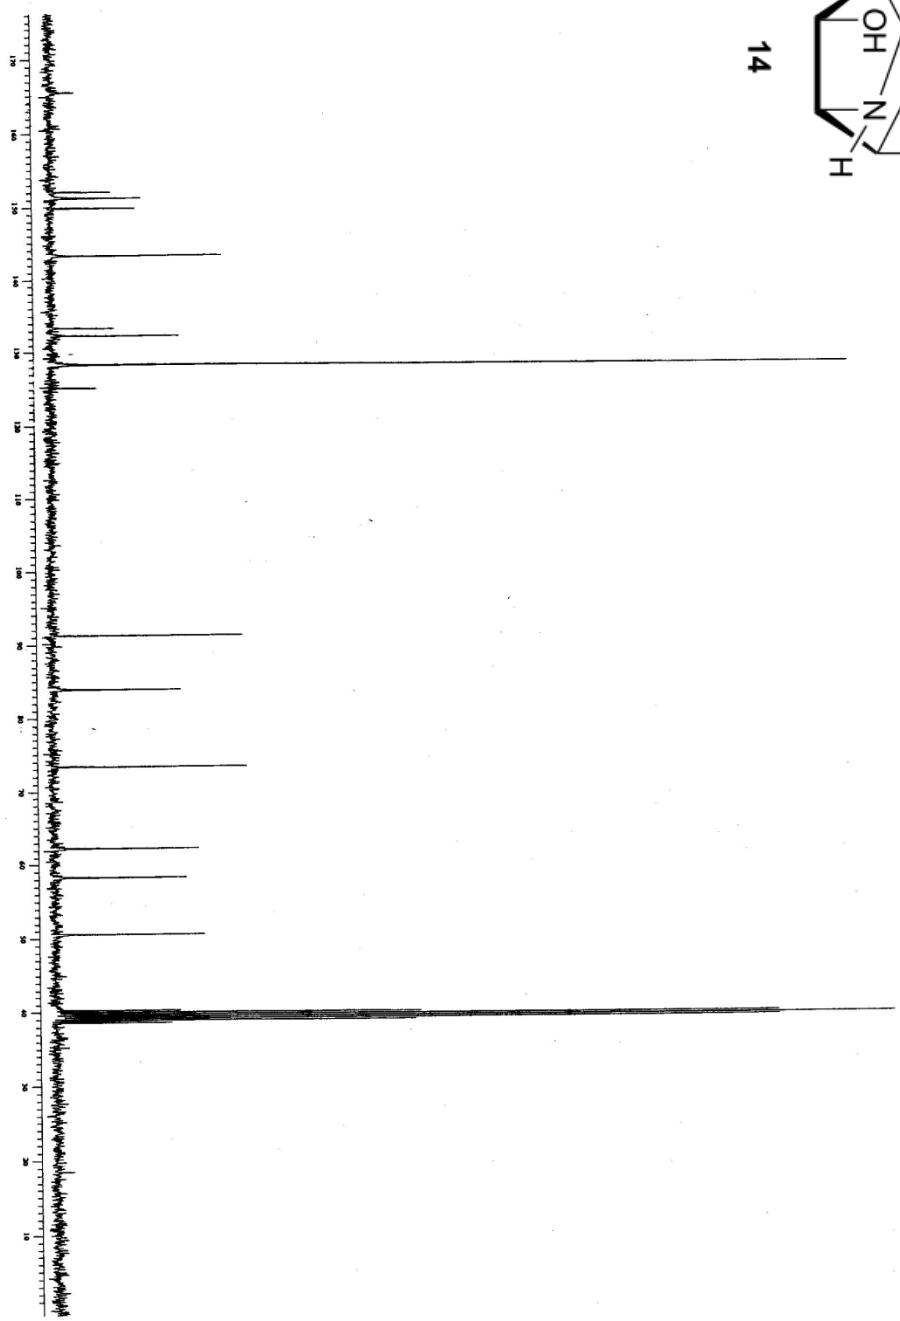

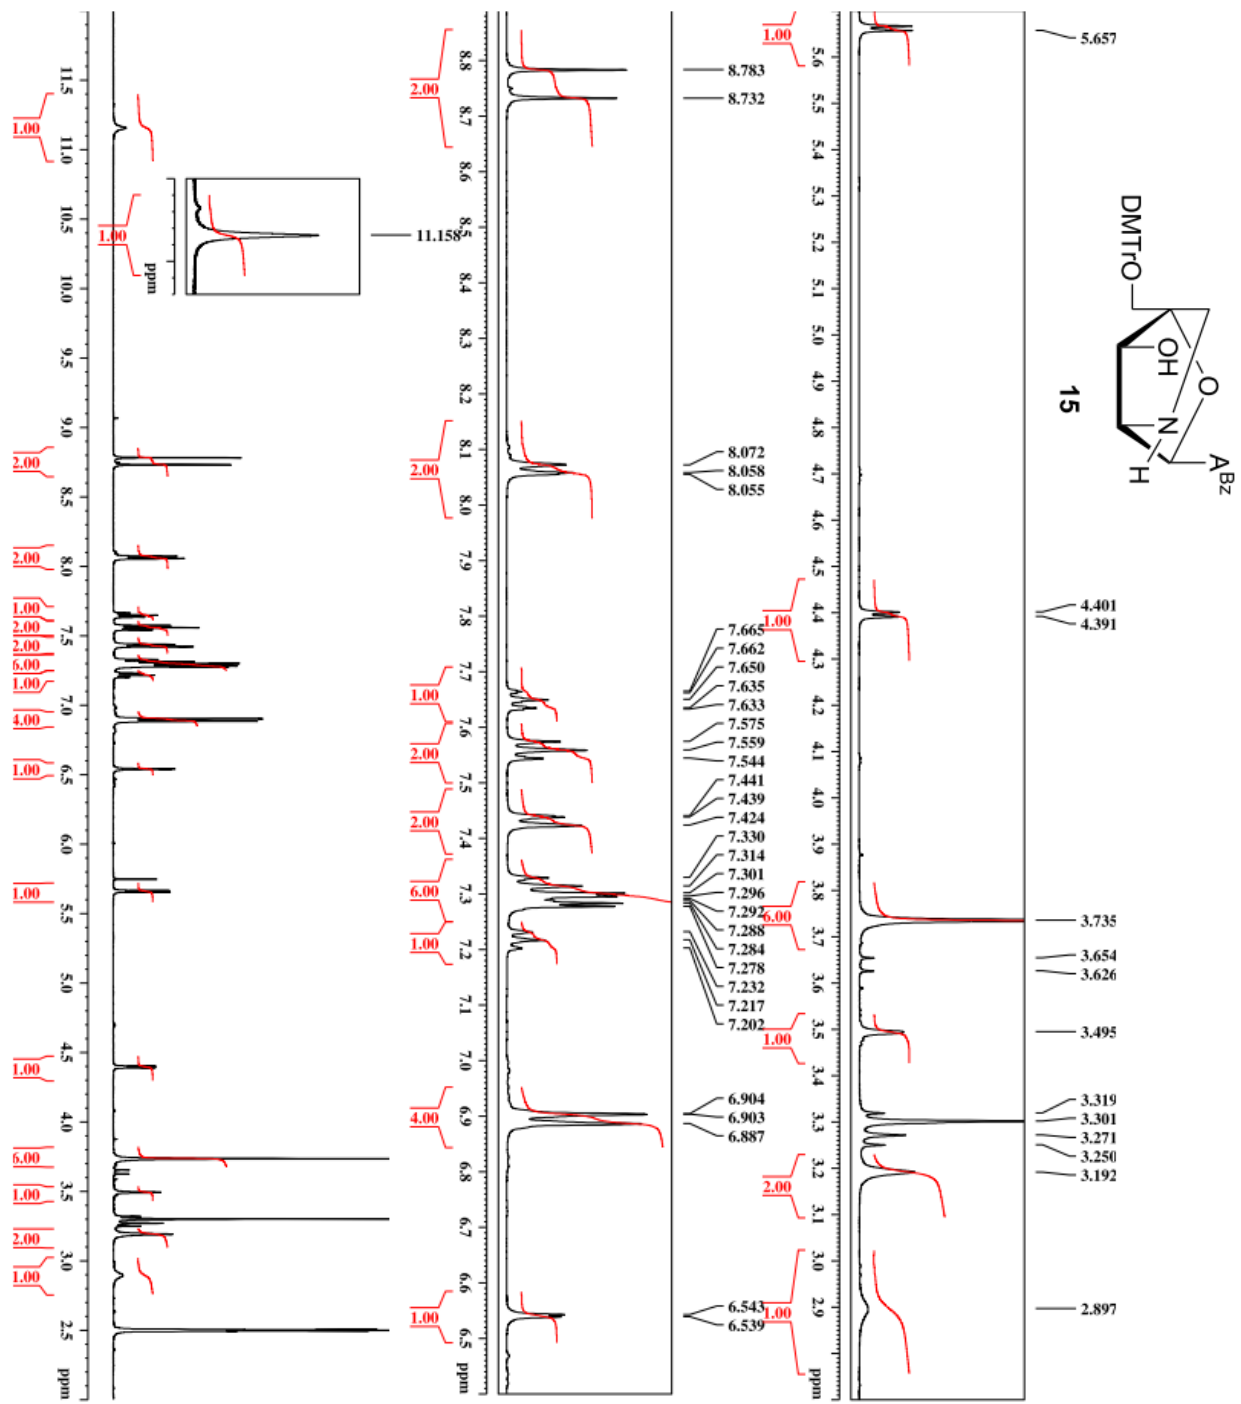

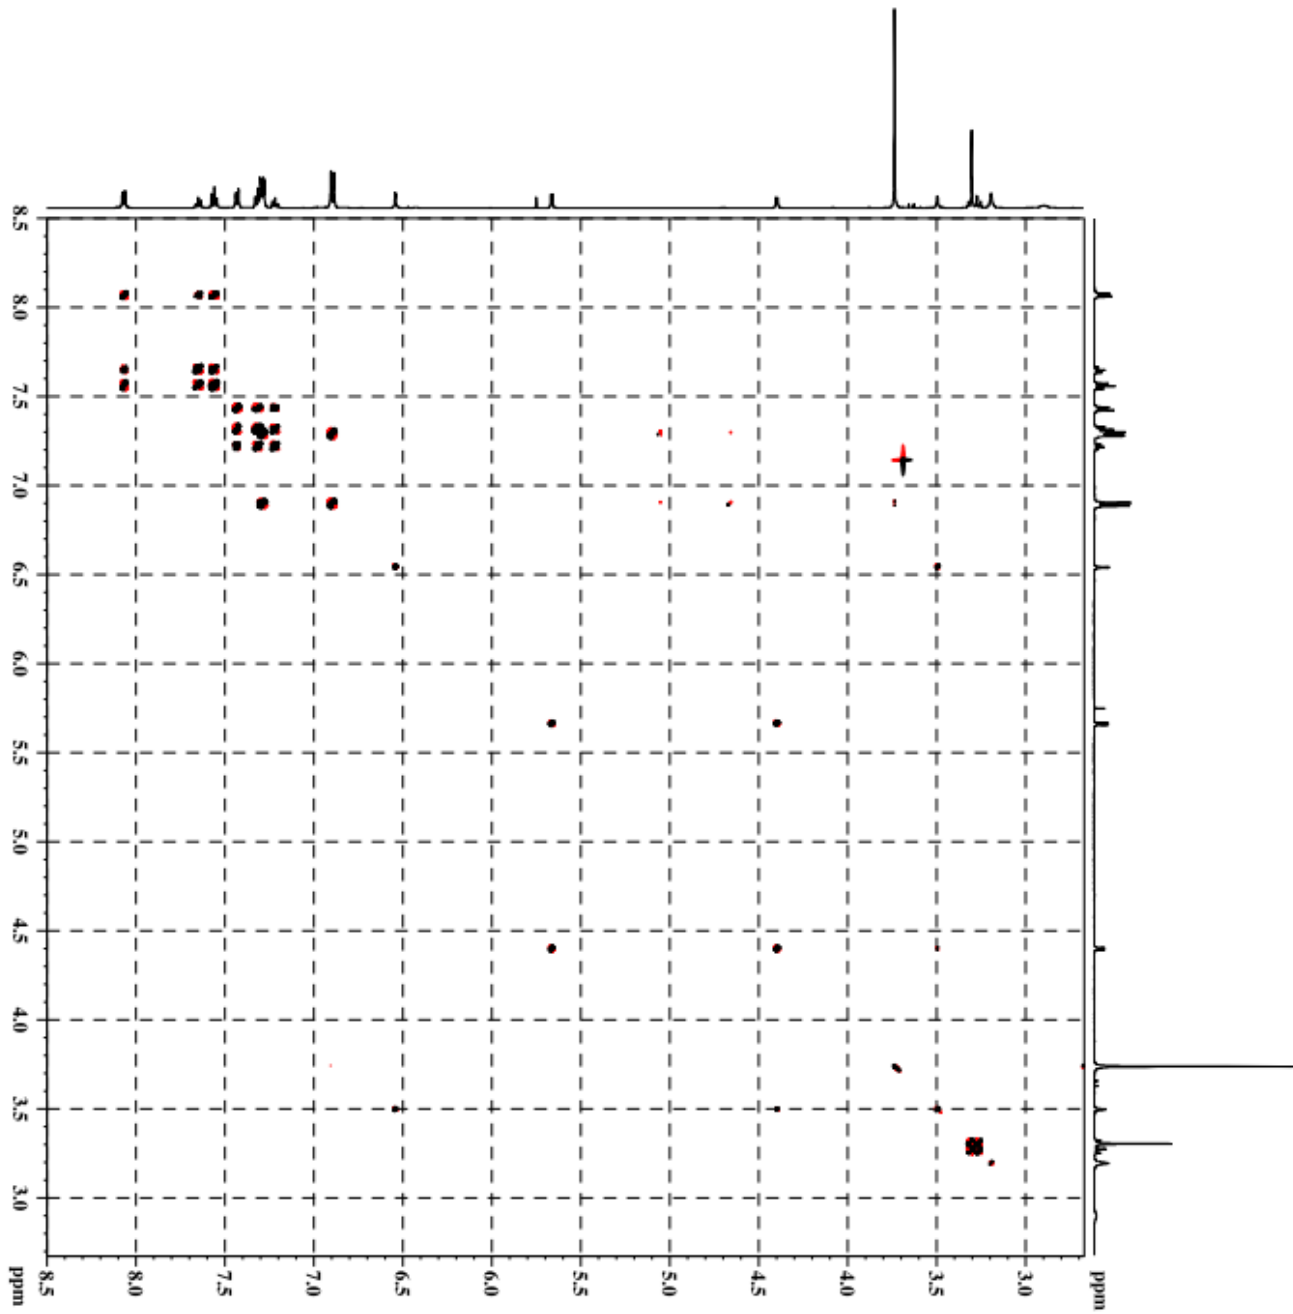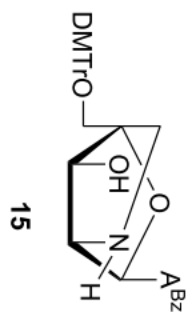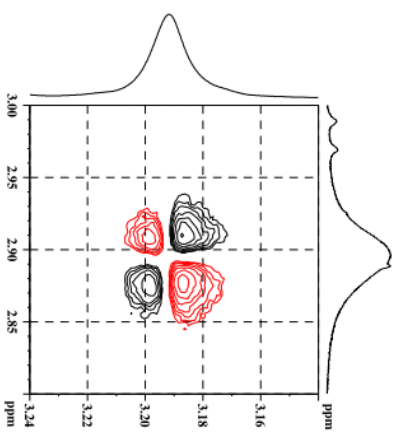

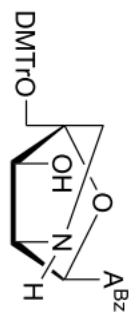

15

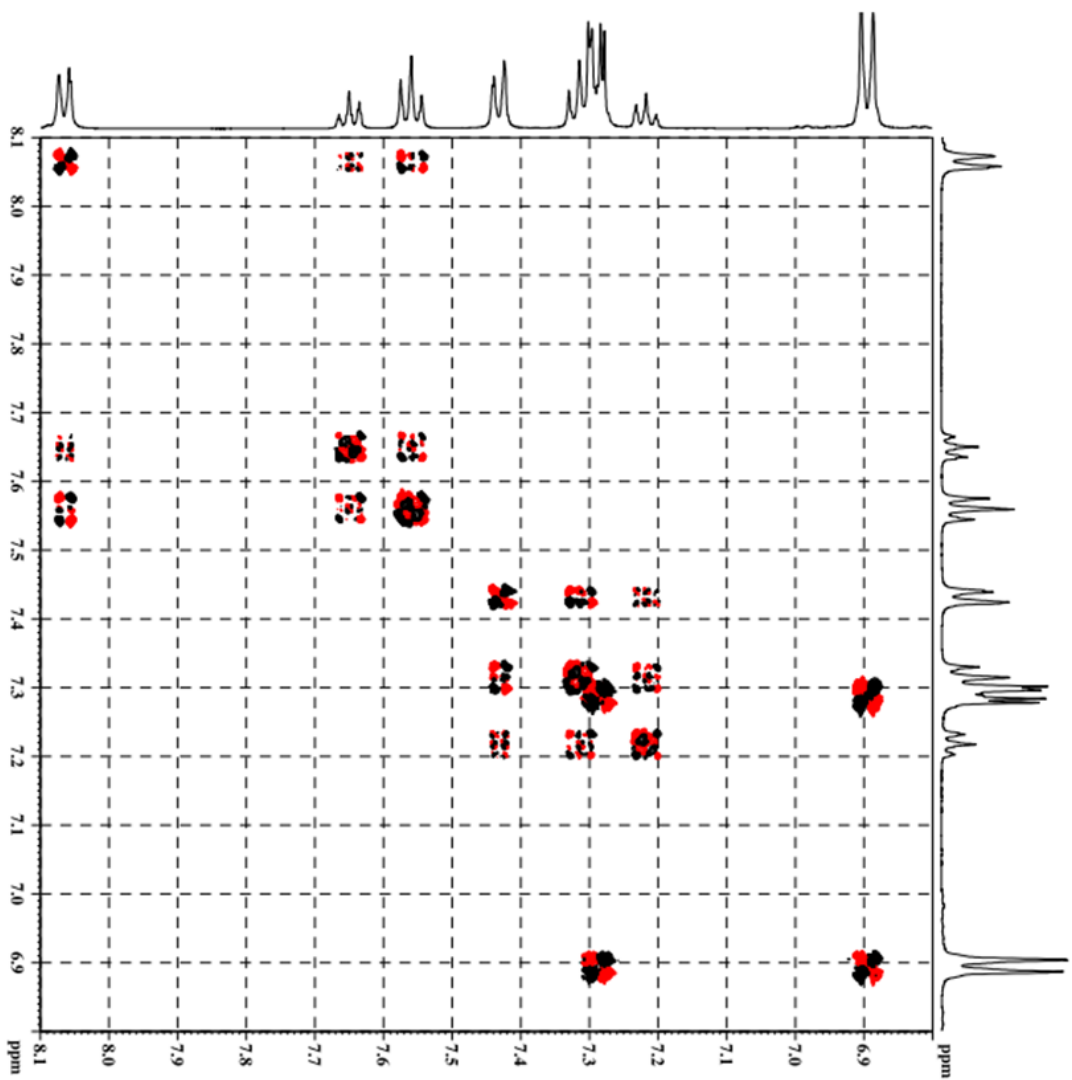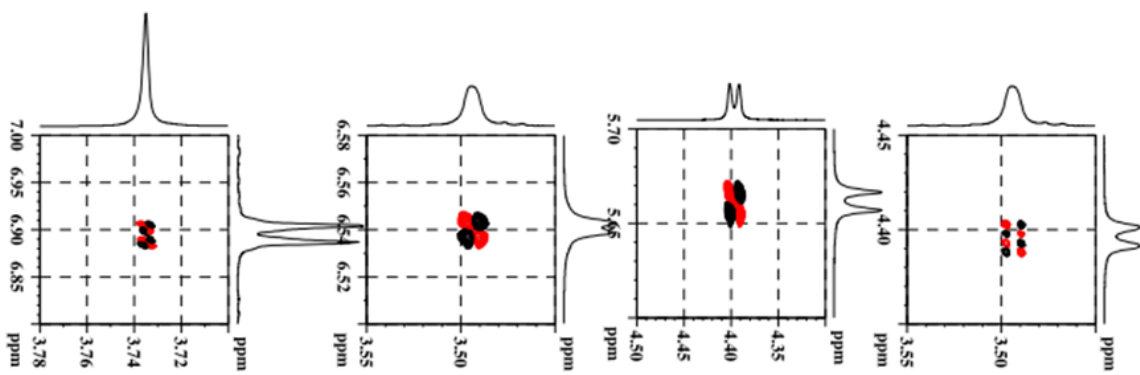

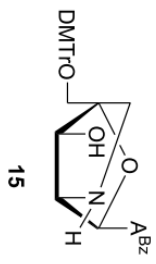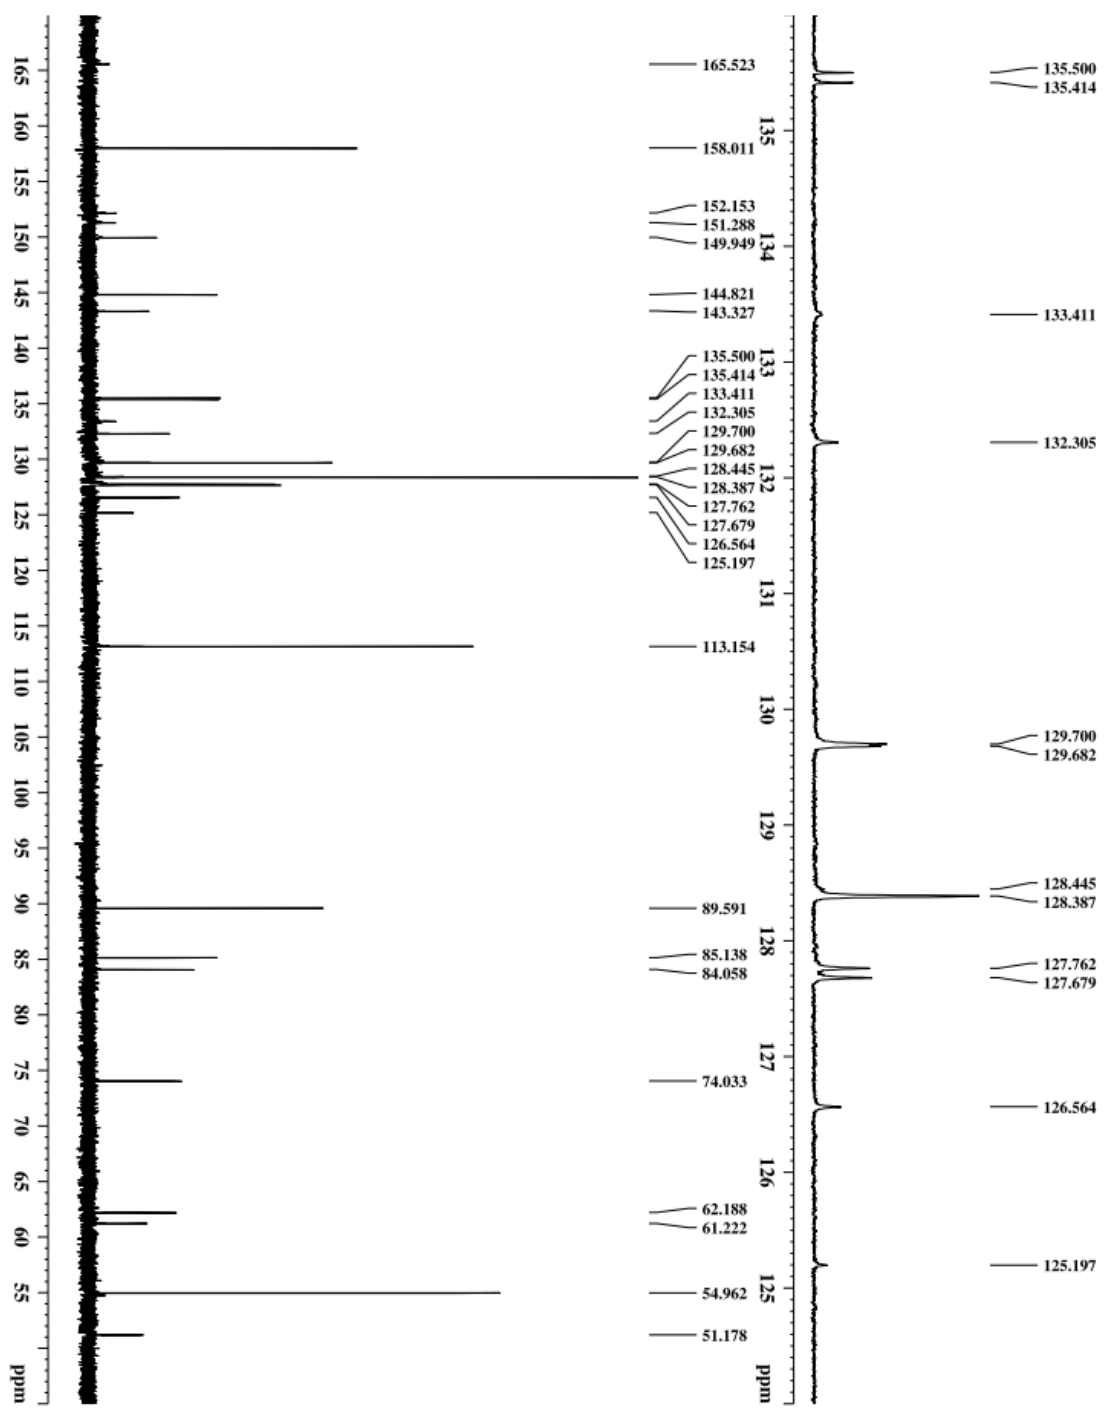

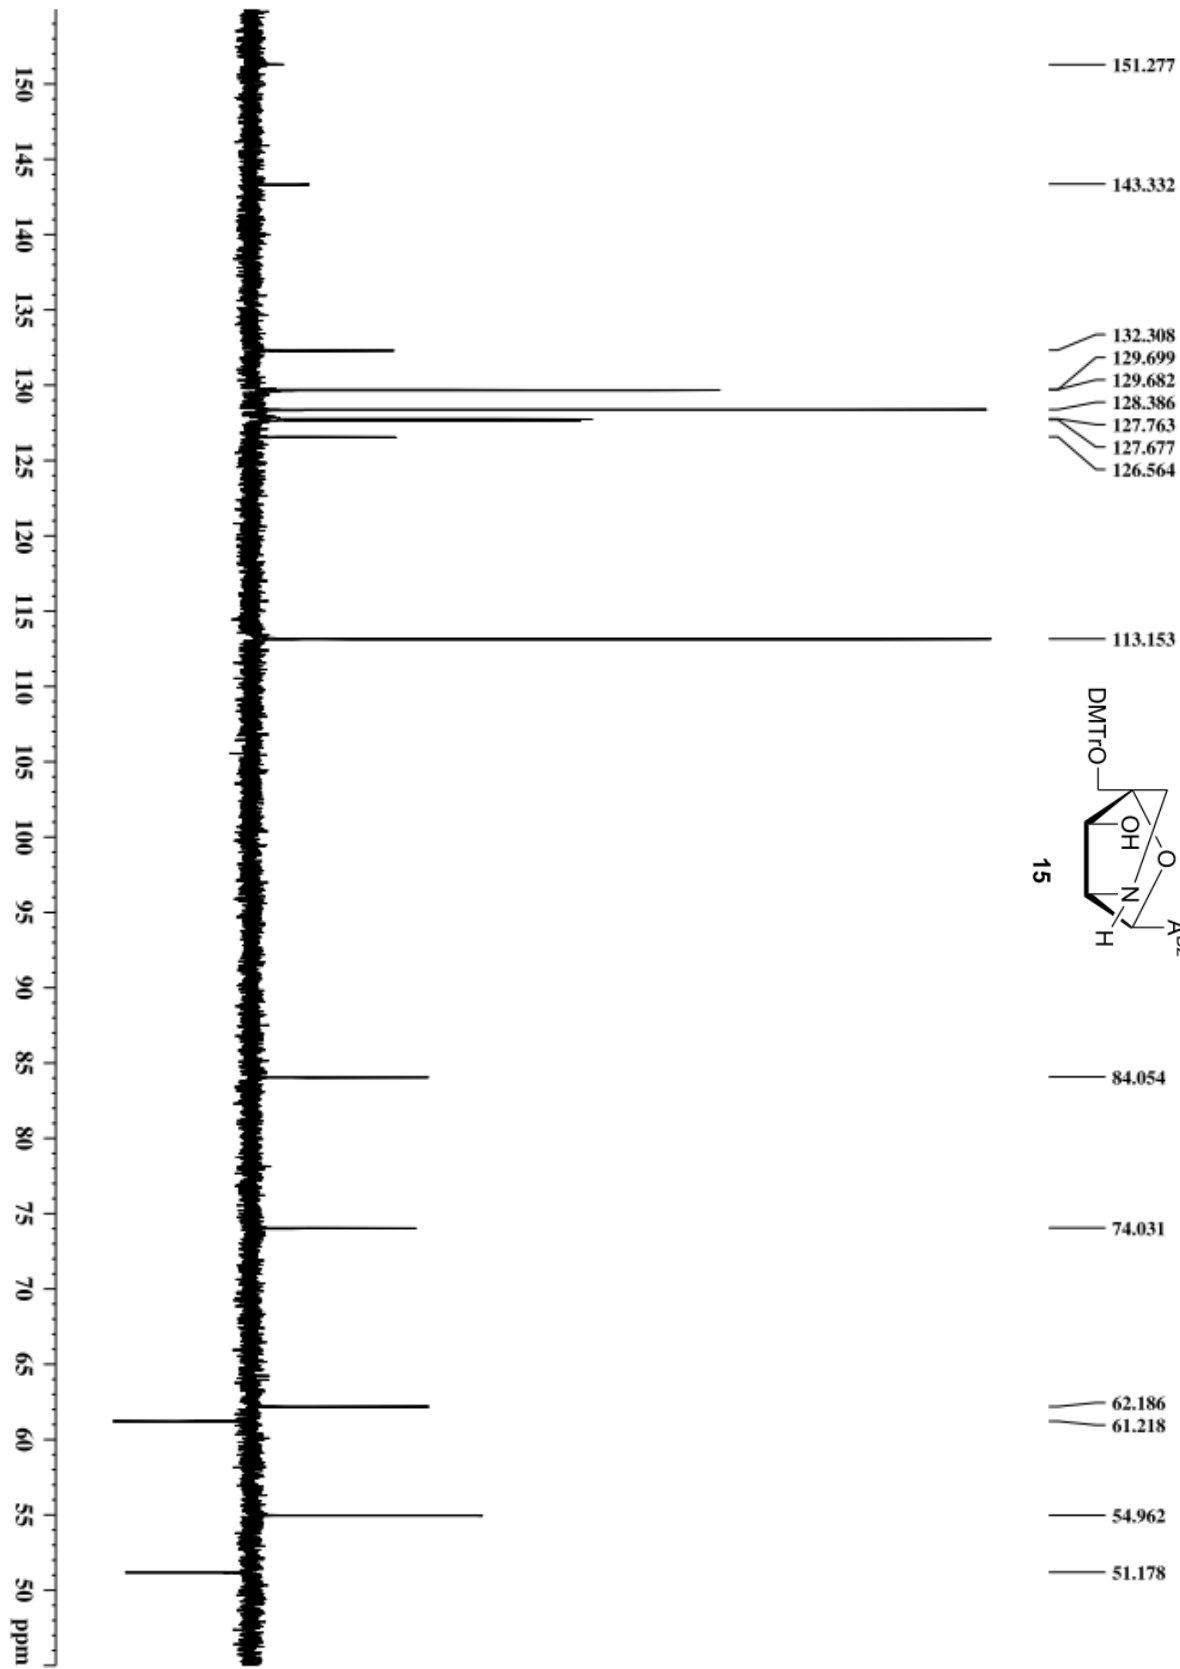

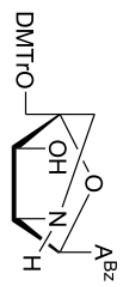

15

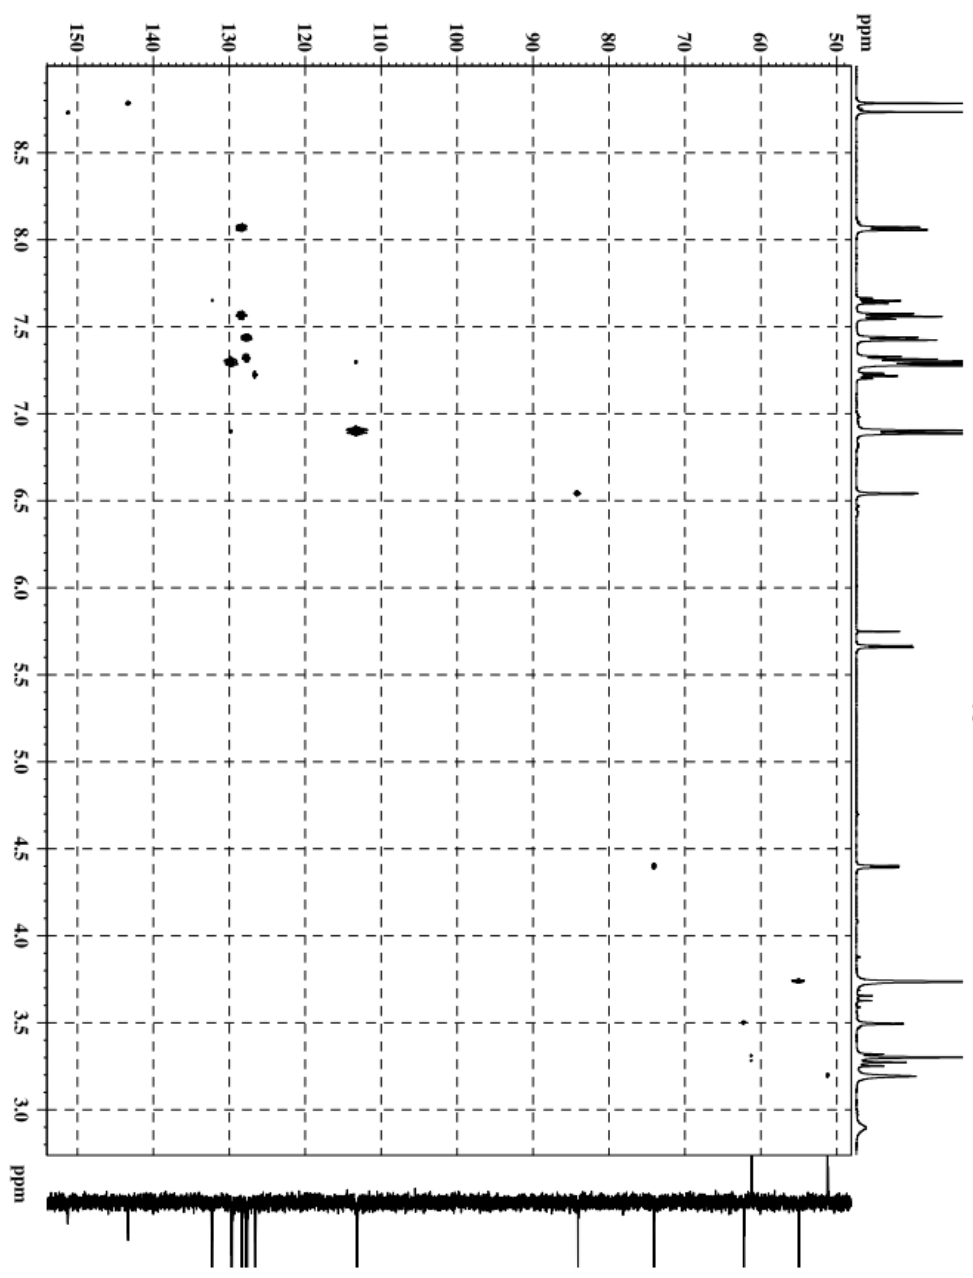



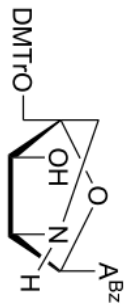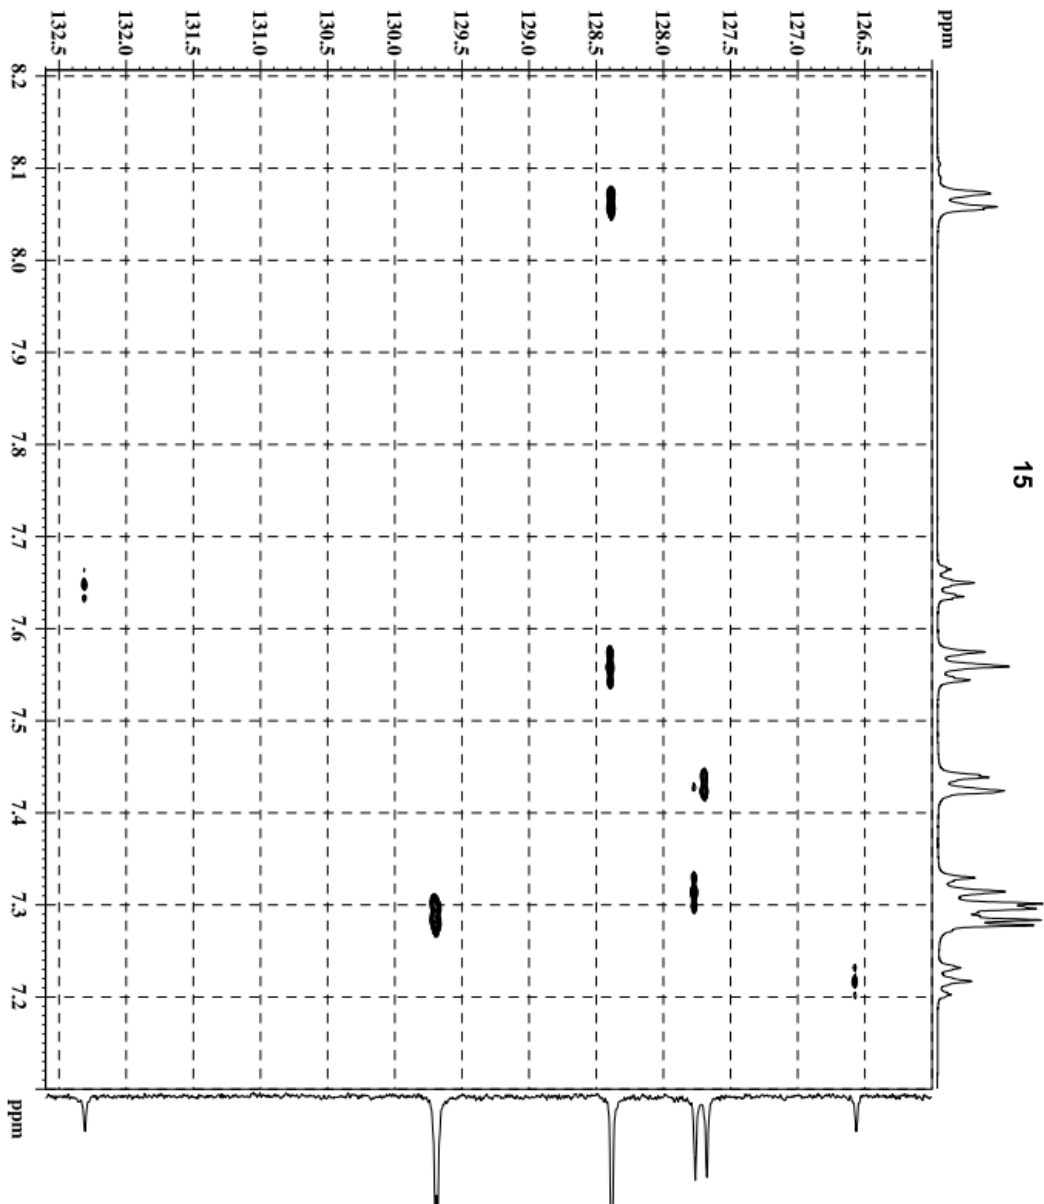

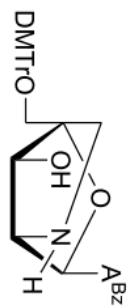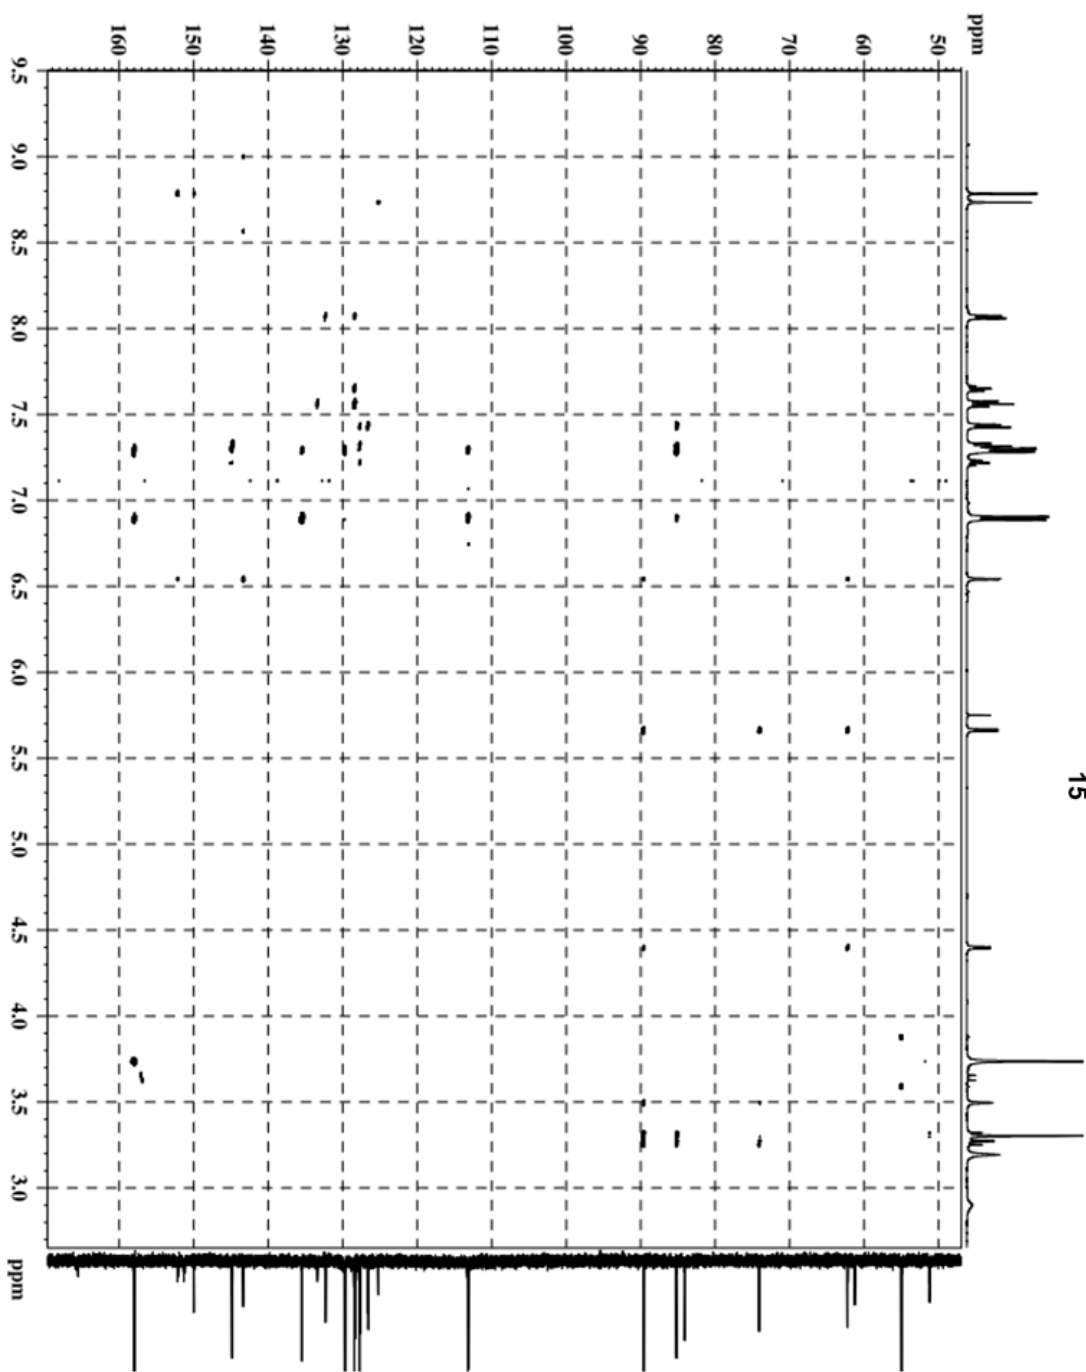

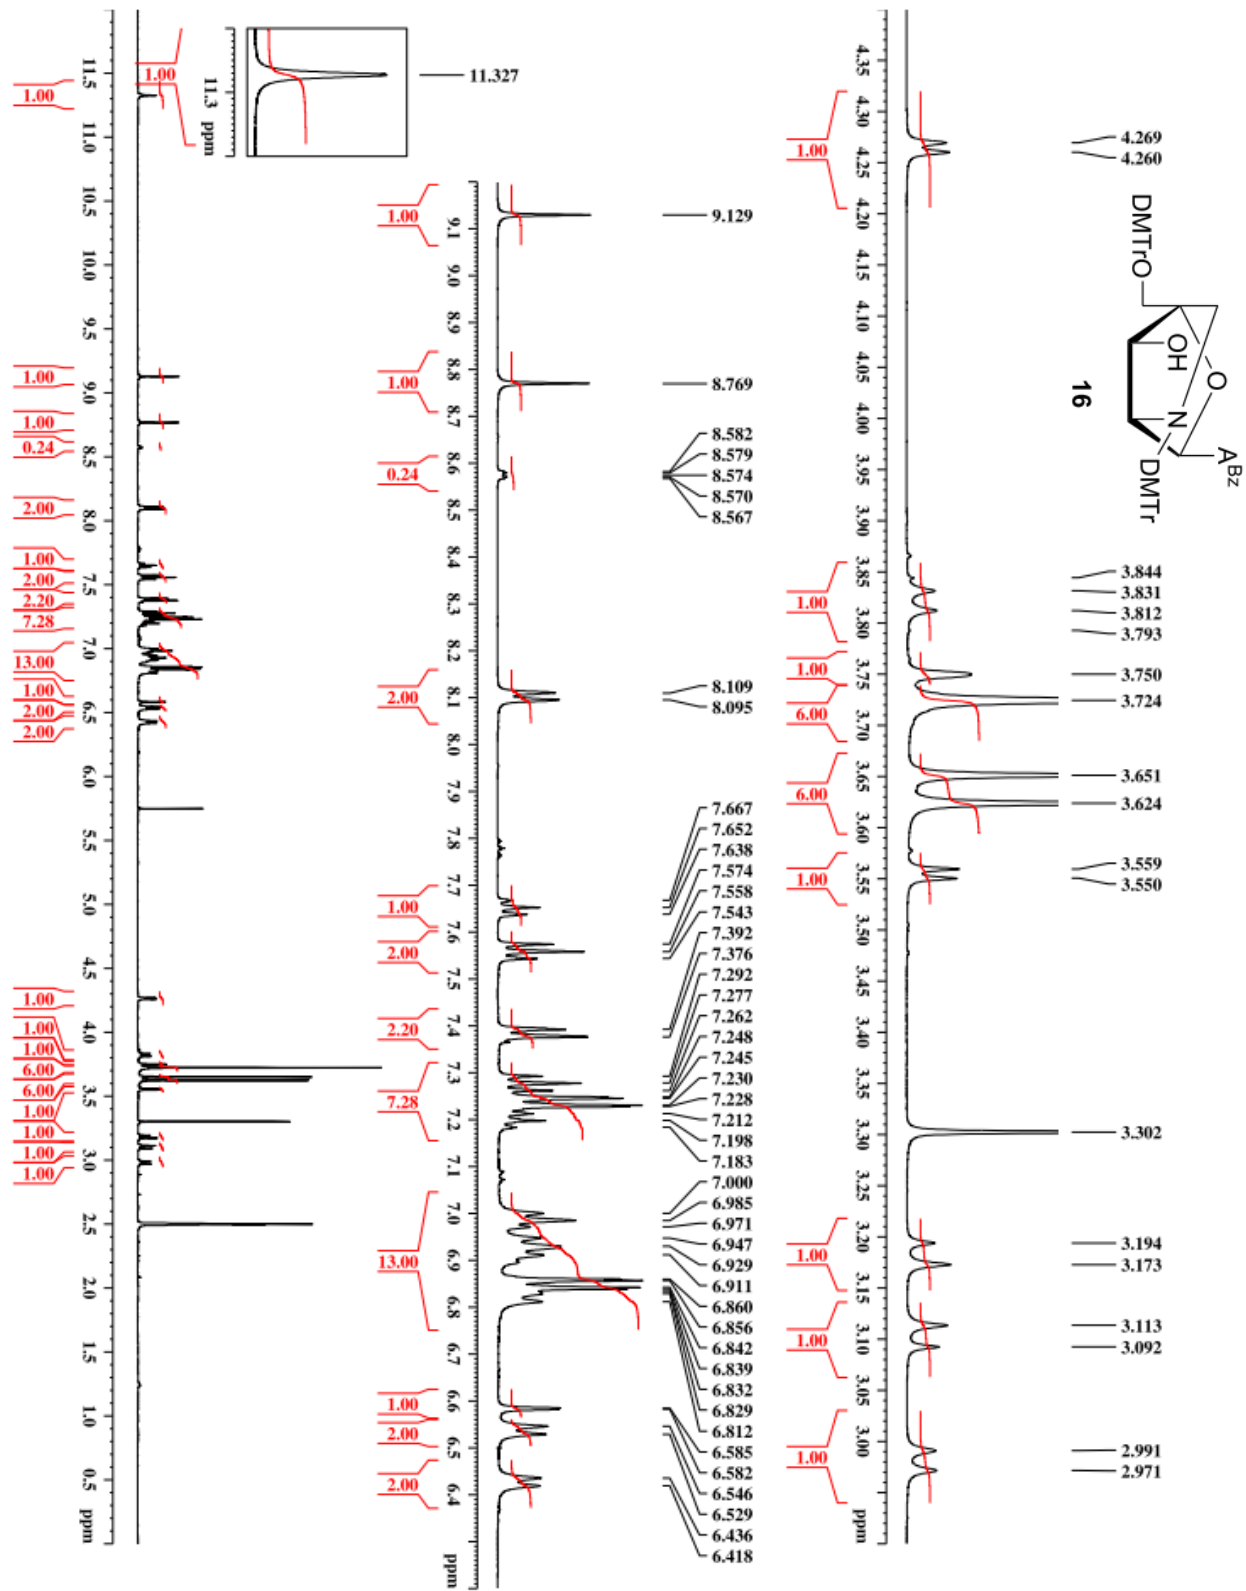

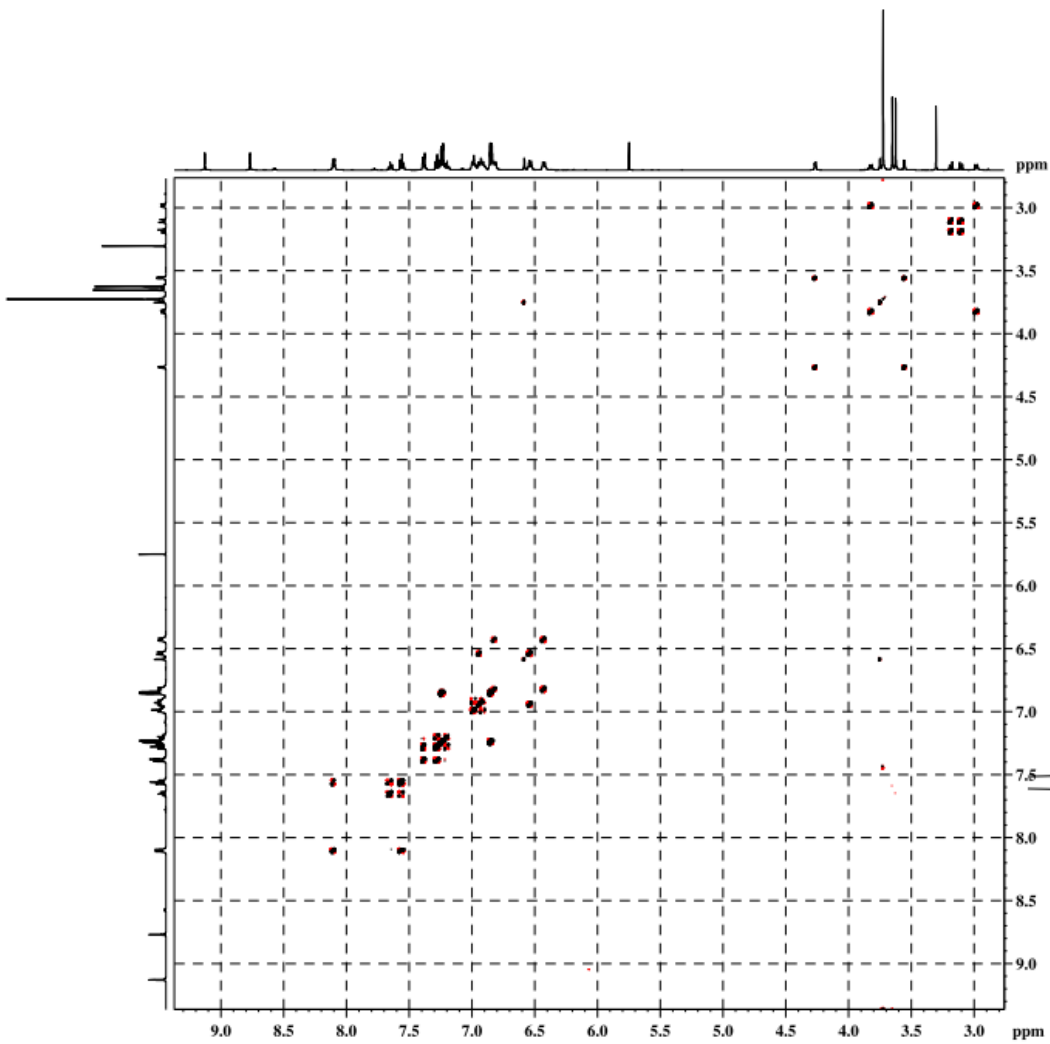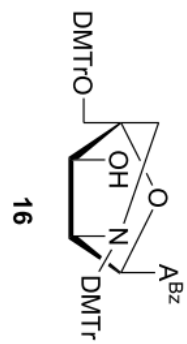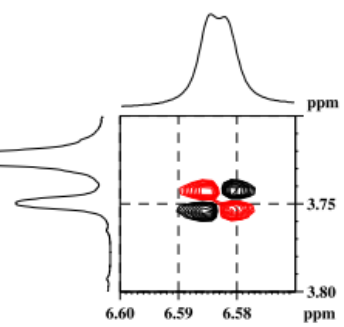

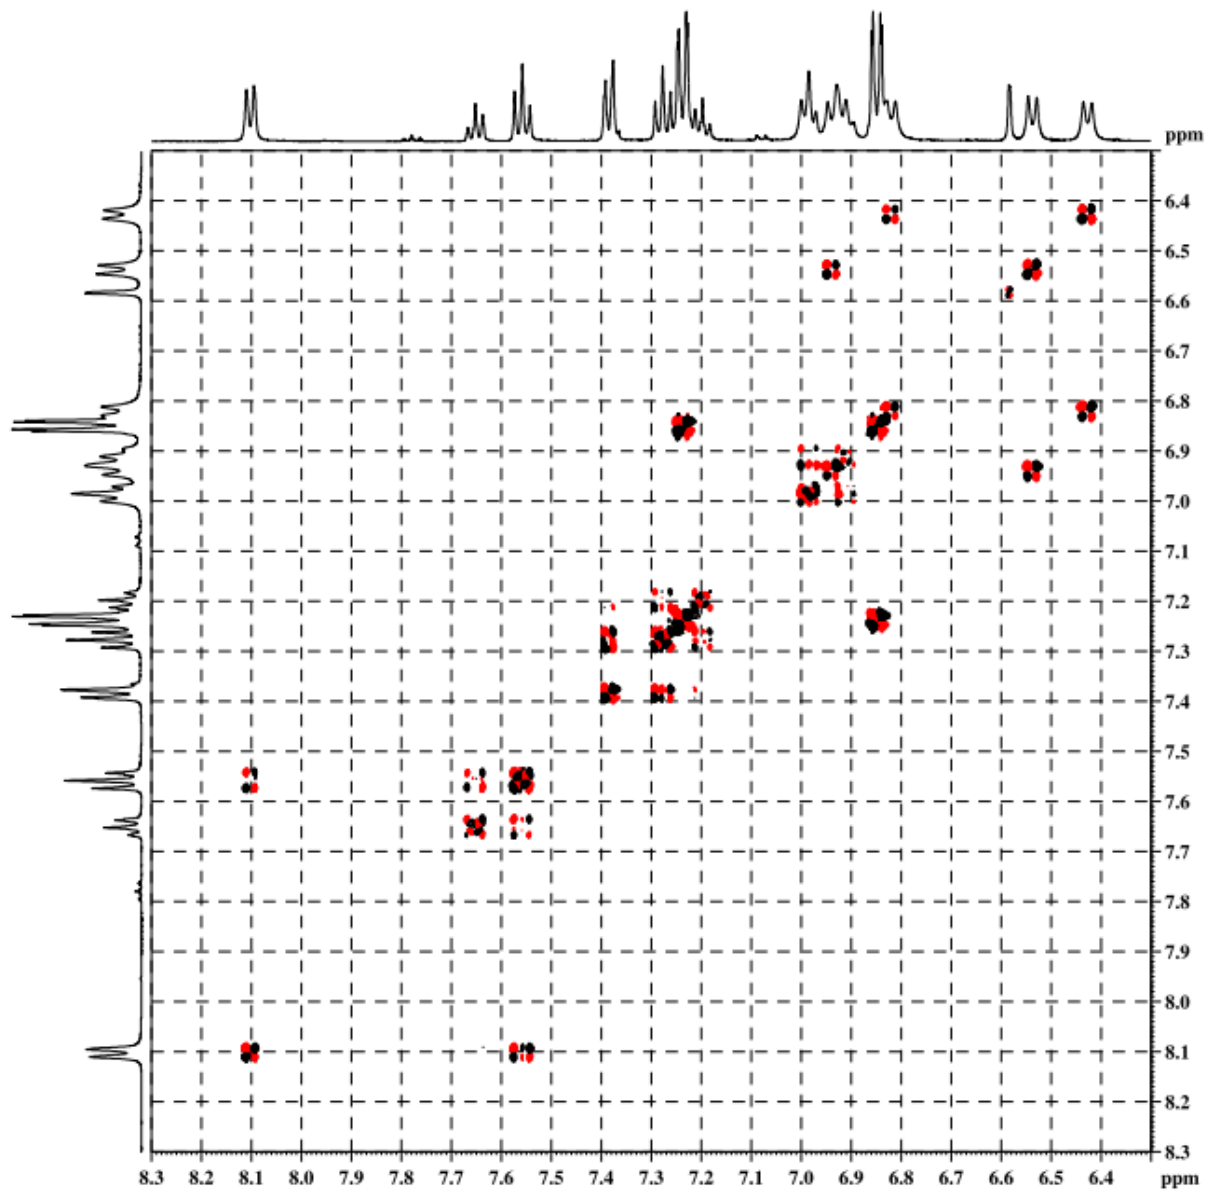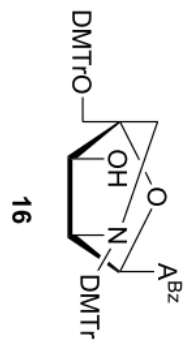

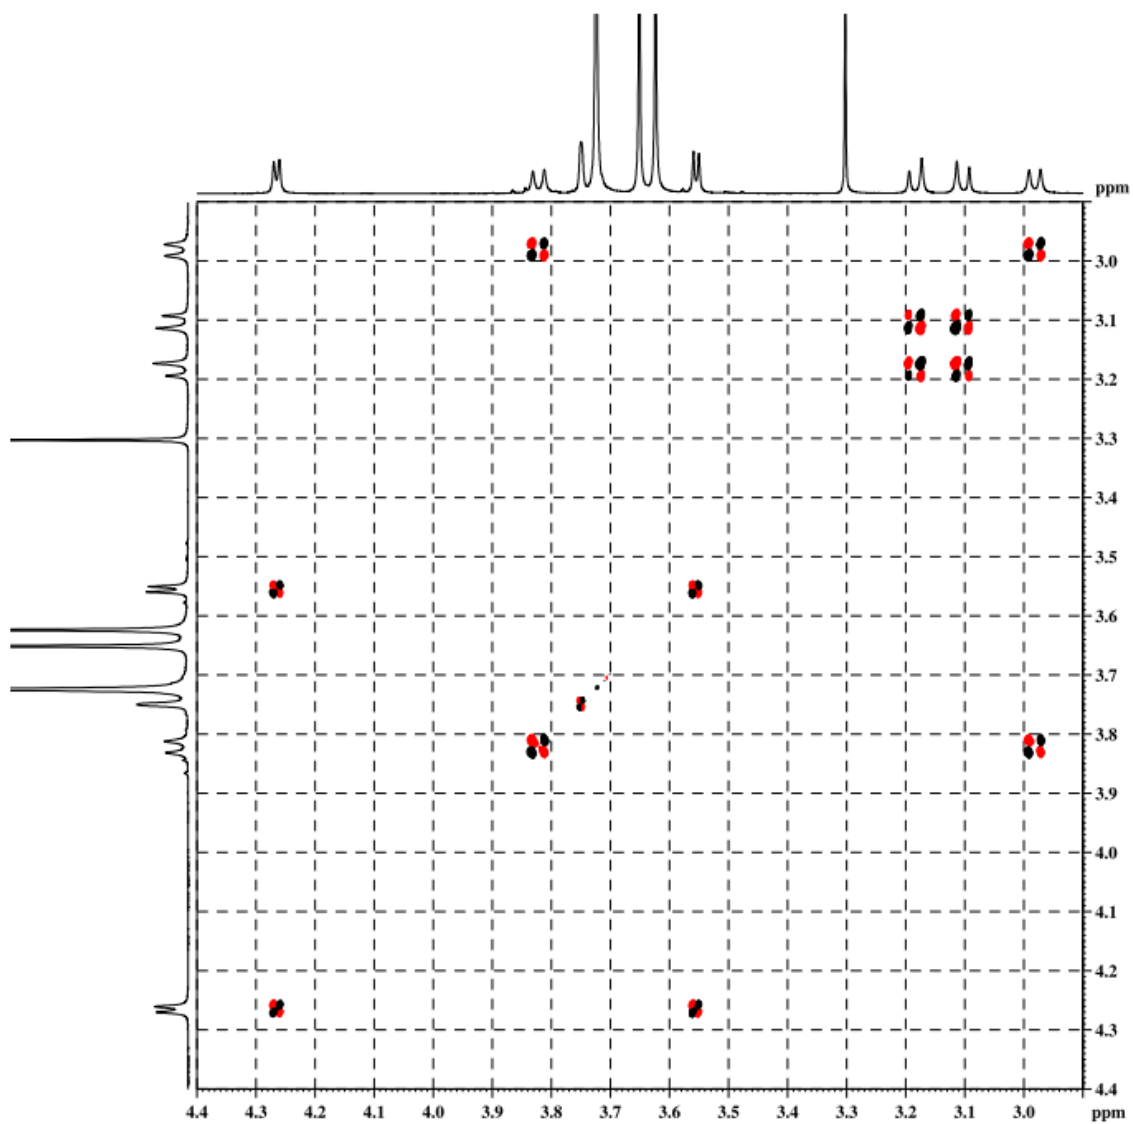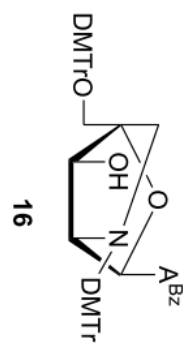

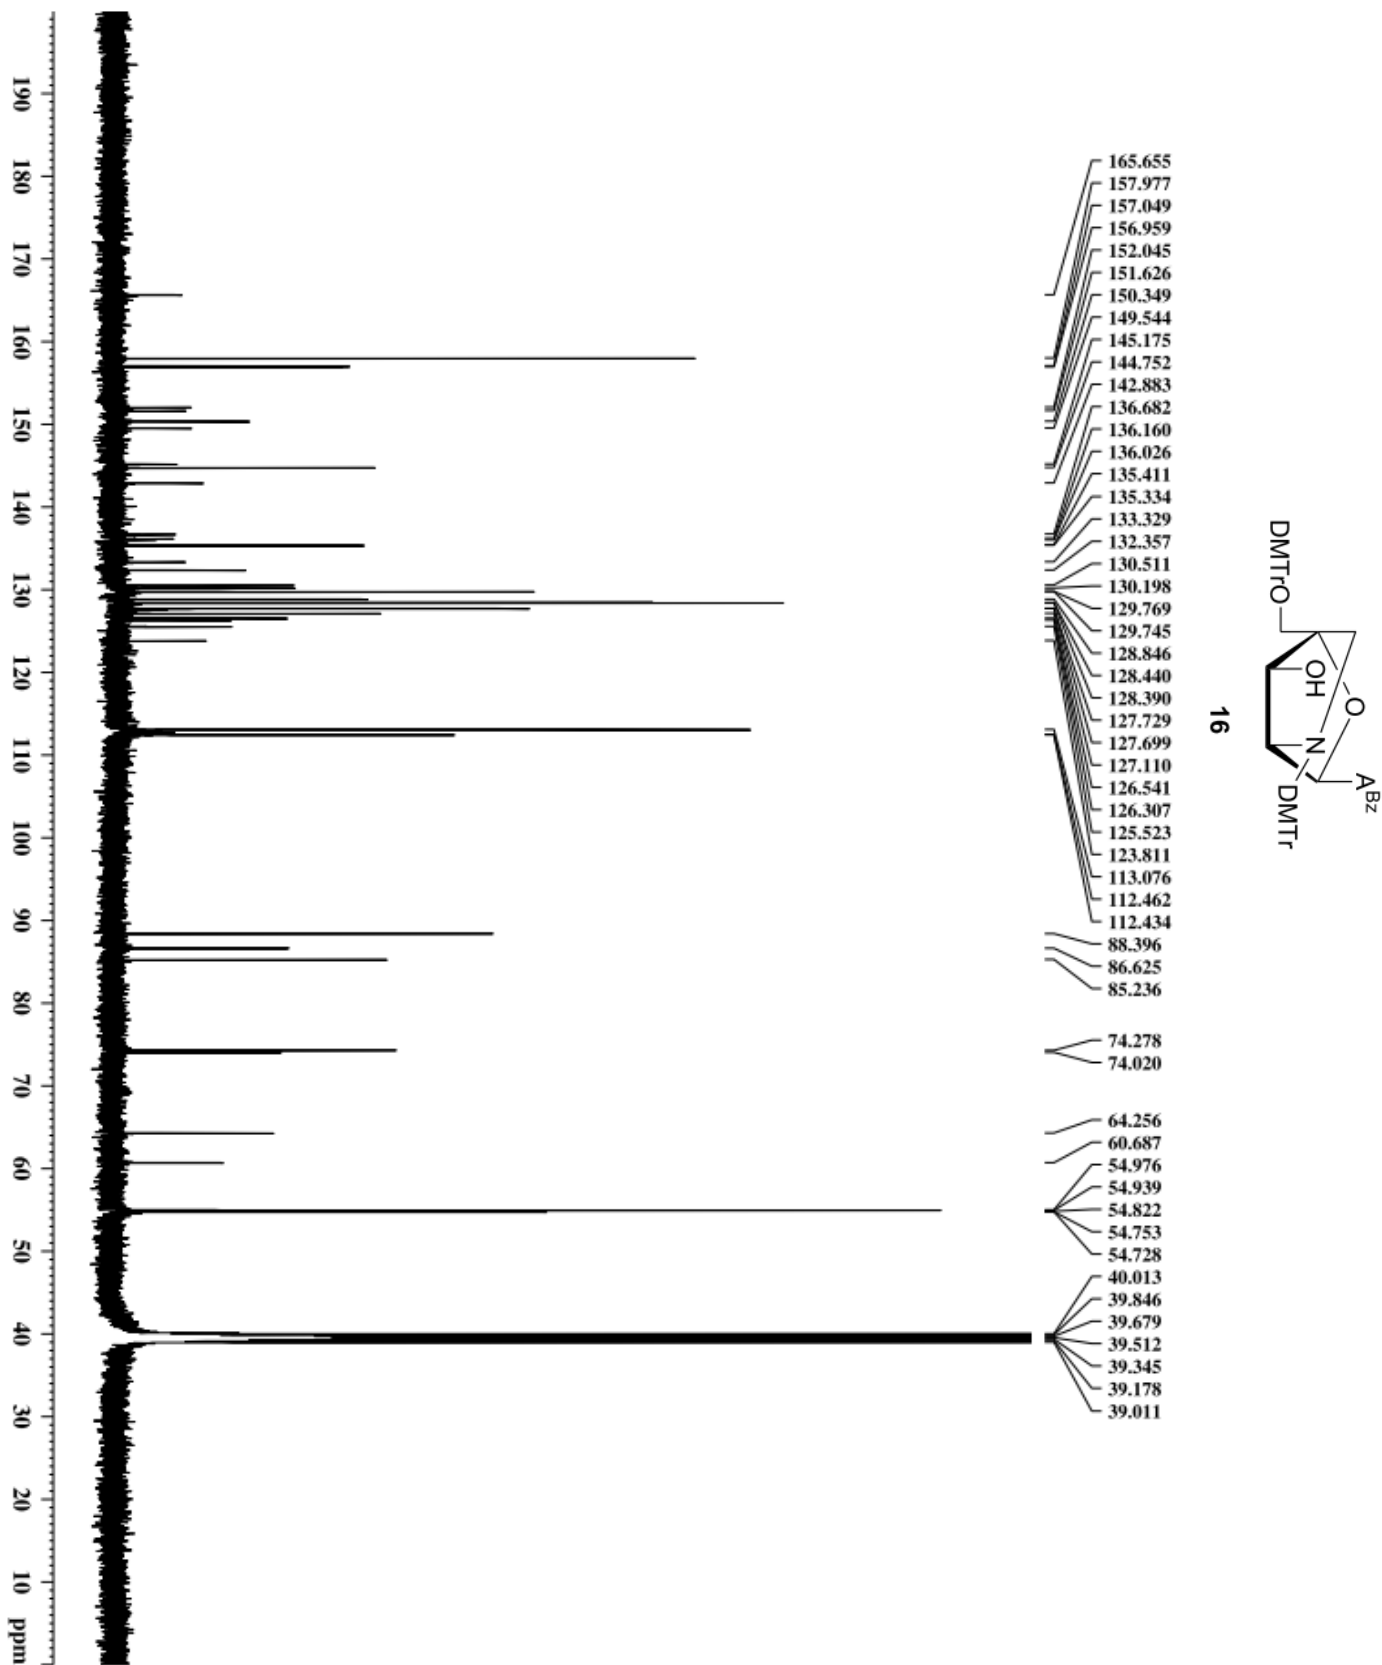

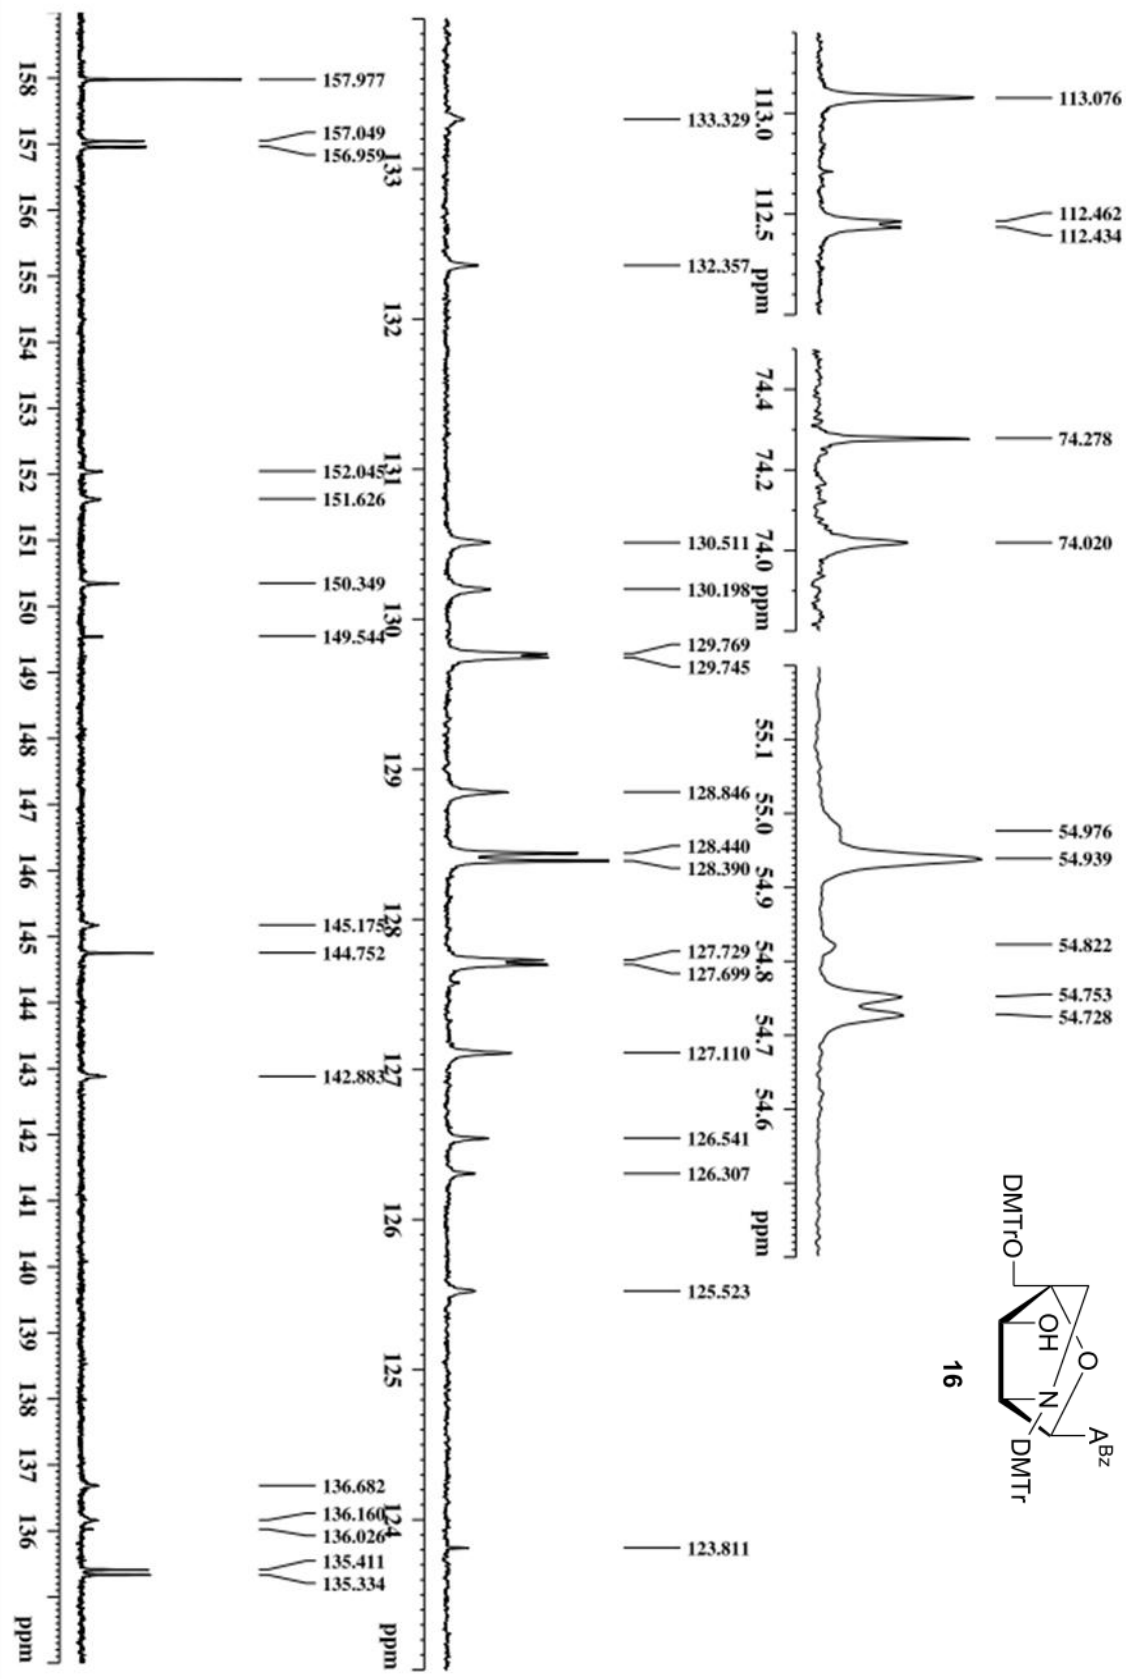



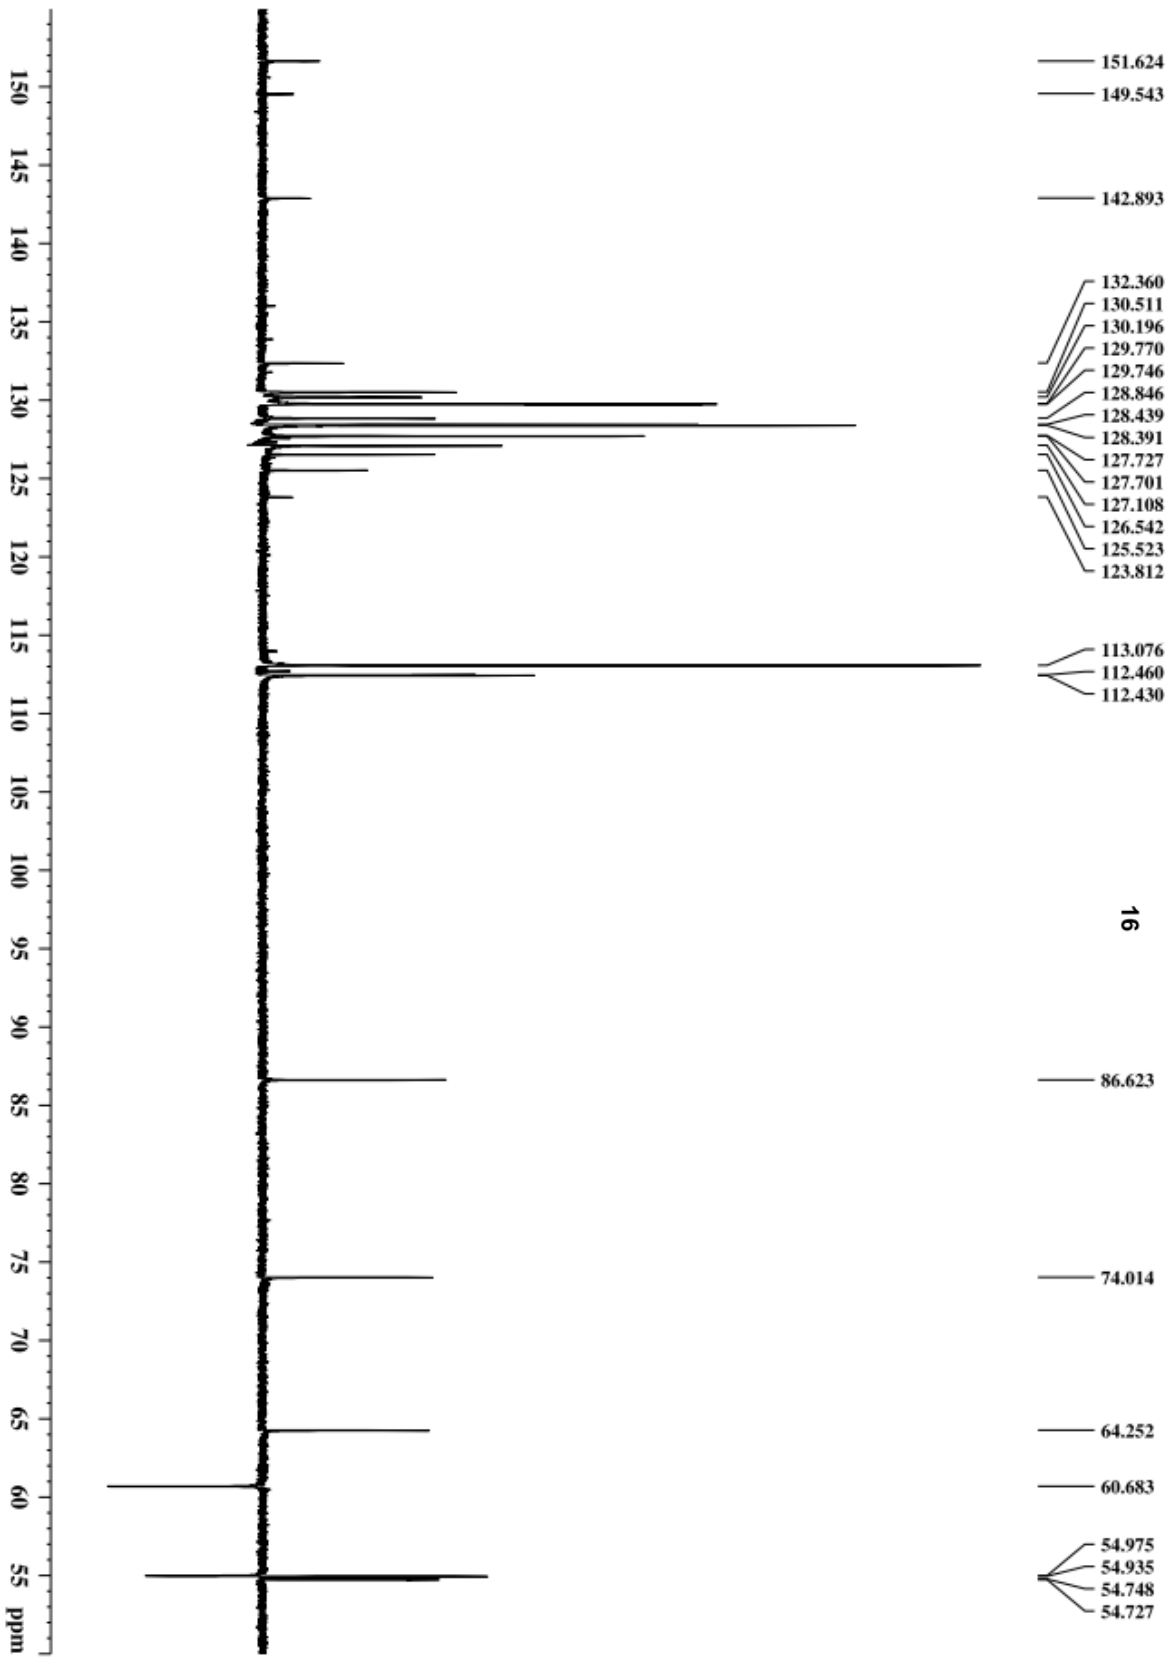

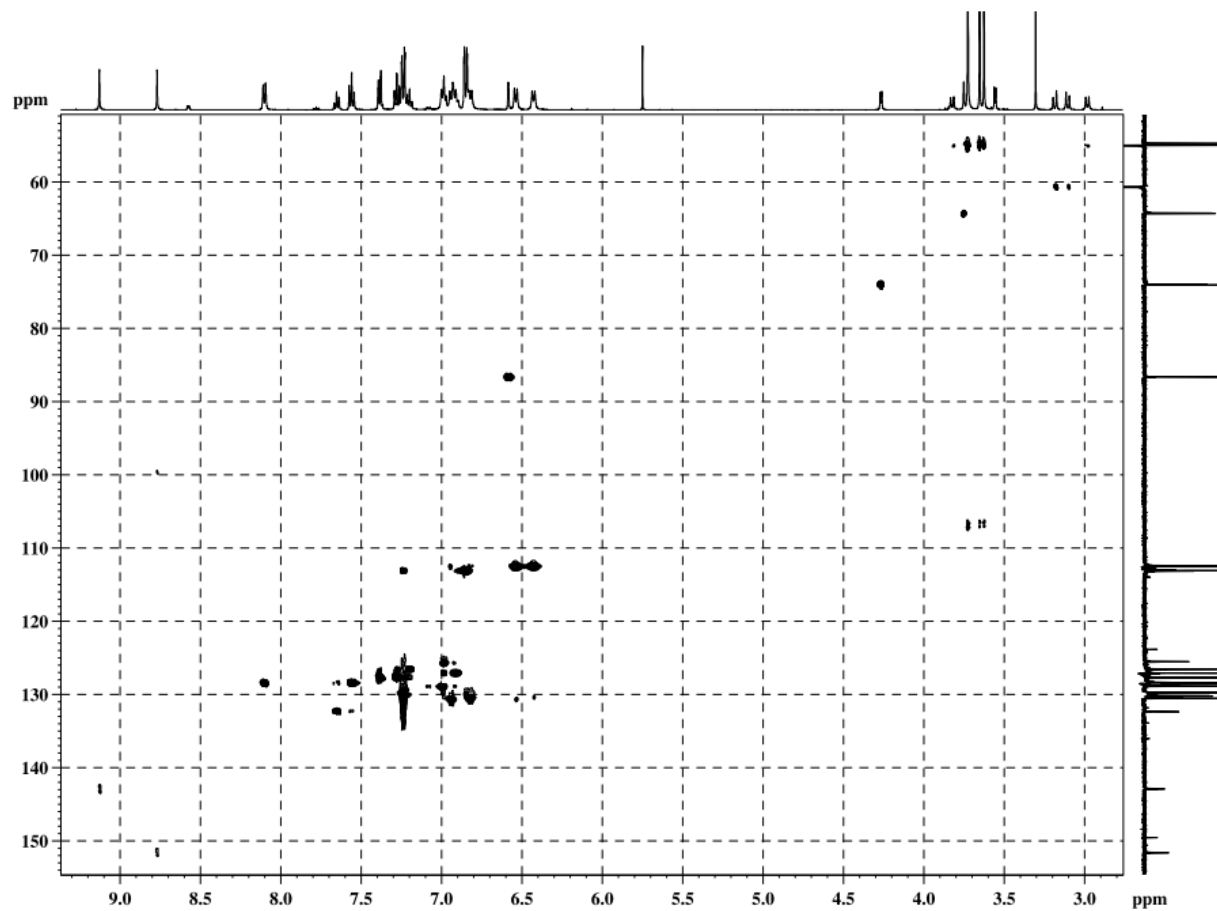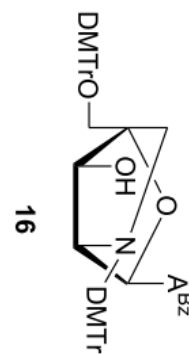

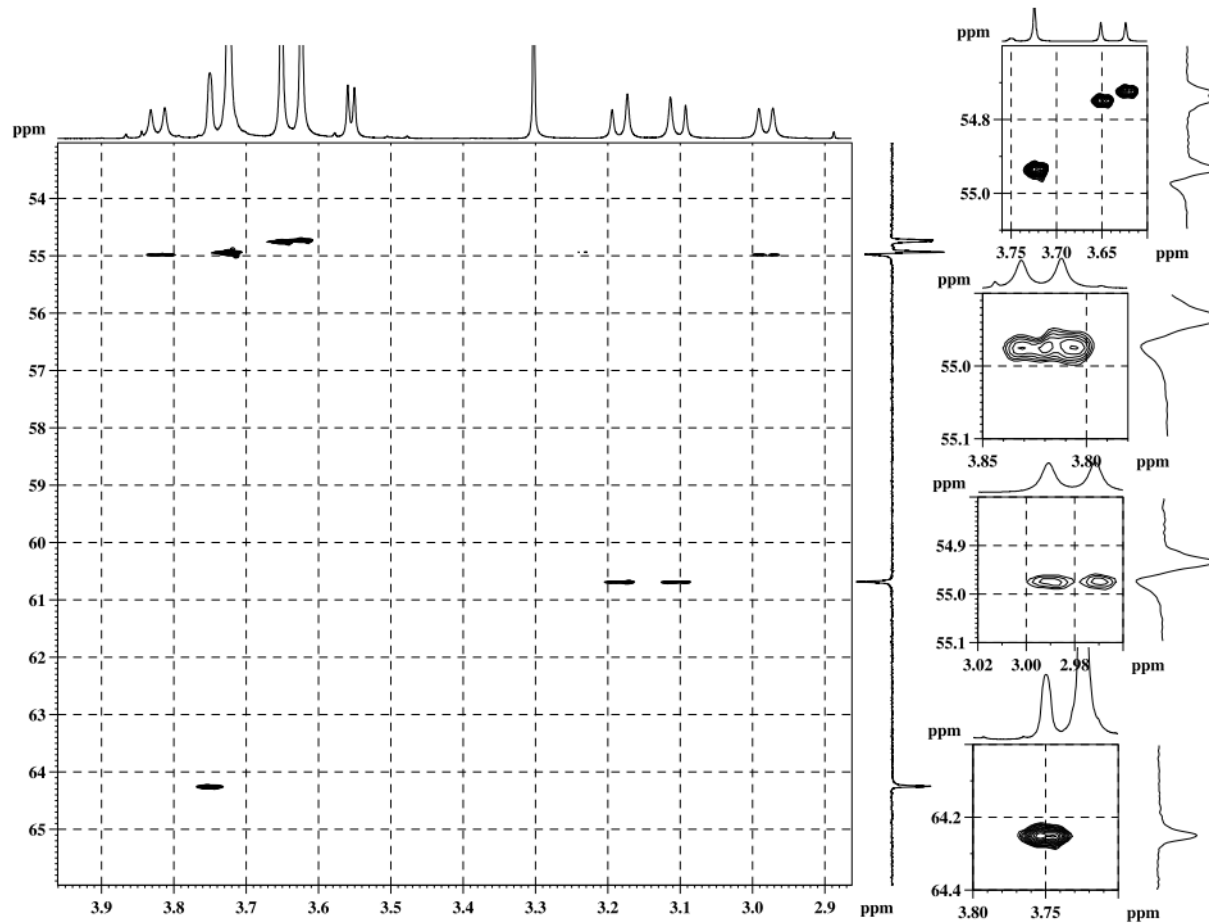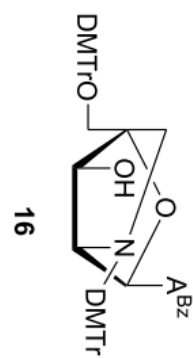

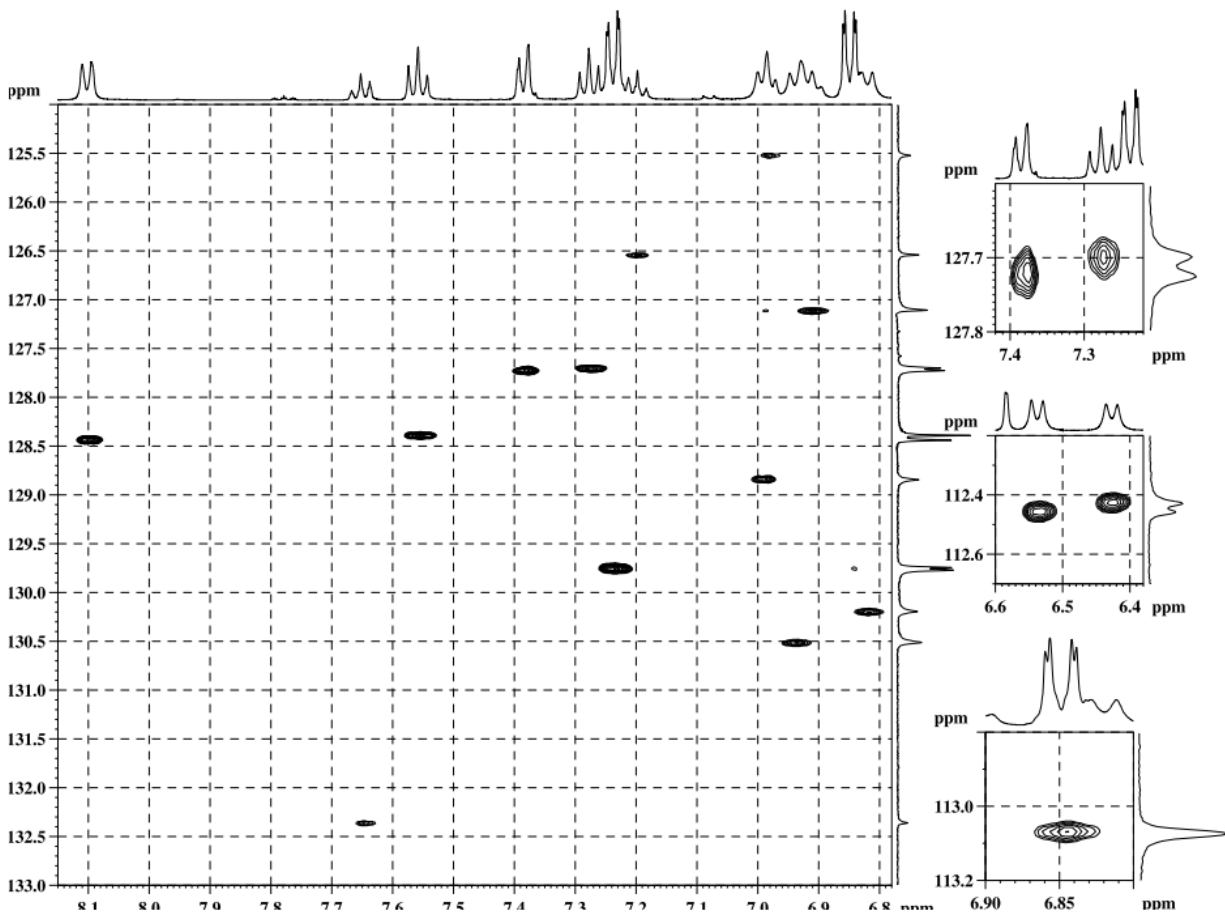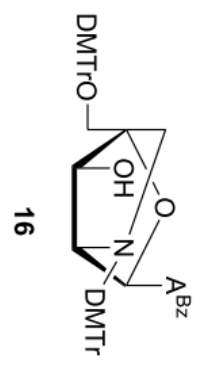



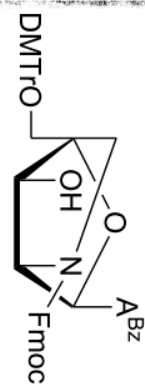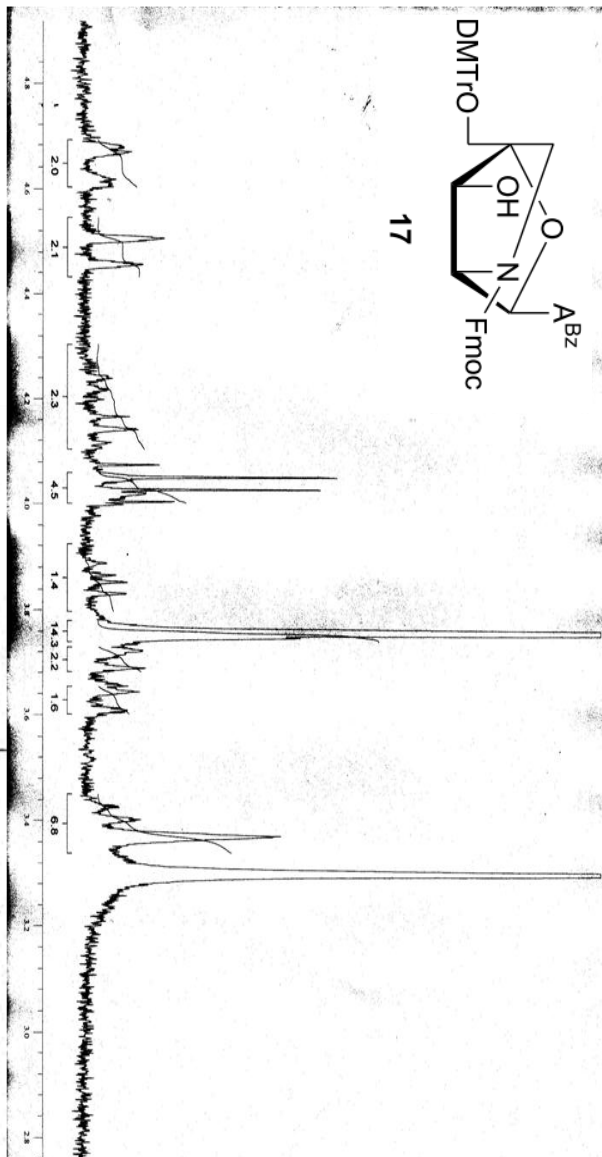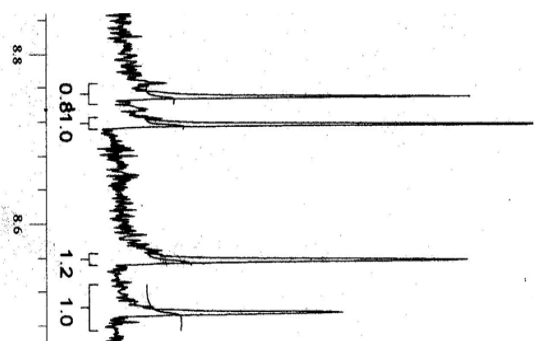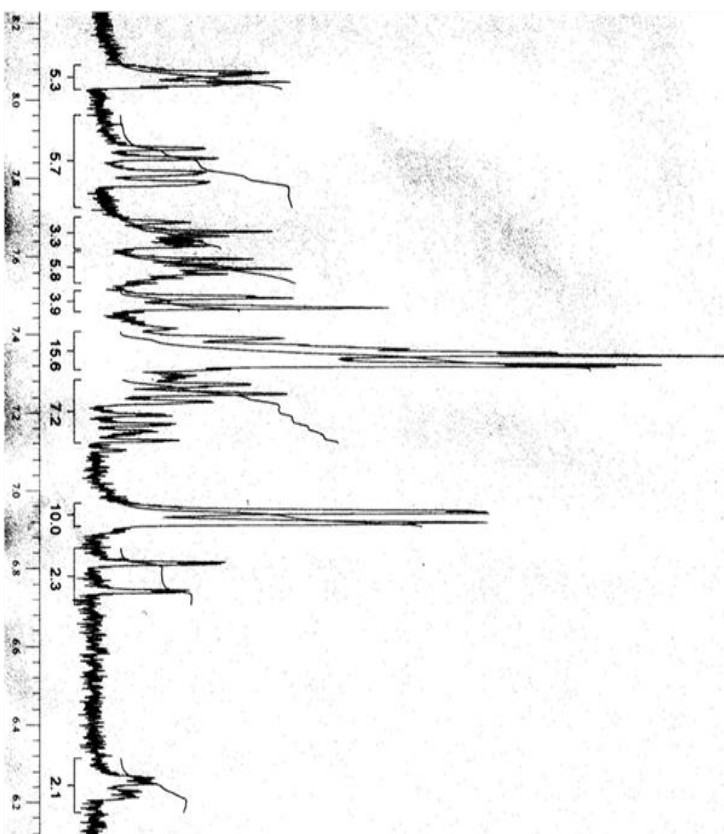

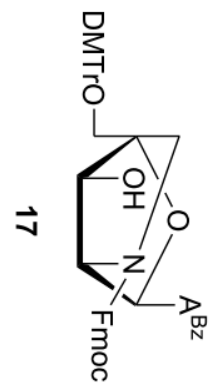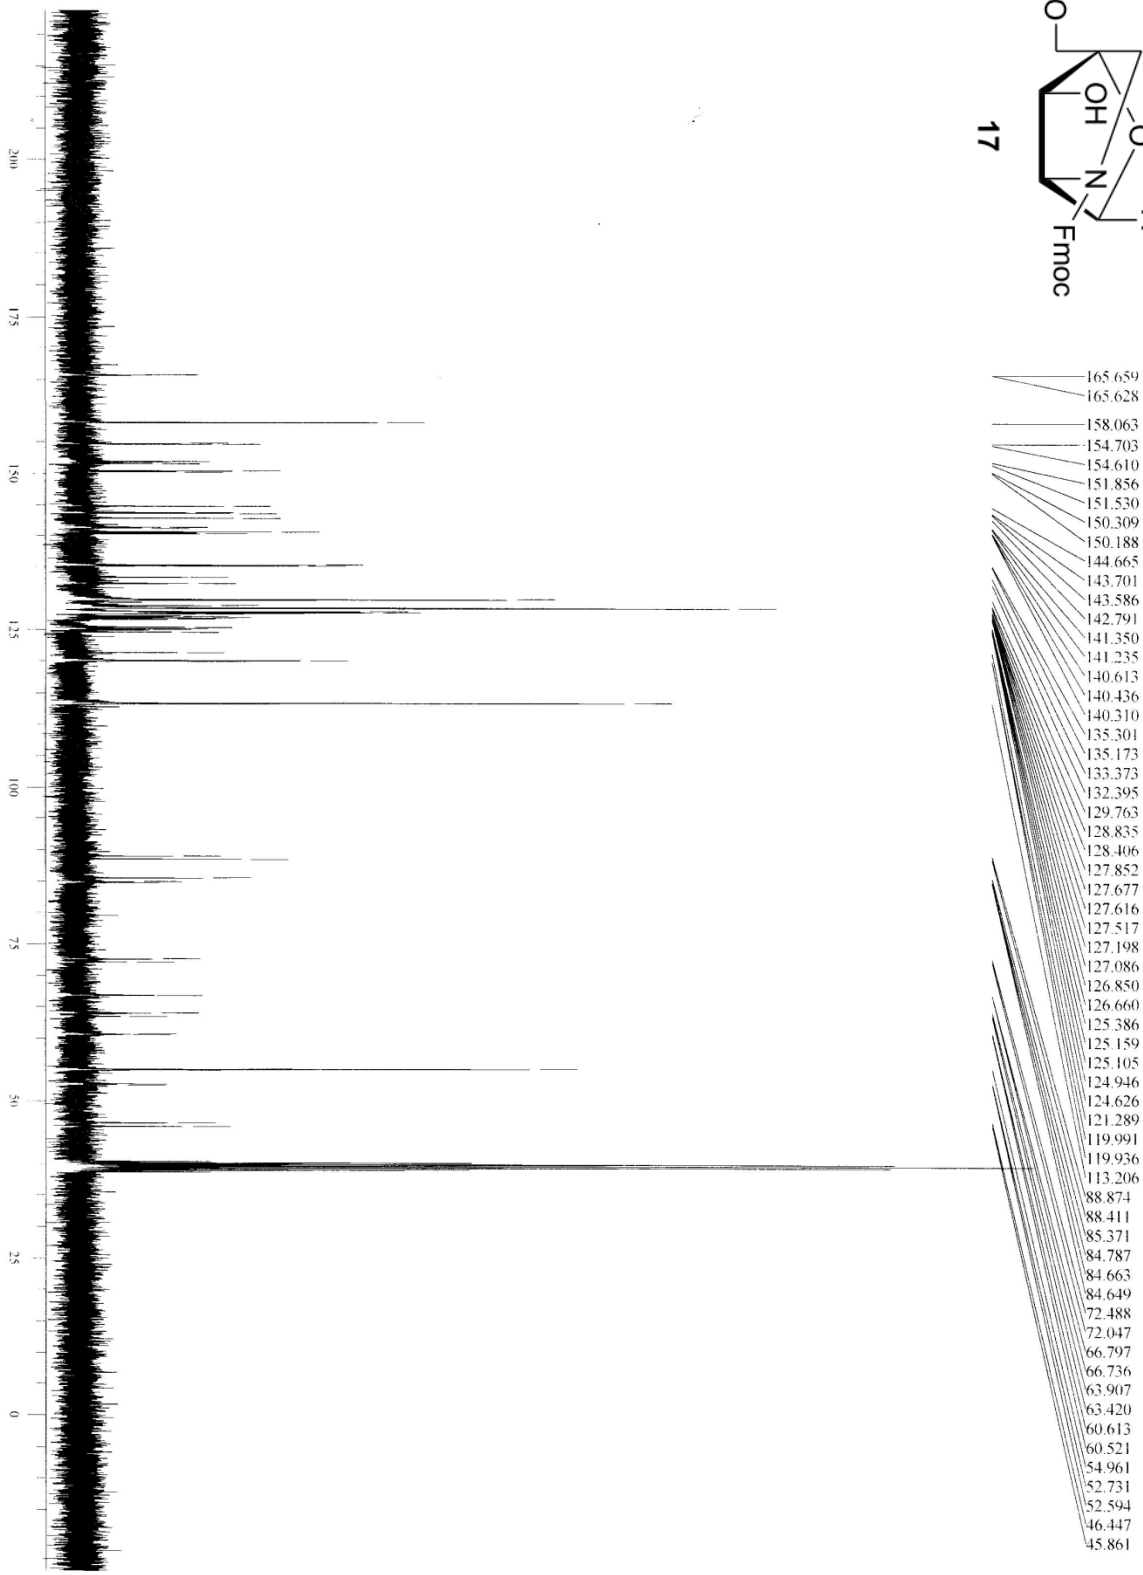

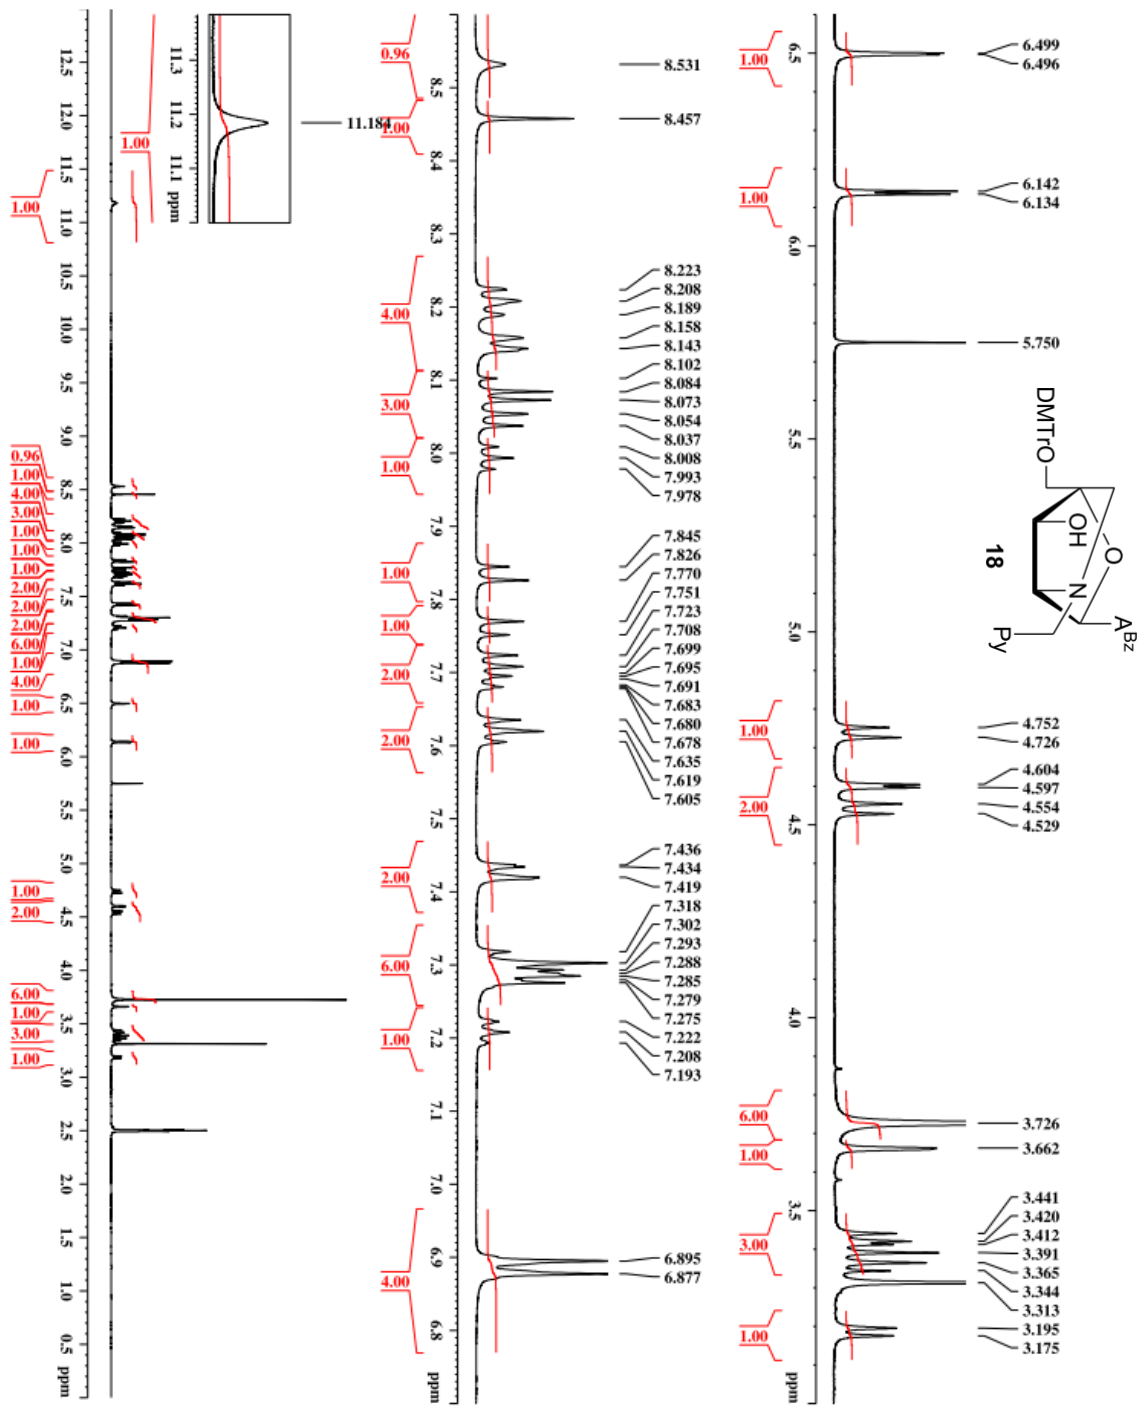



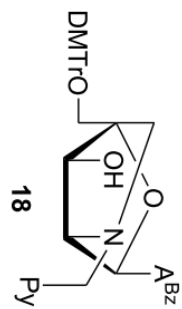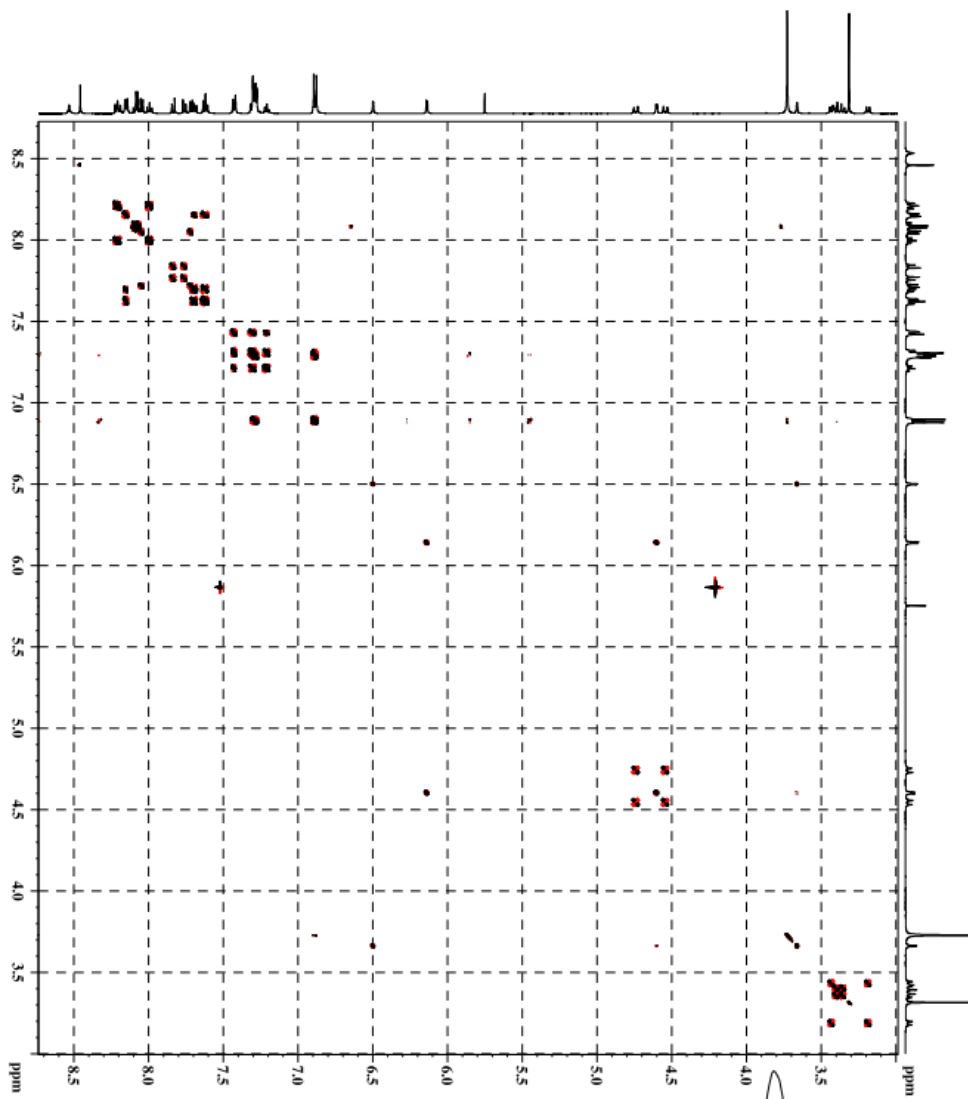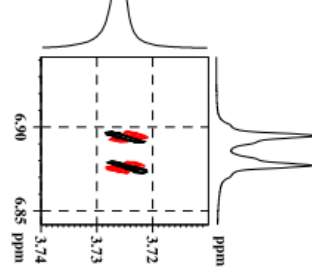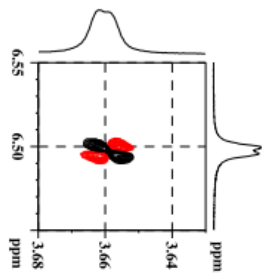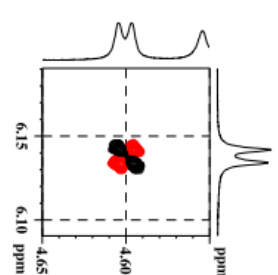

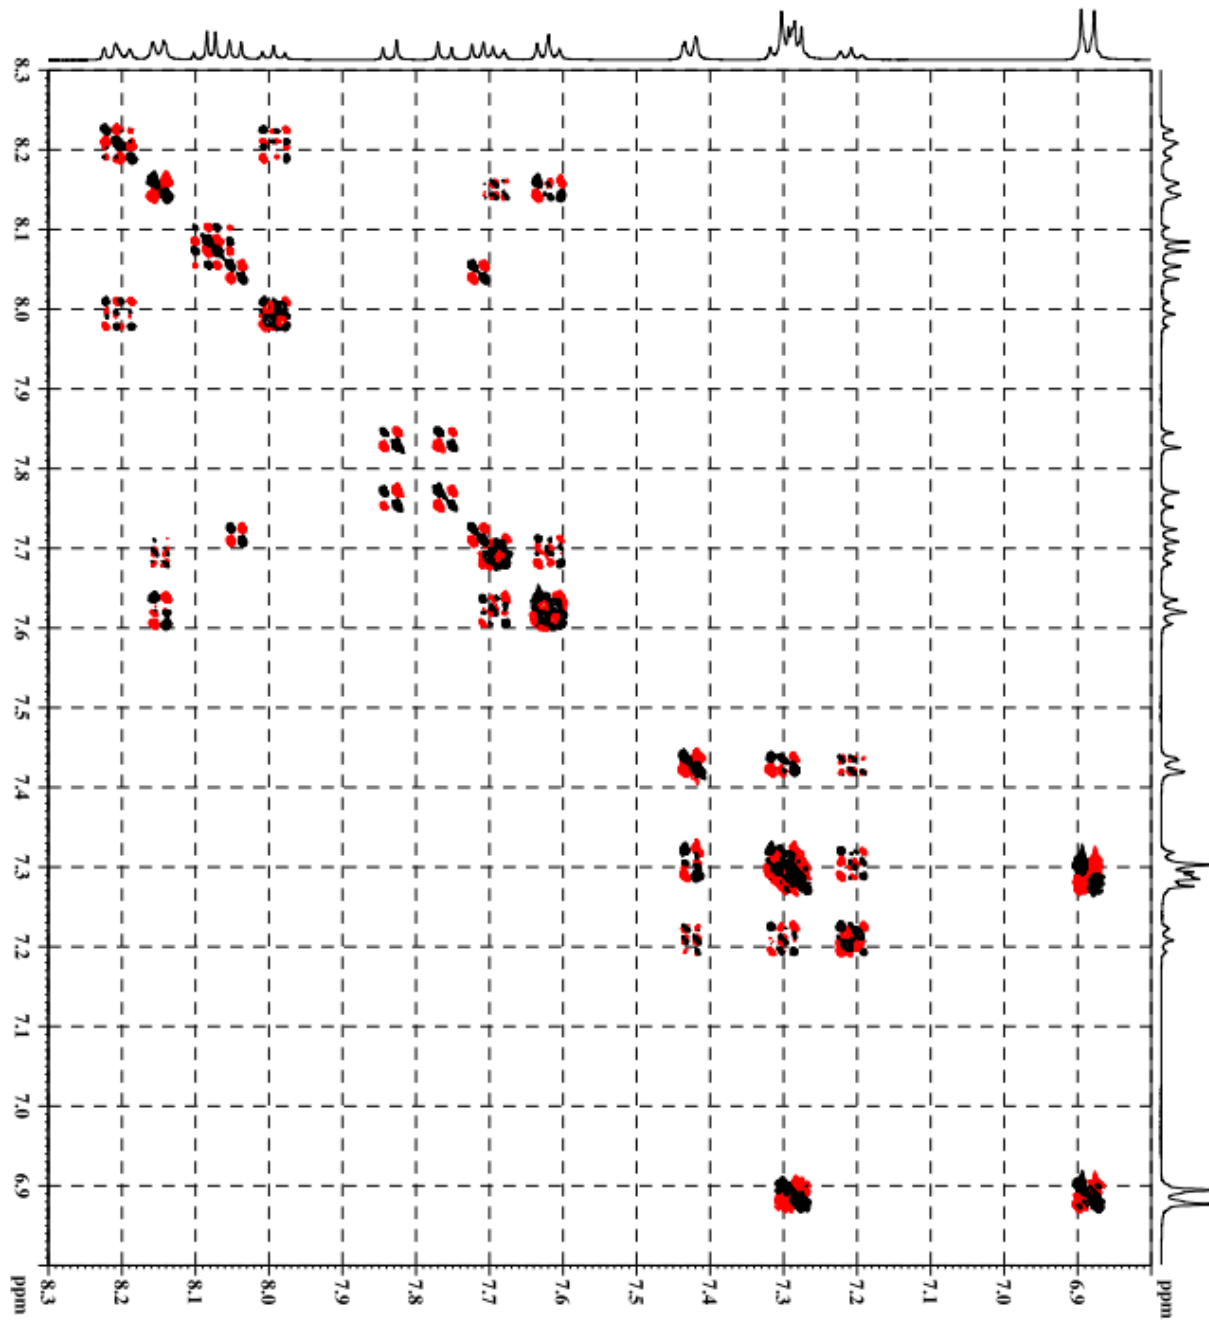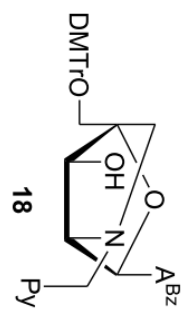

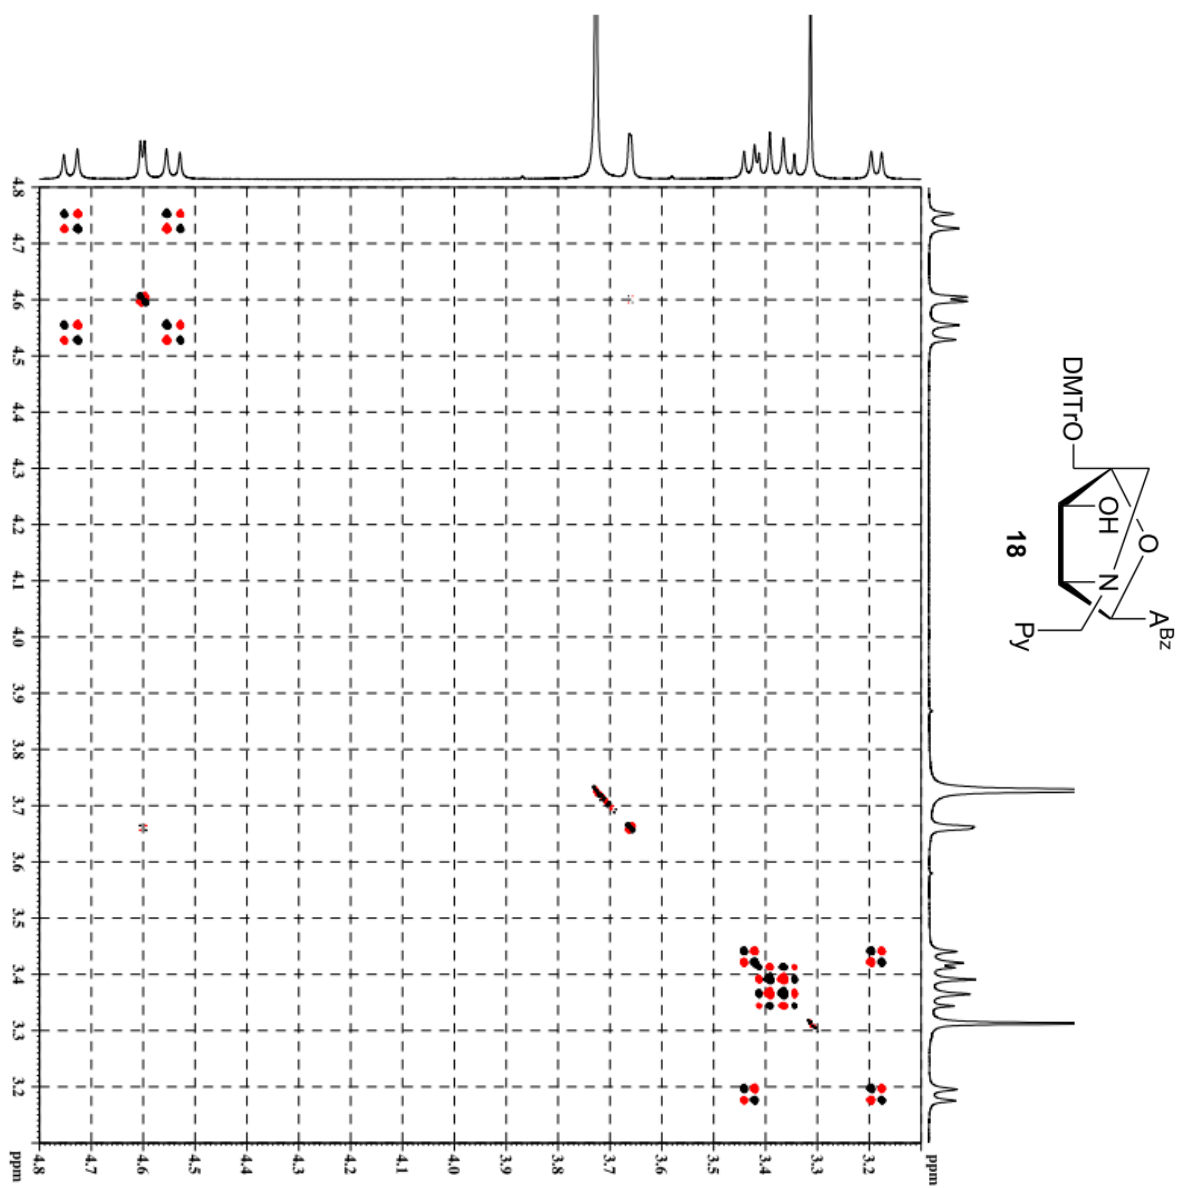

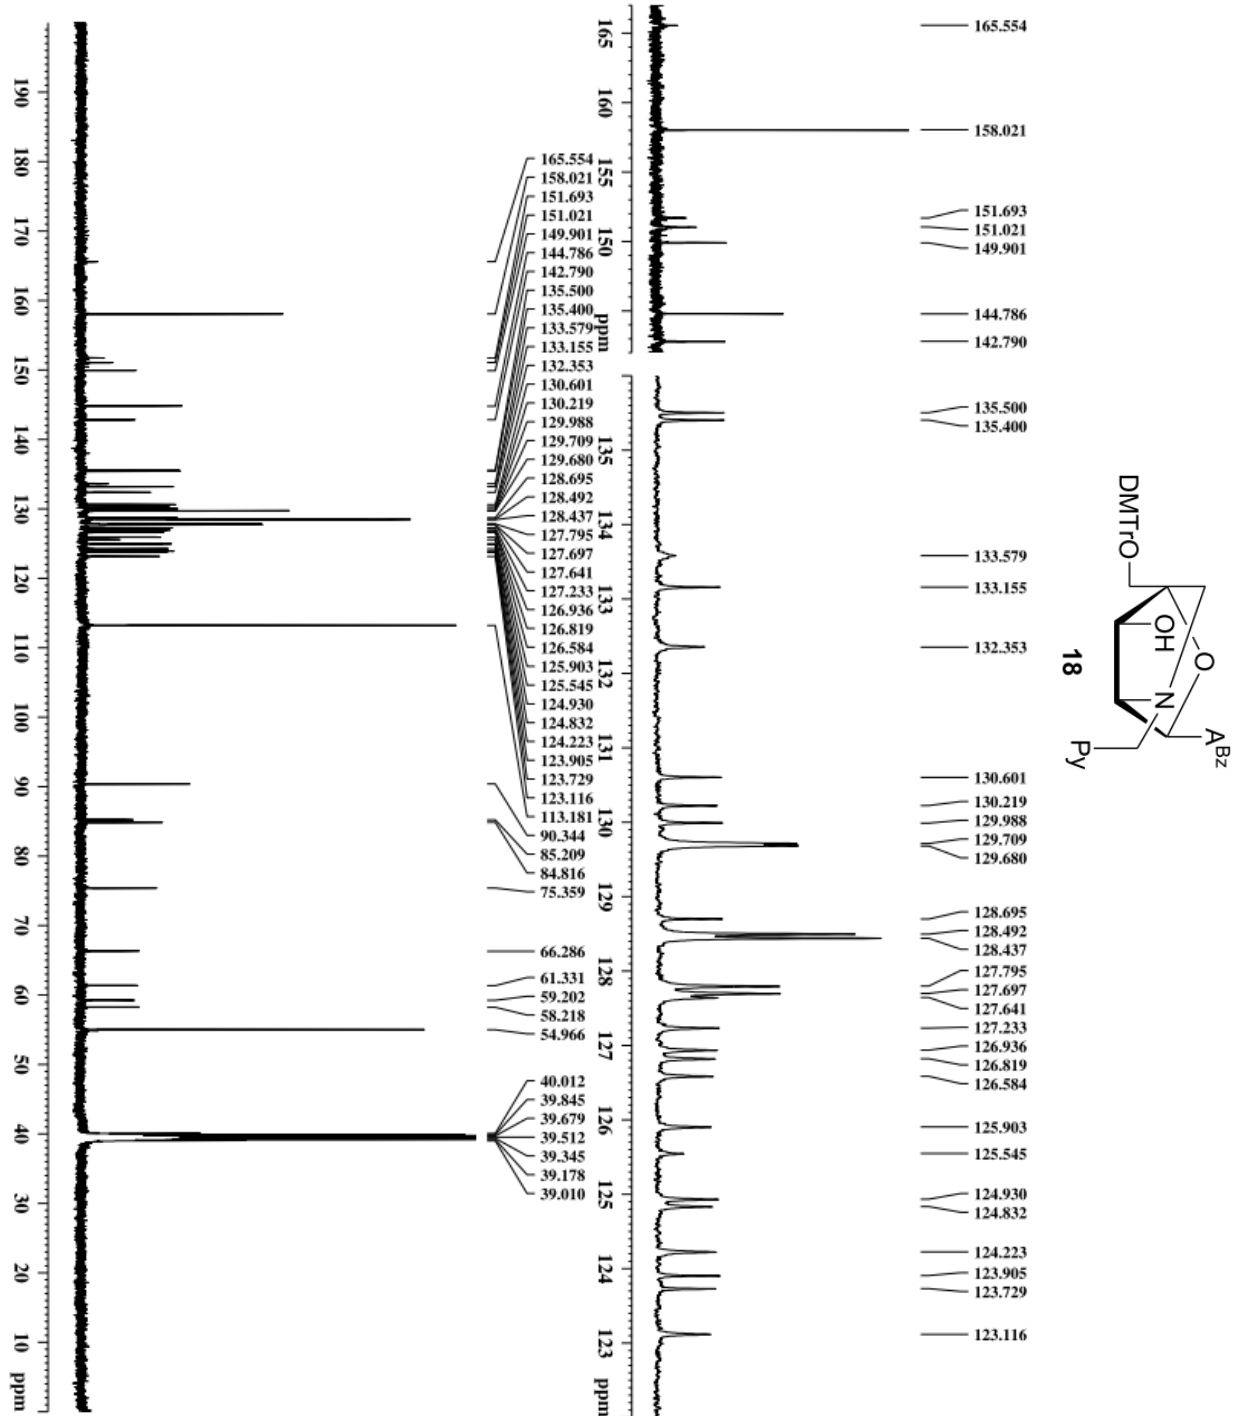

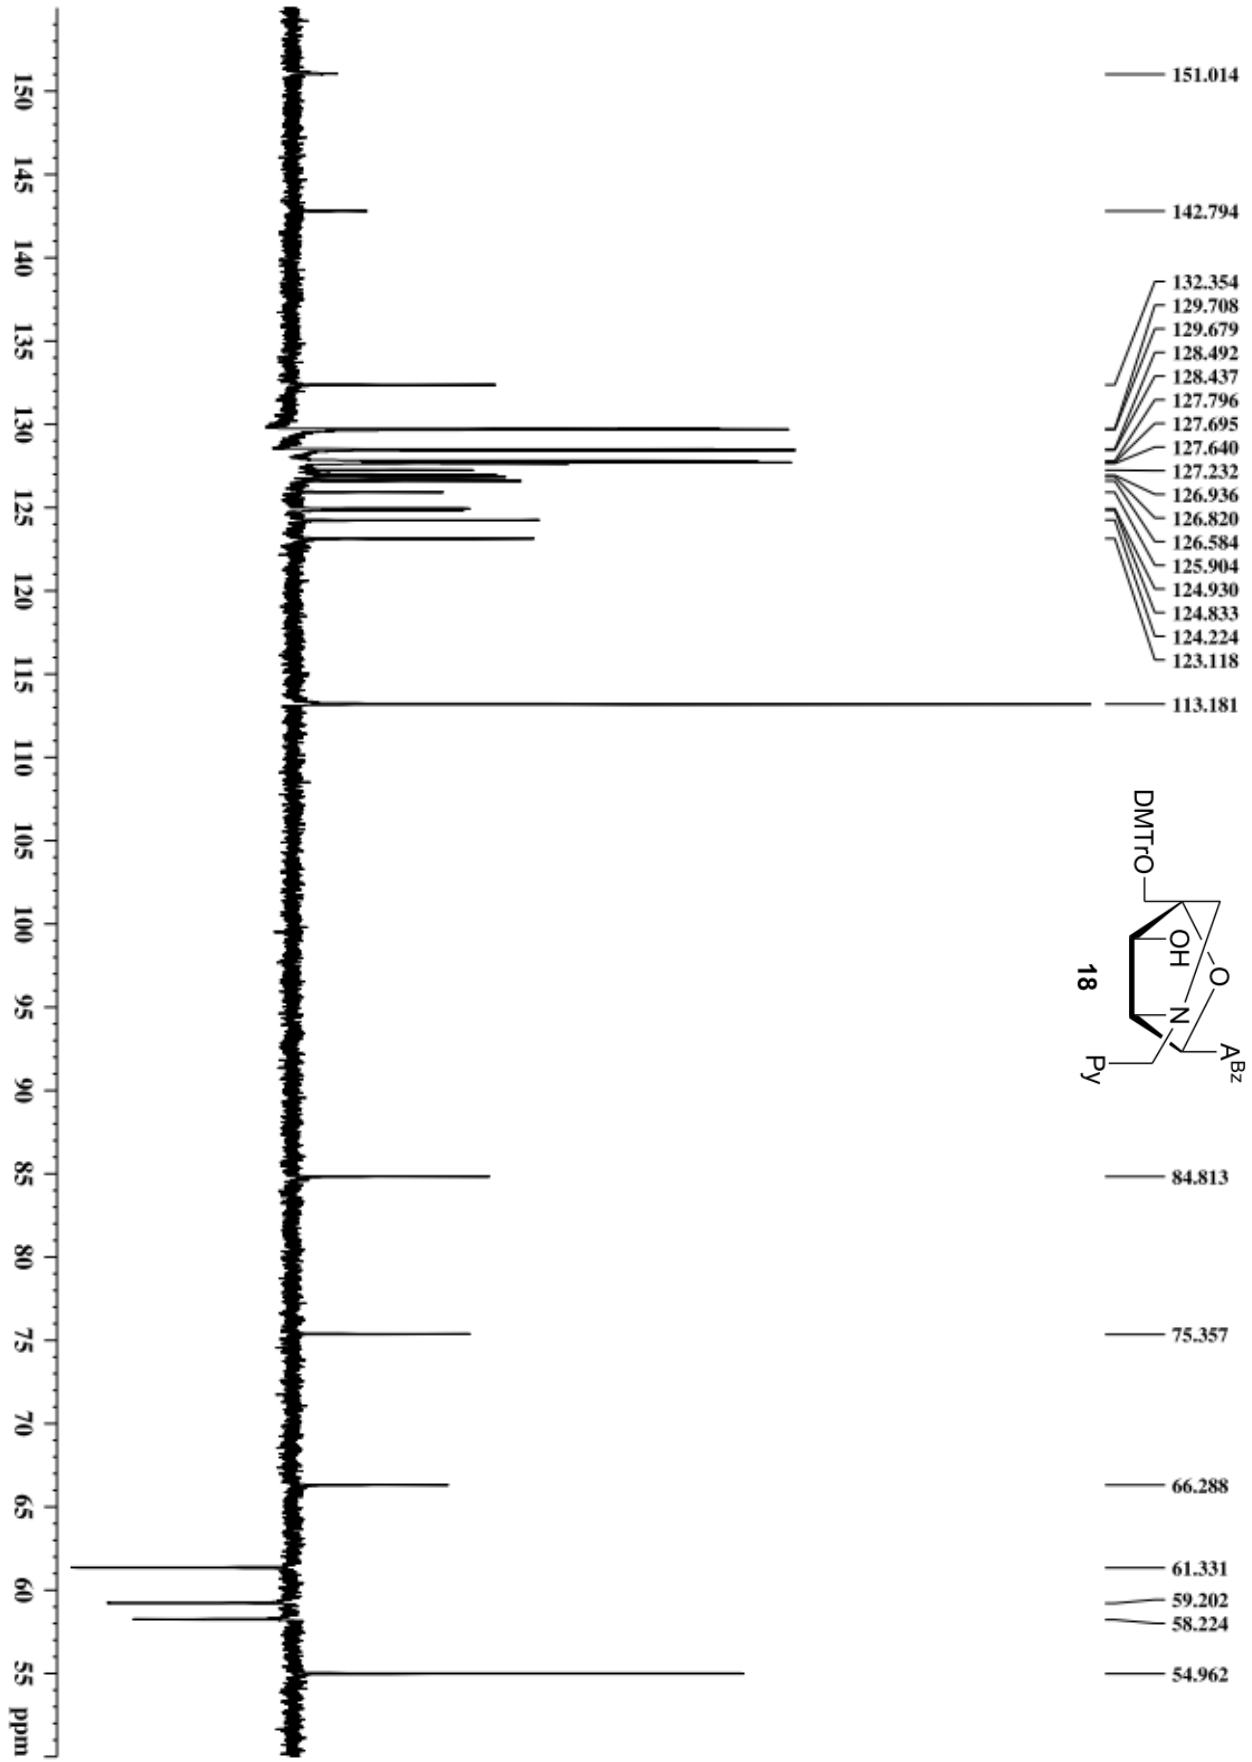

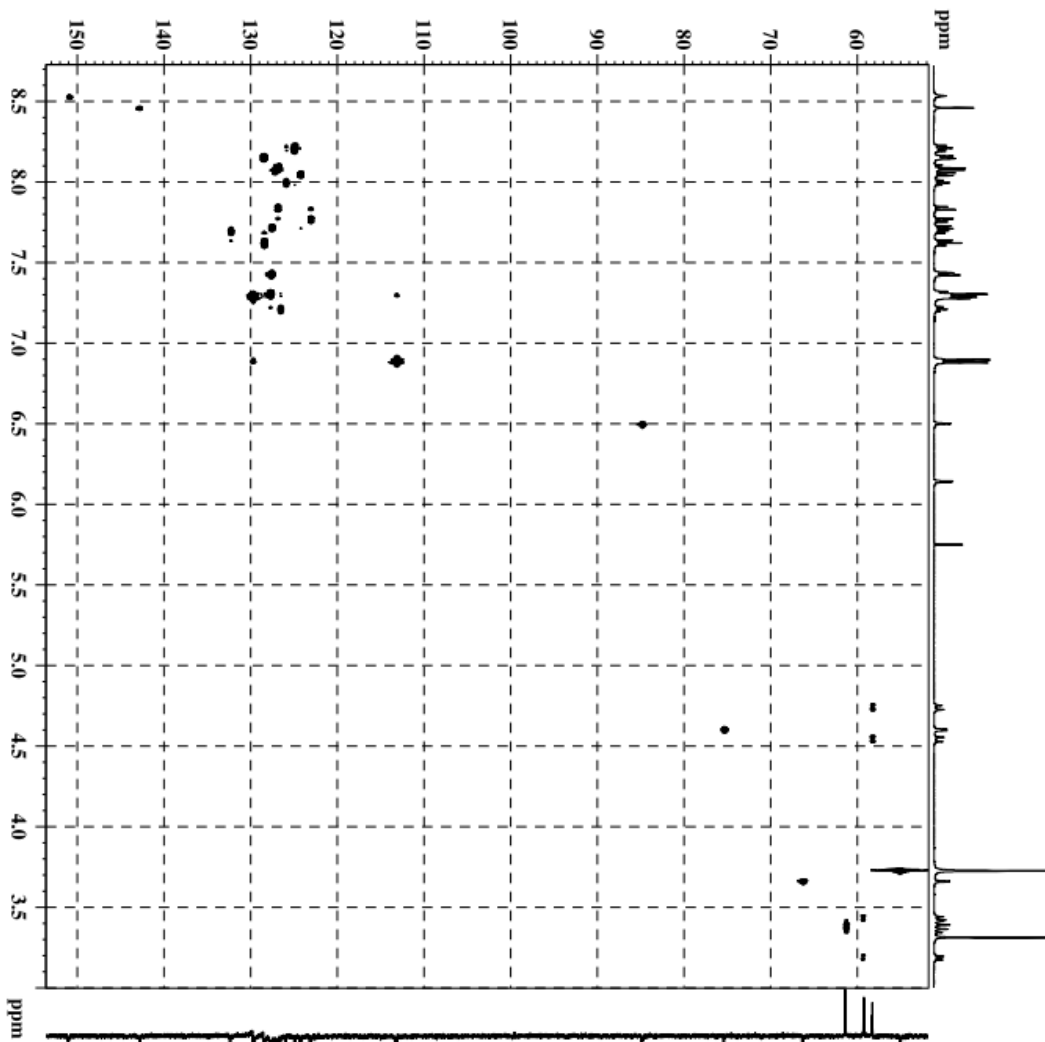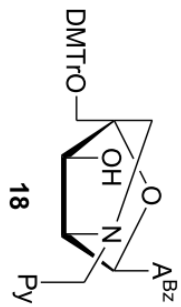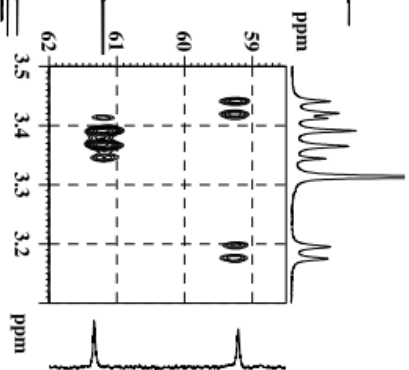

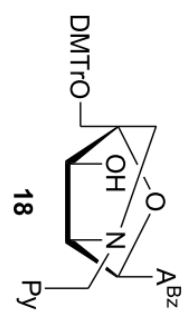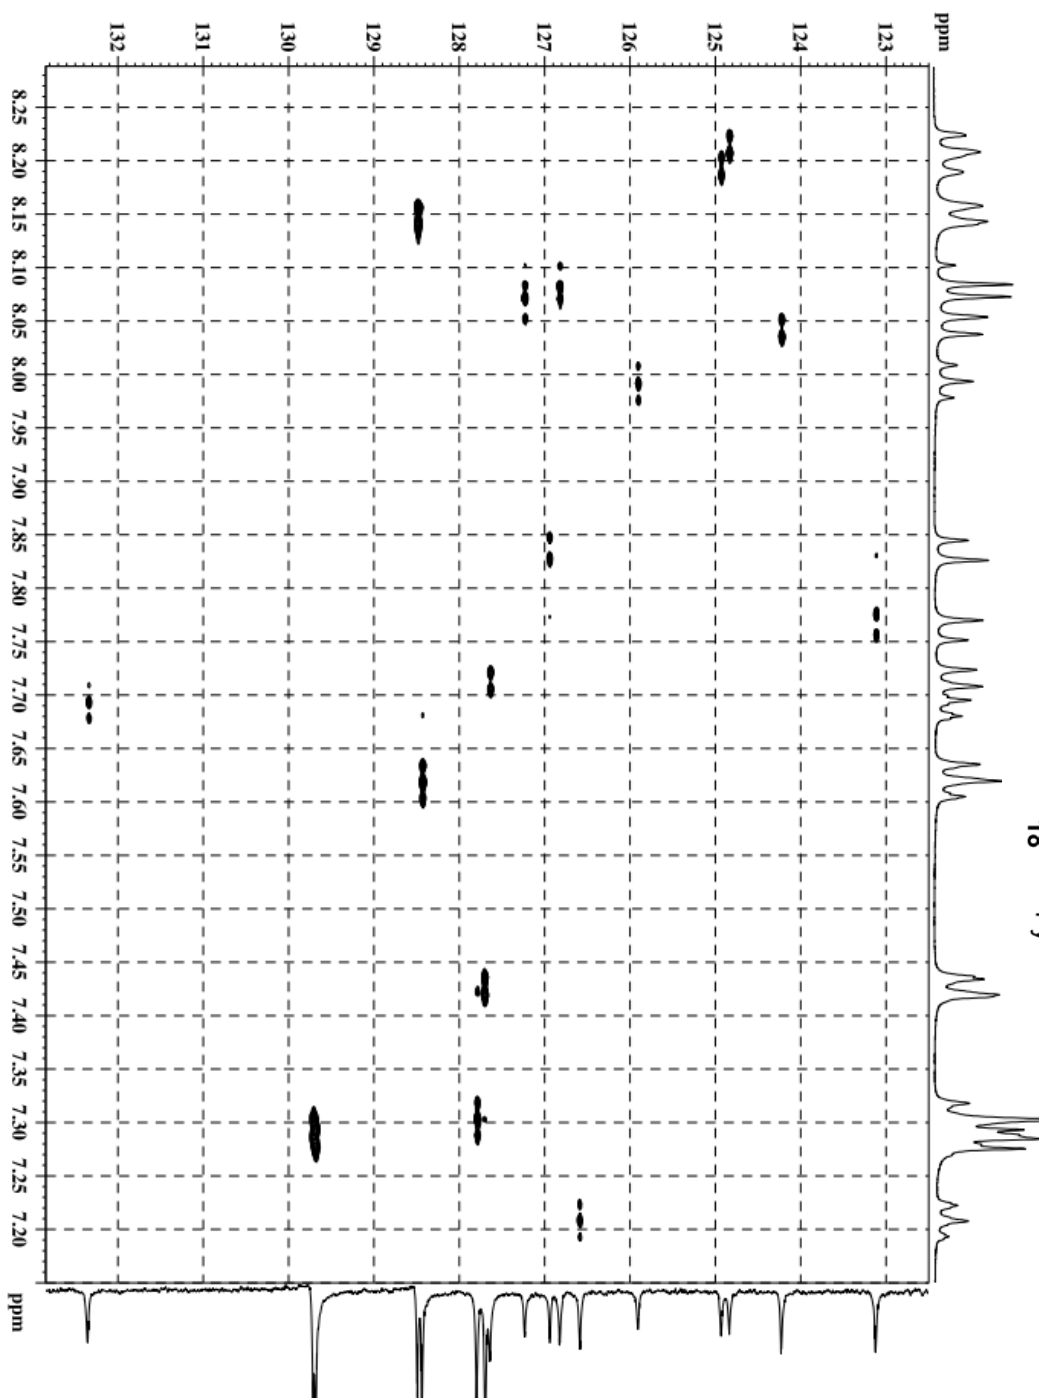

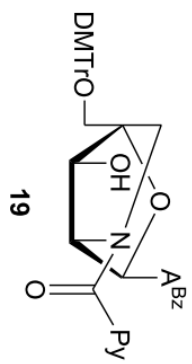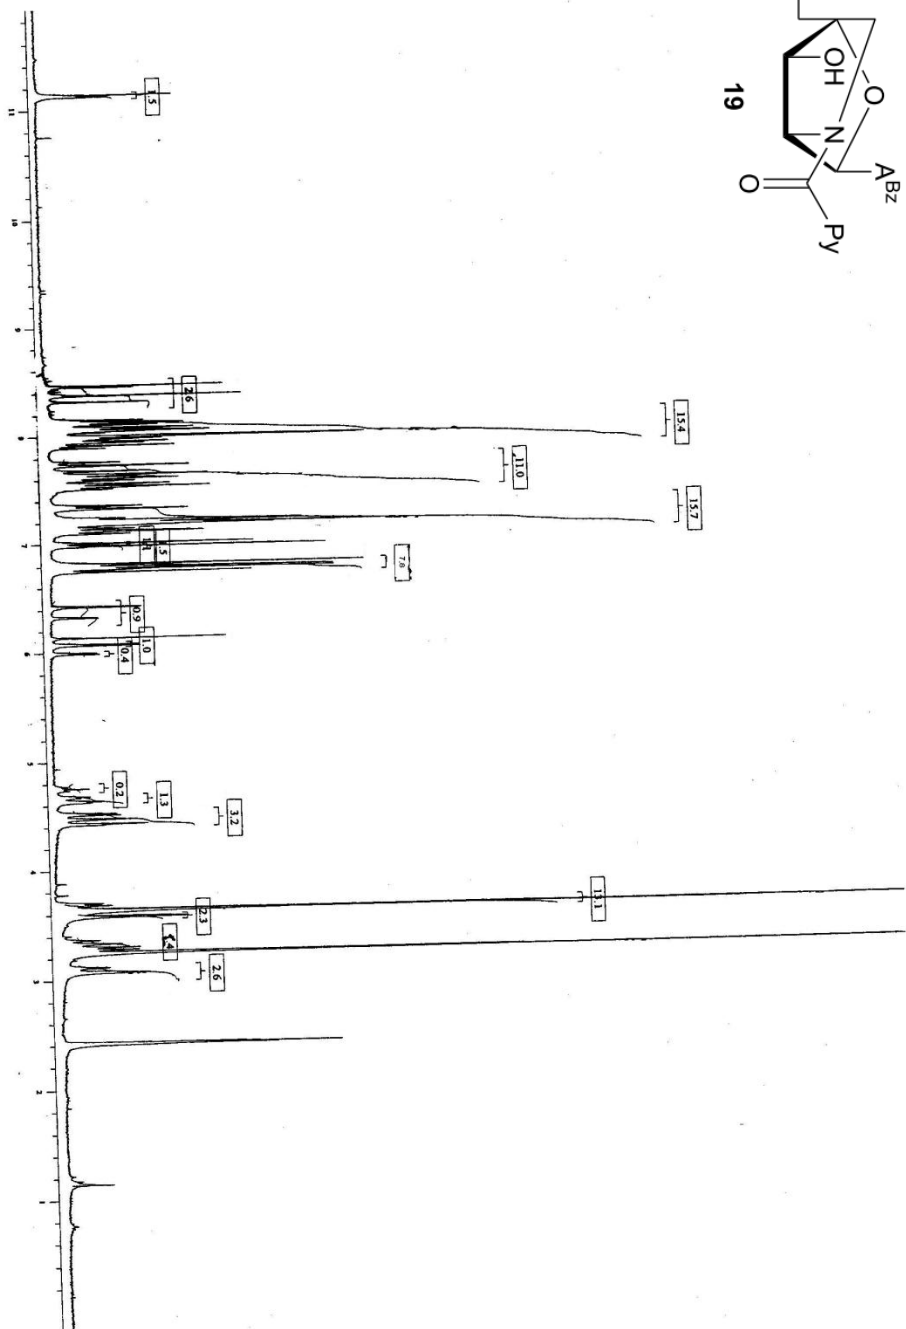



~ 0 ABz

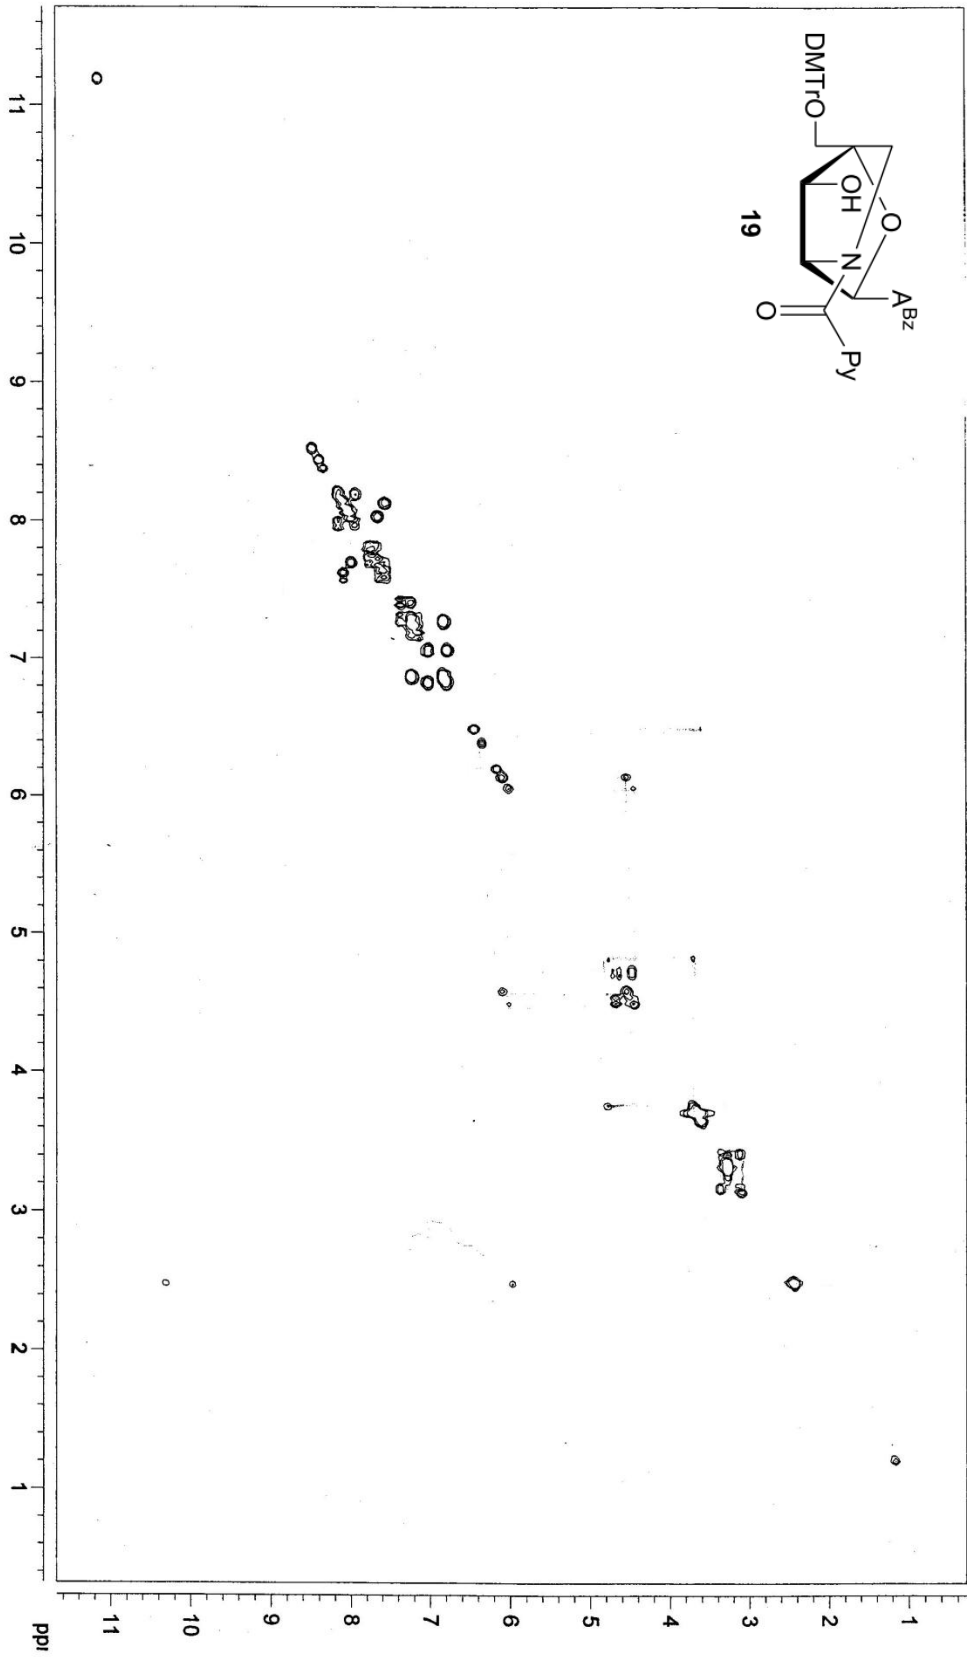

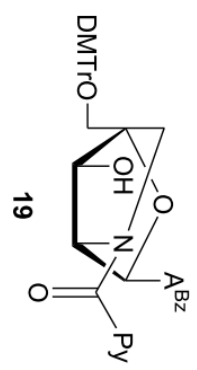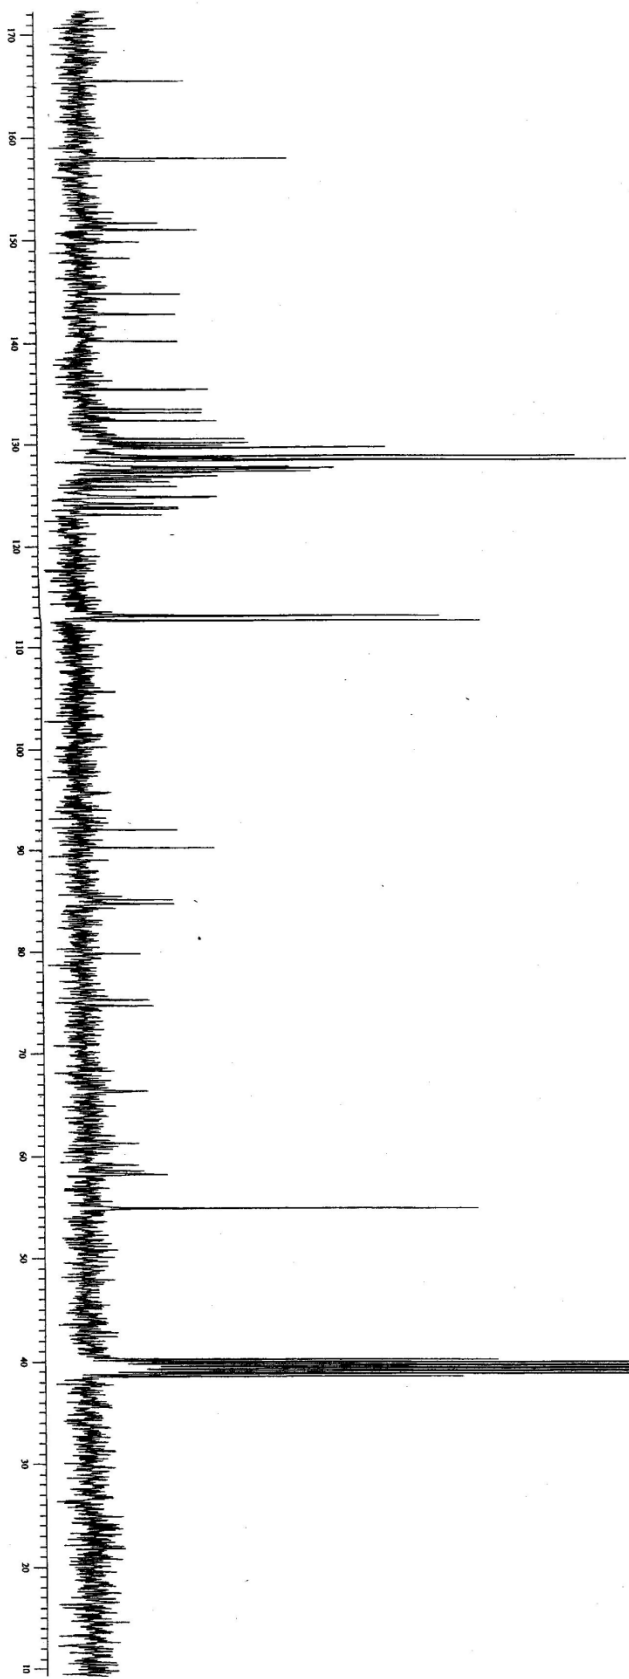

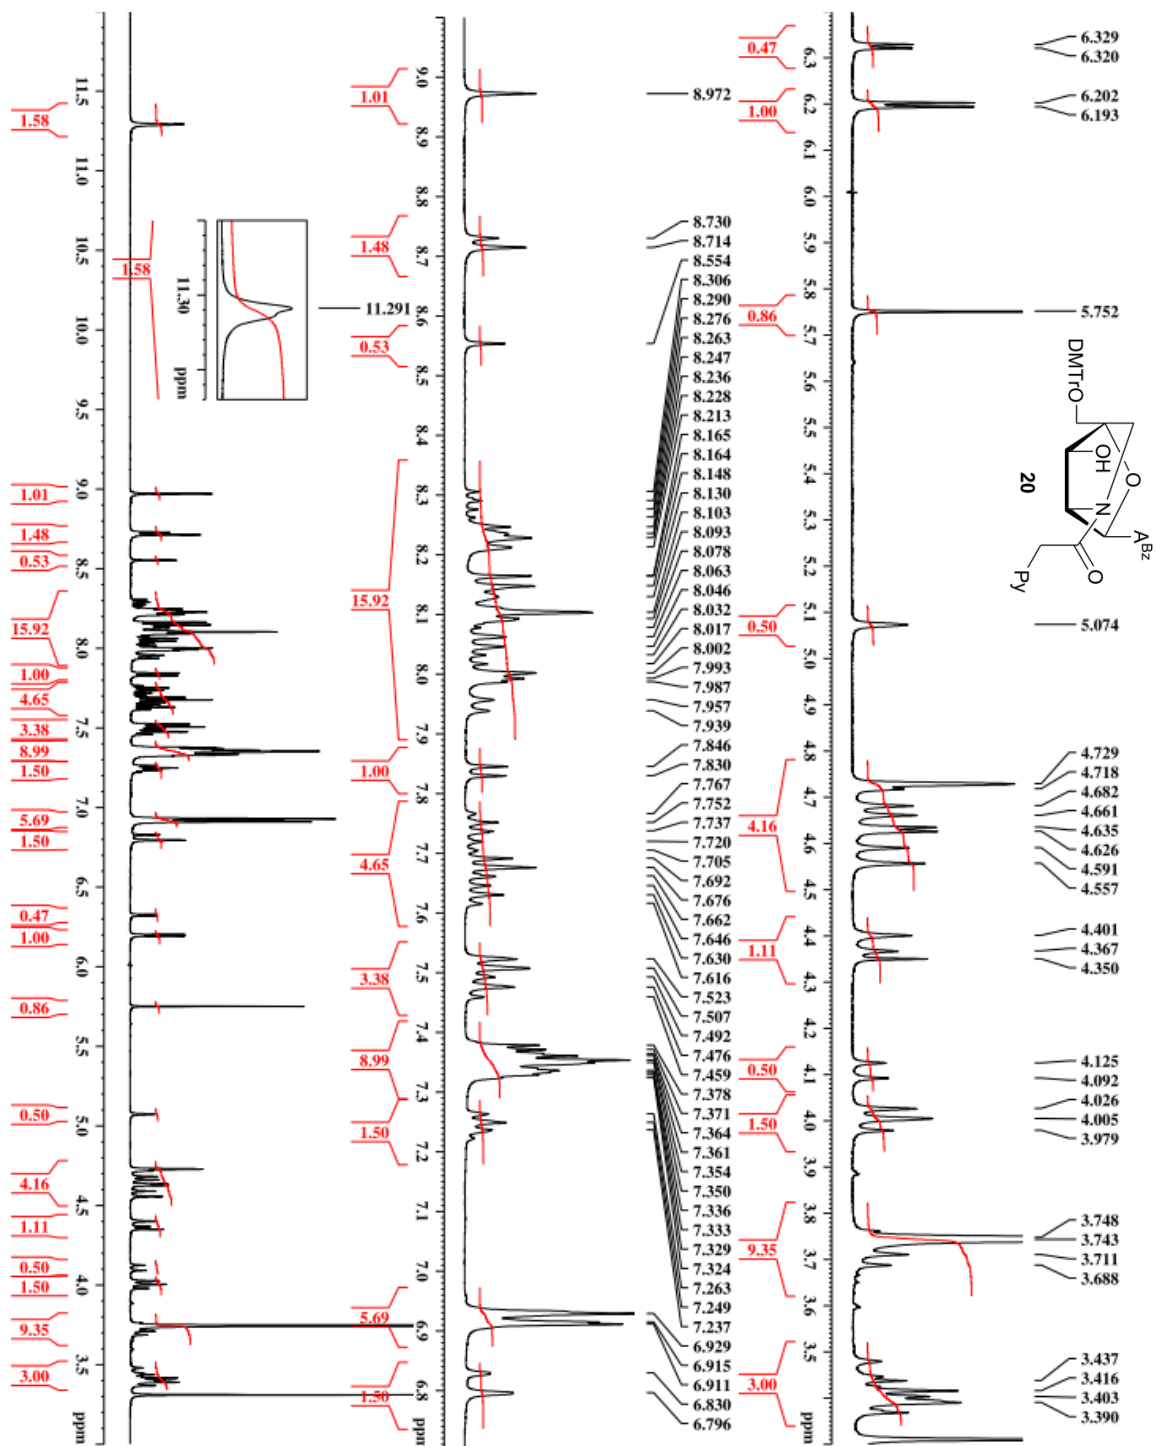

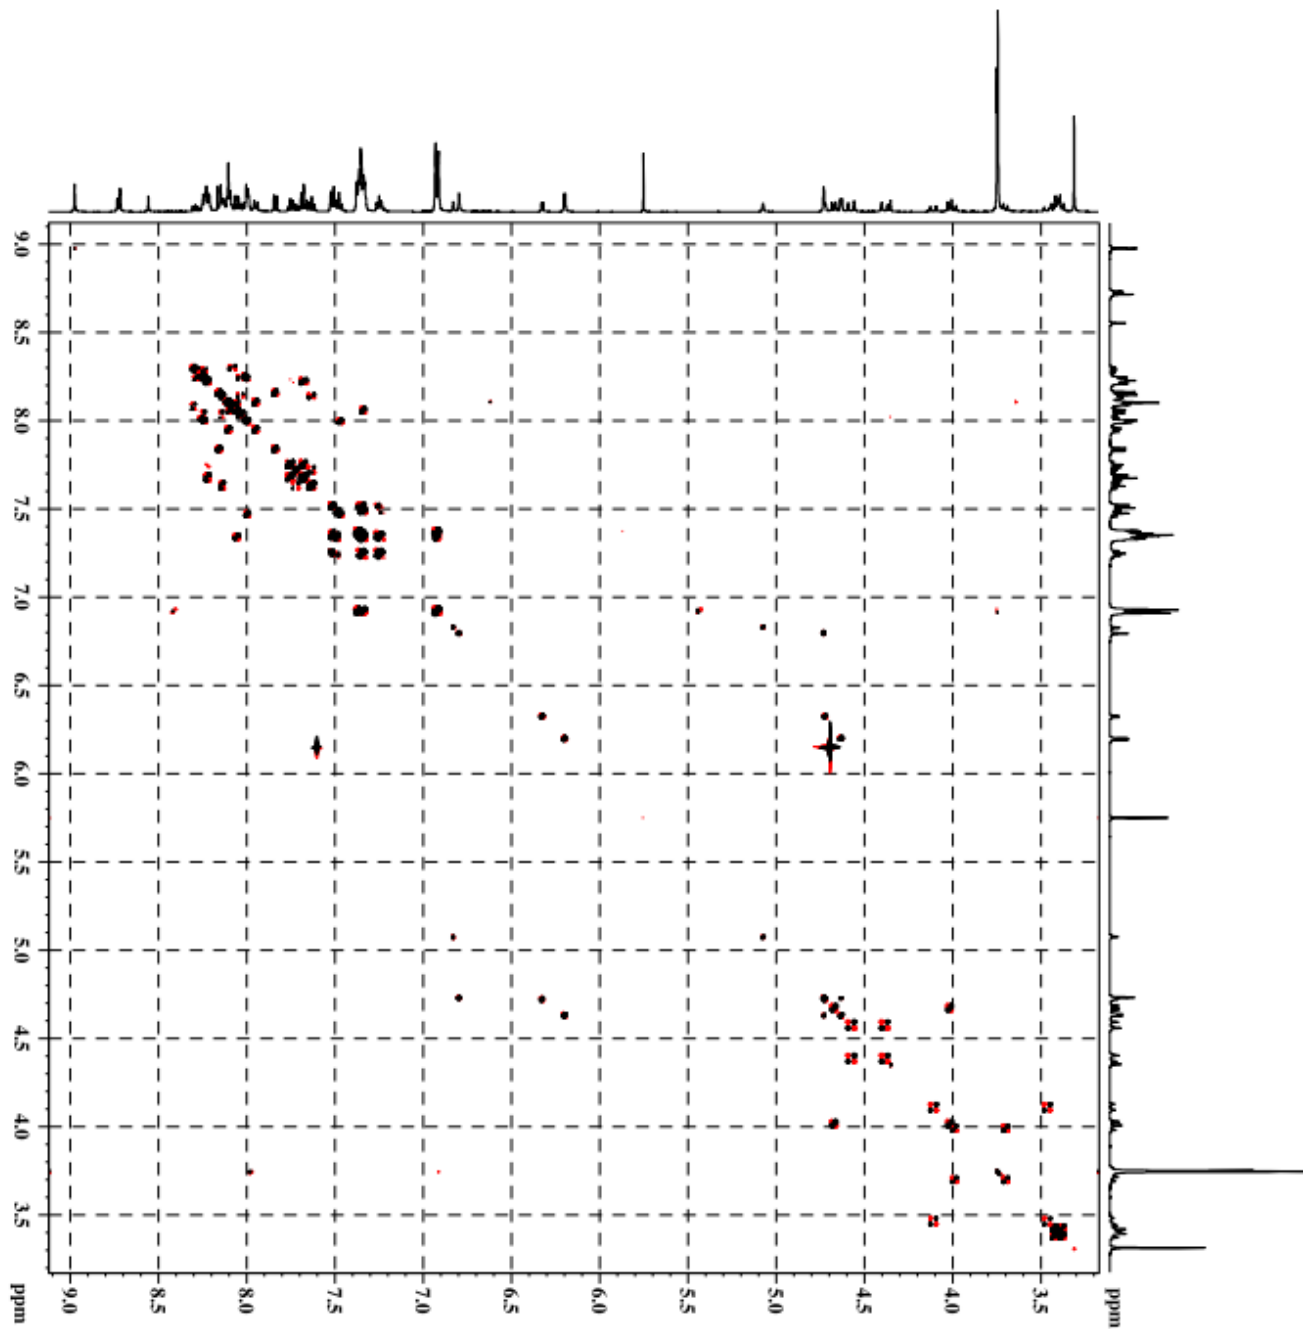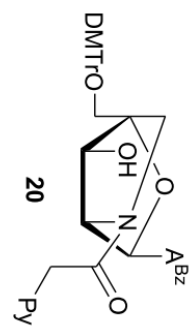

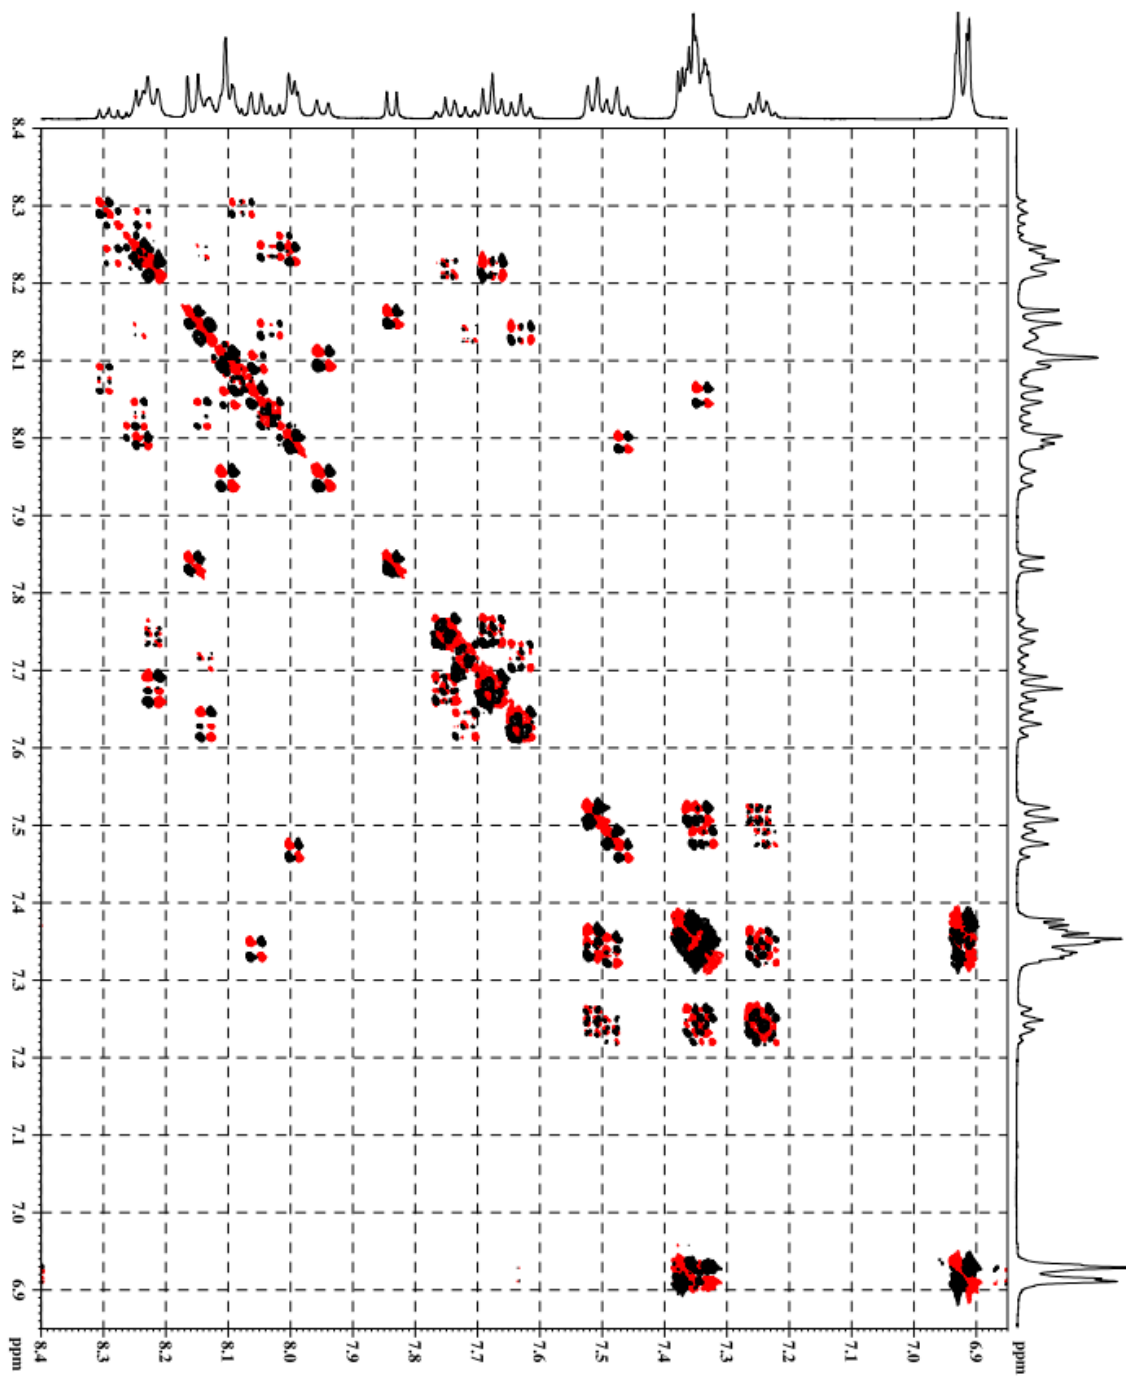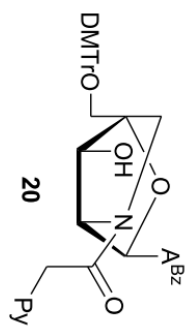

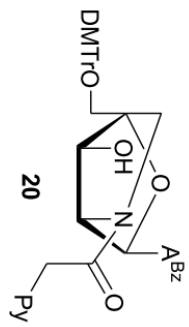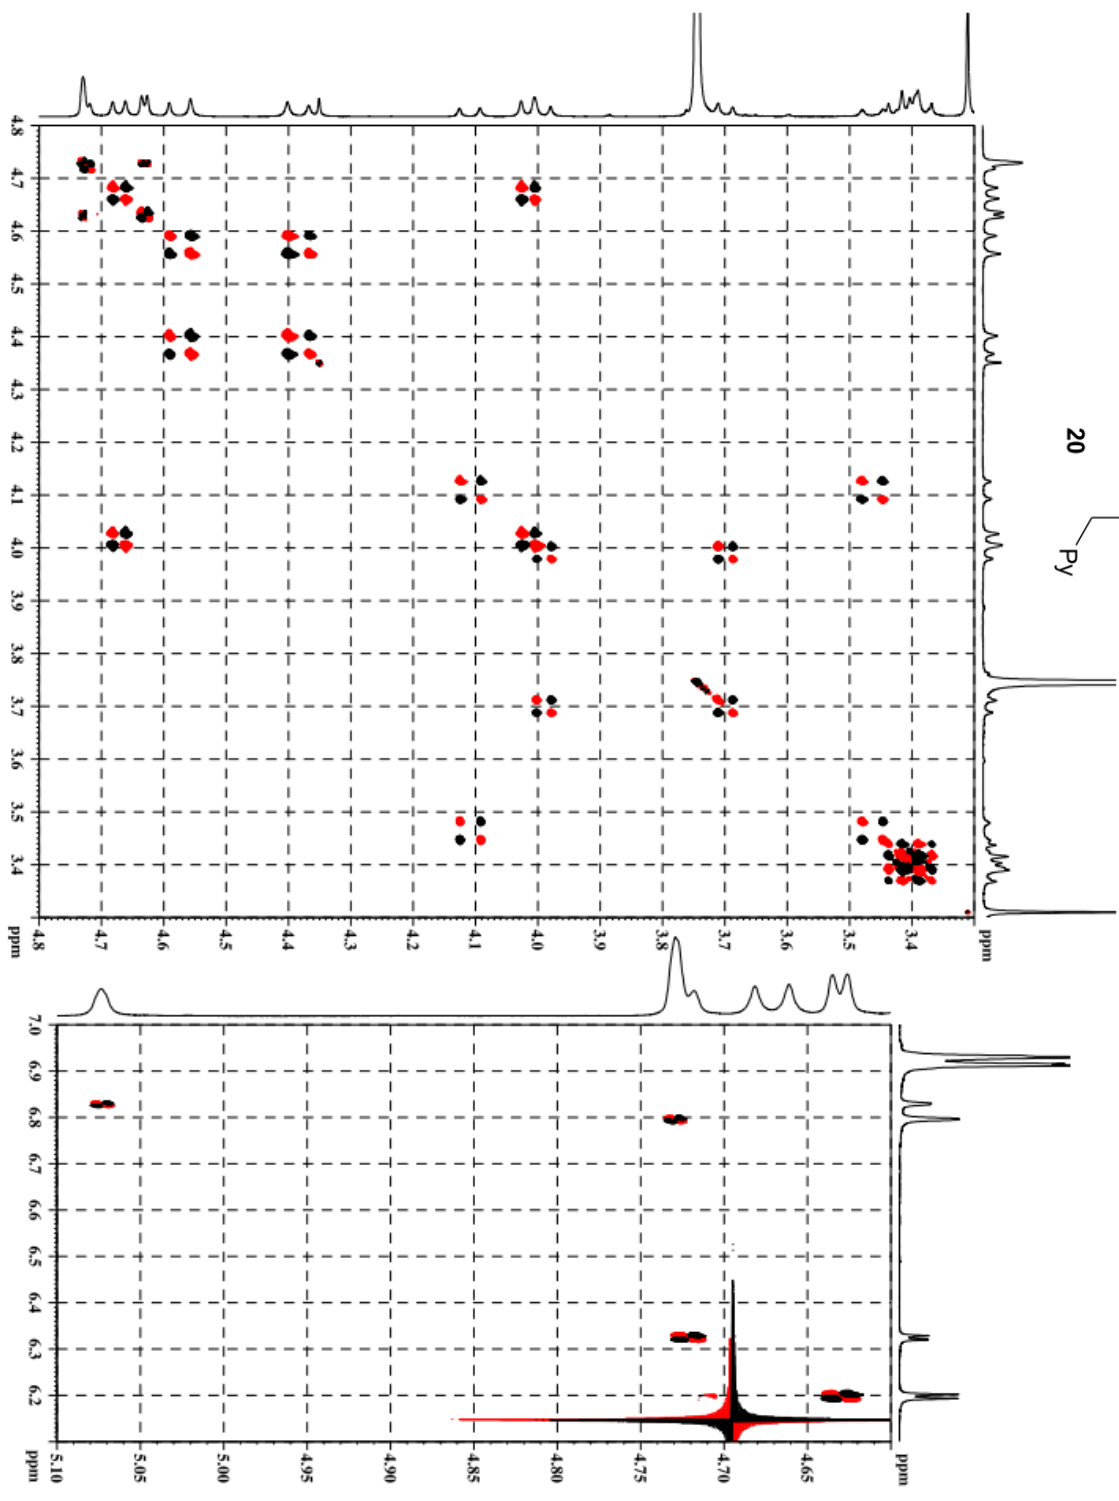

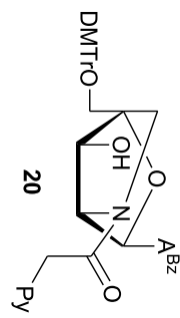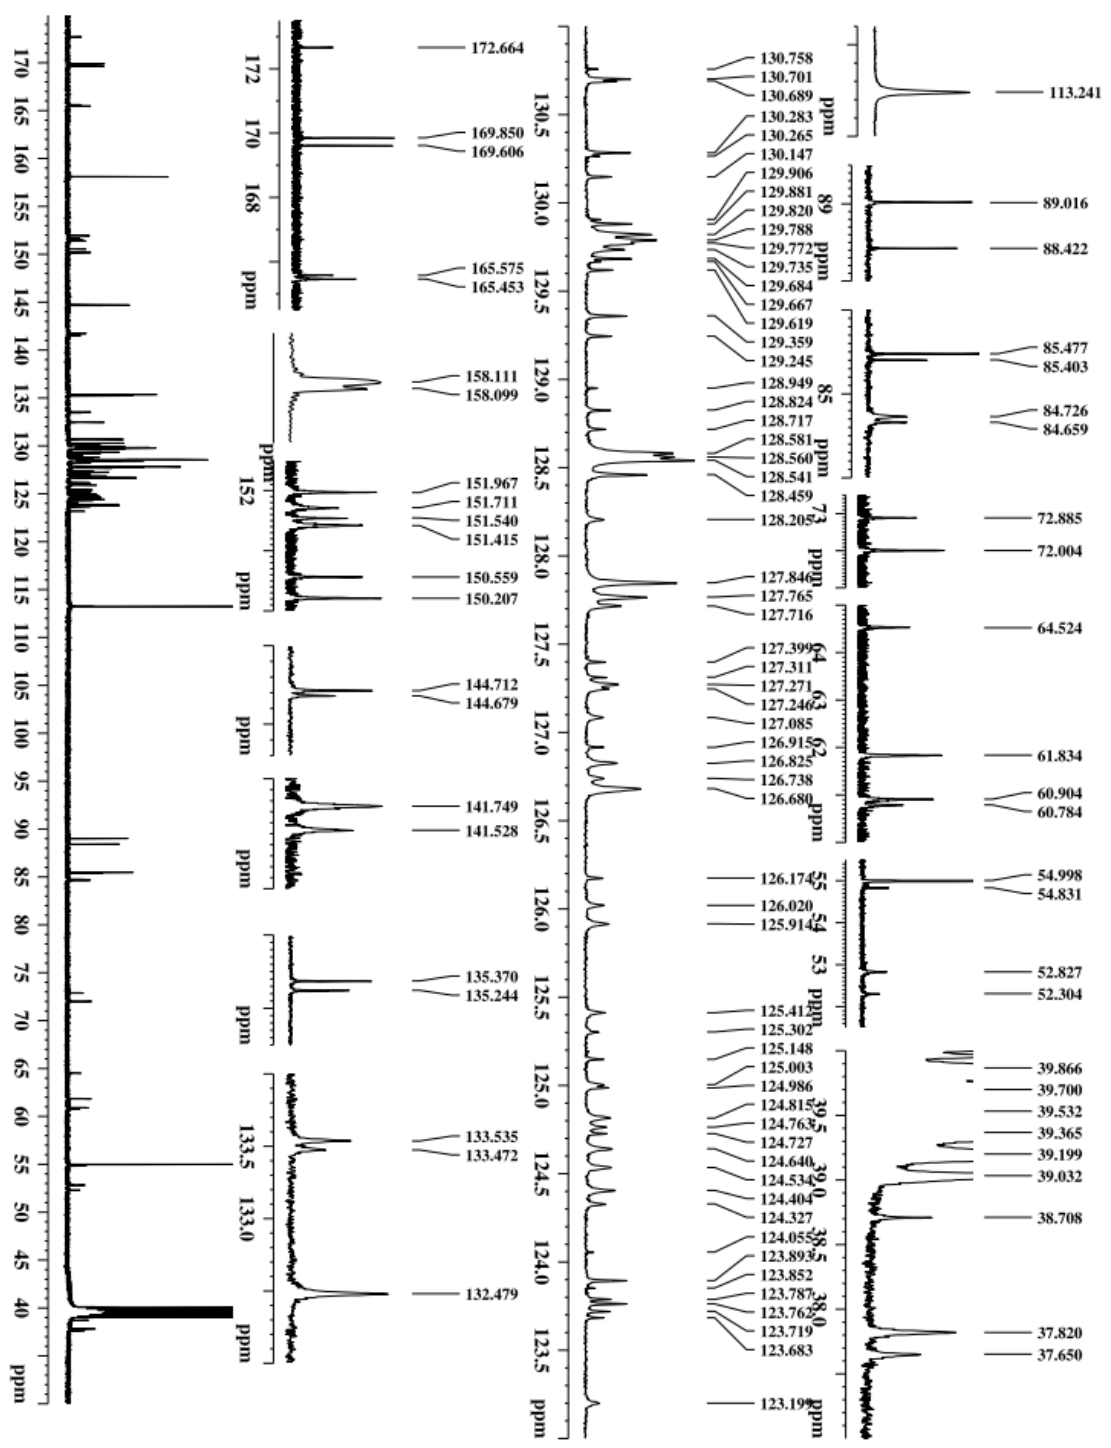

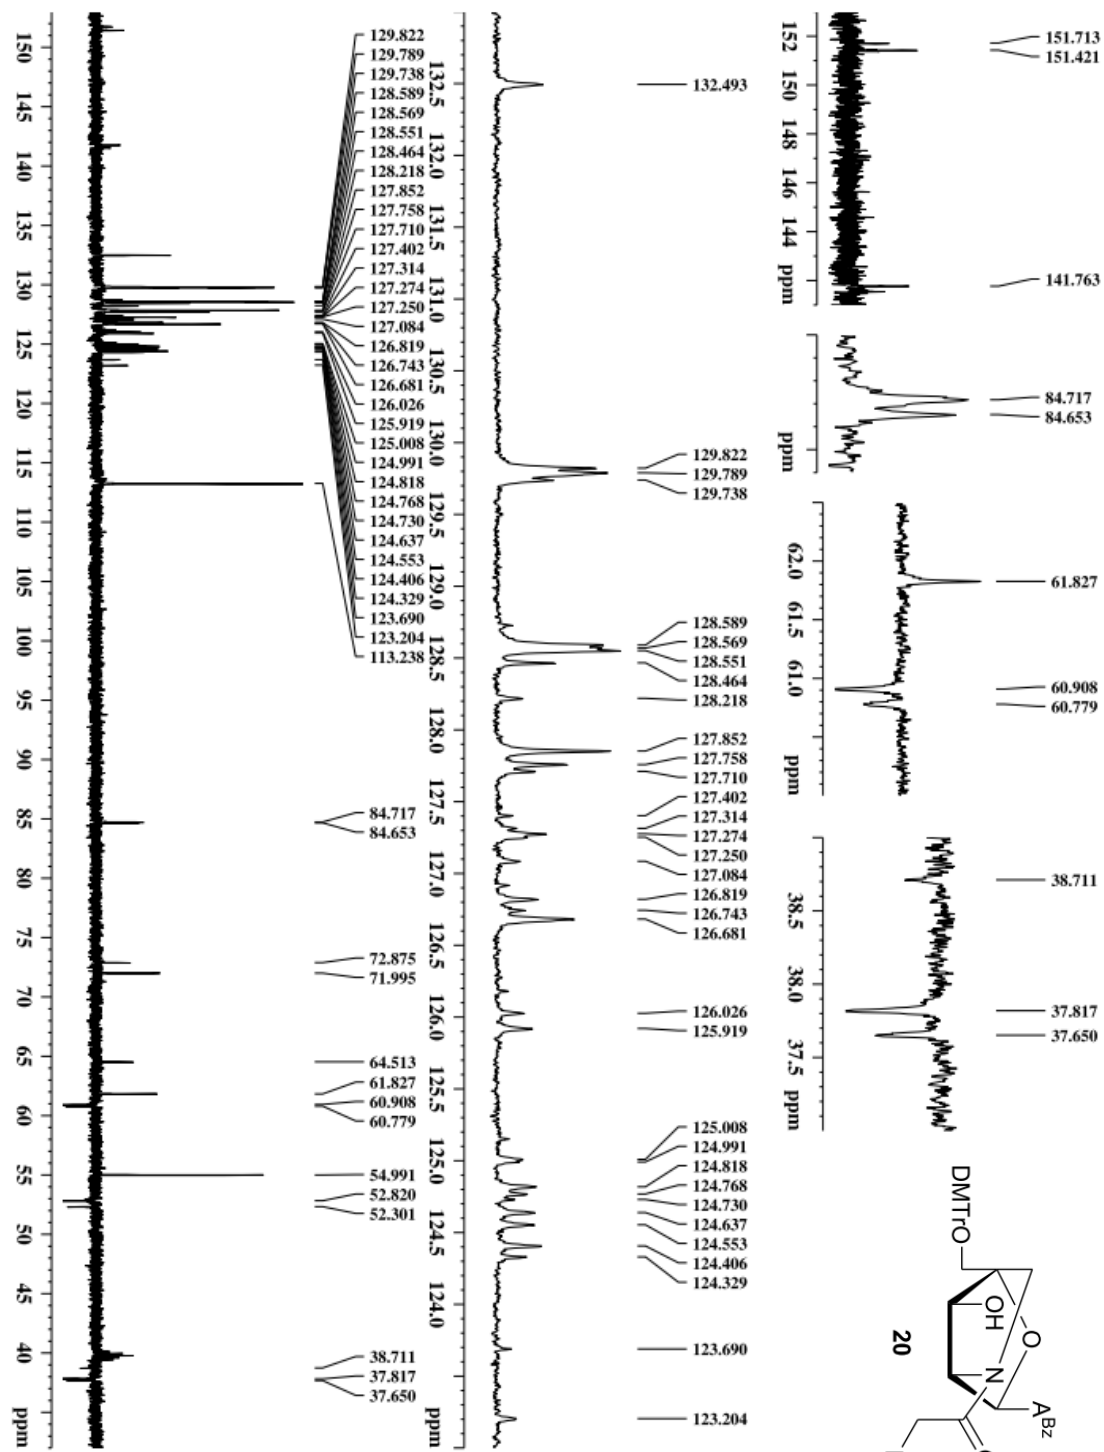



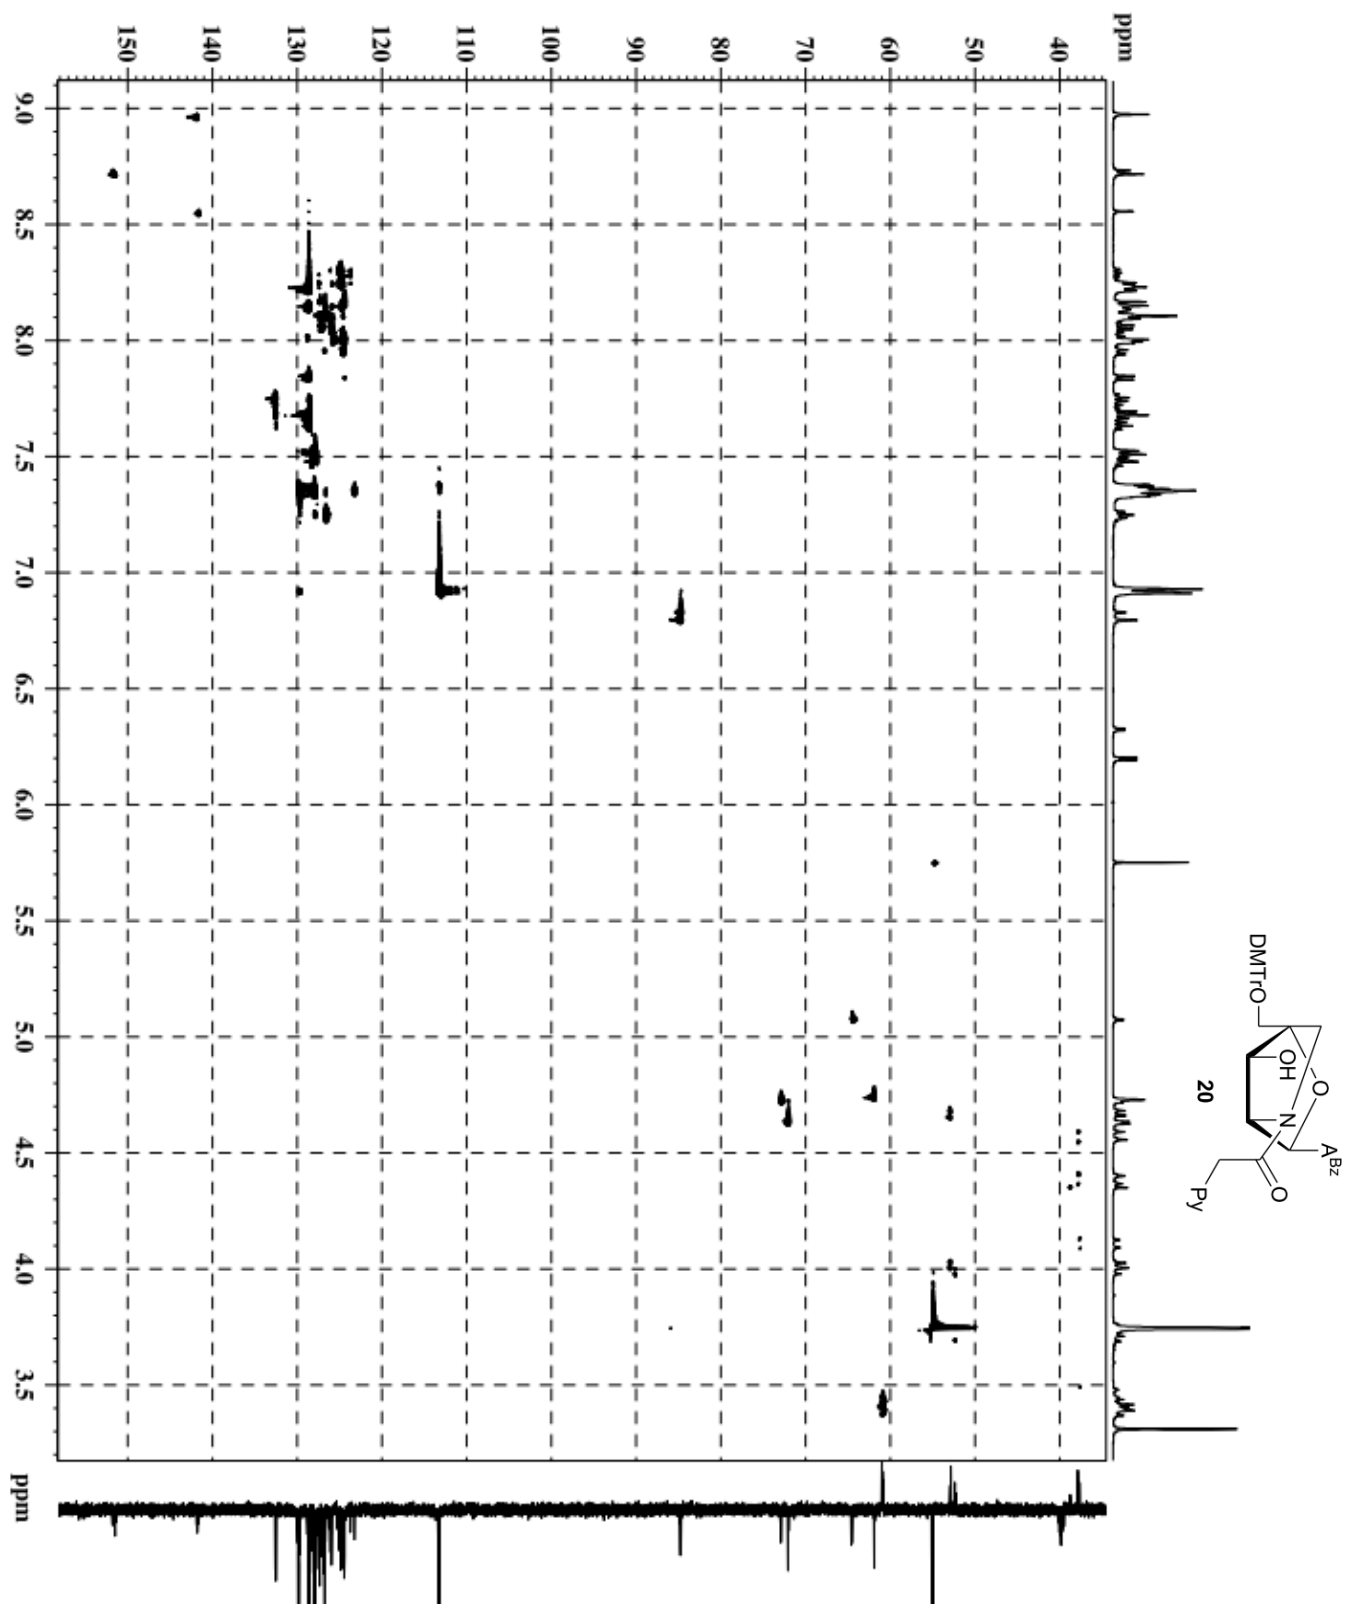

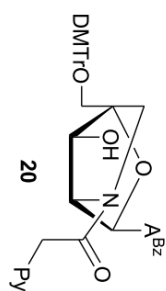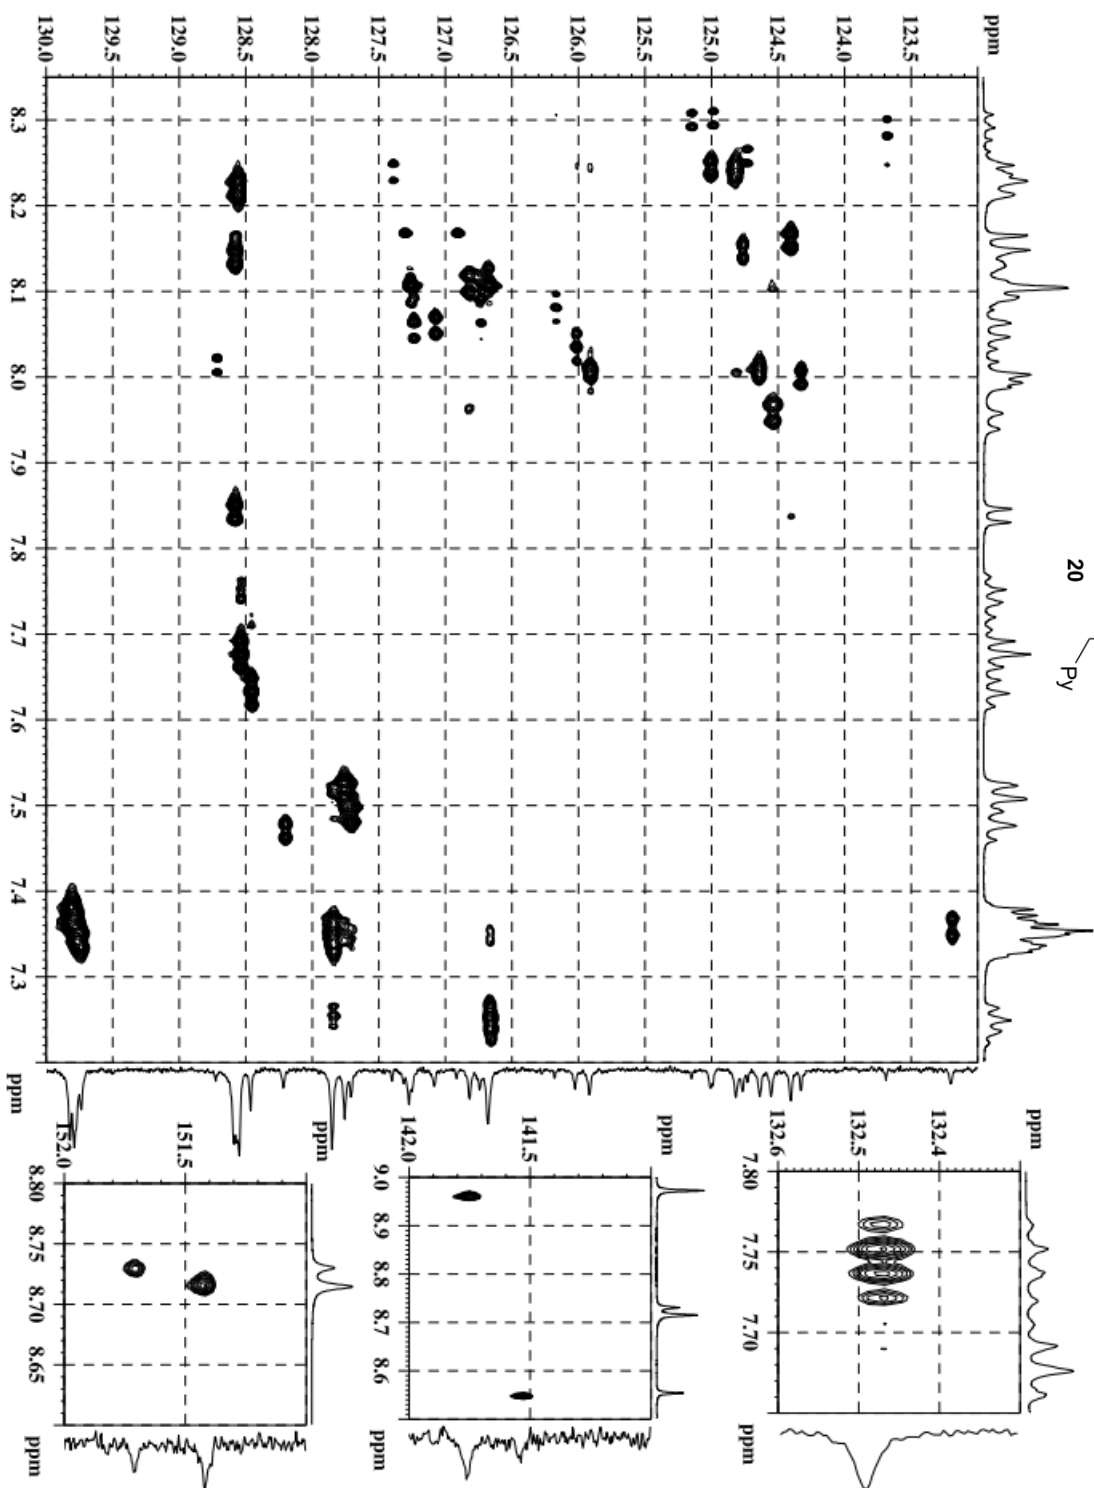

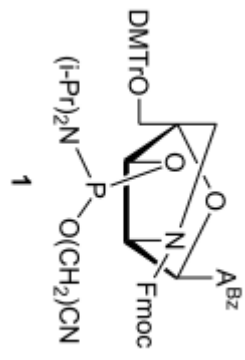

150.32  
 150.26  
 150.12  
 149.48

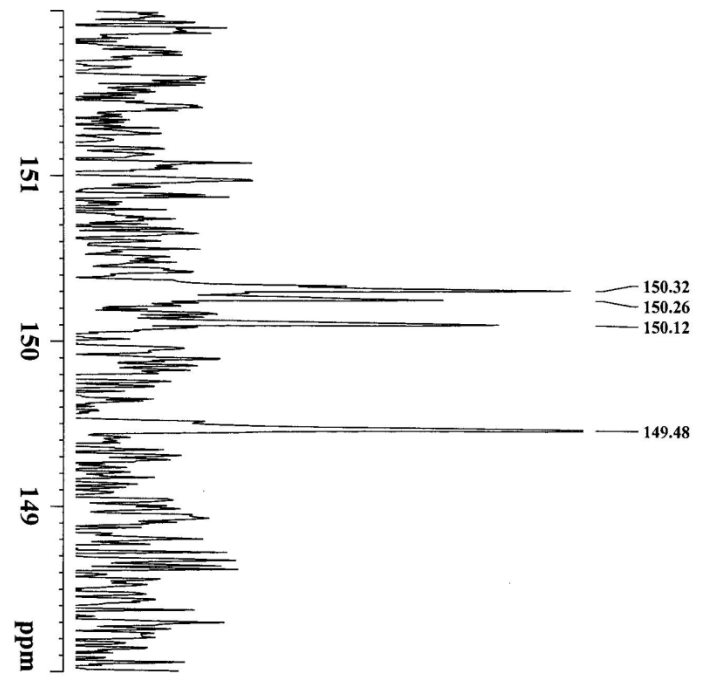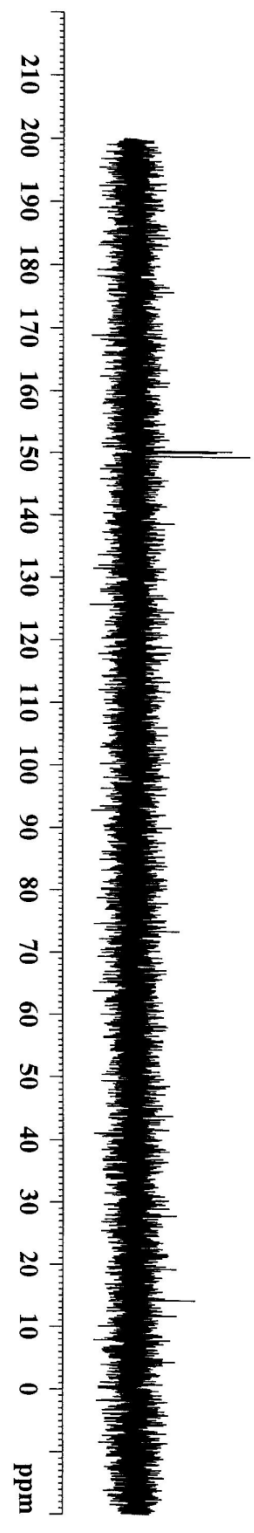

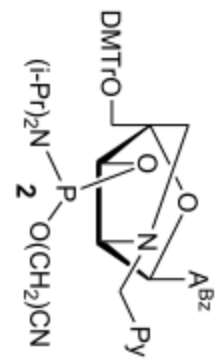

150.565  
148.378

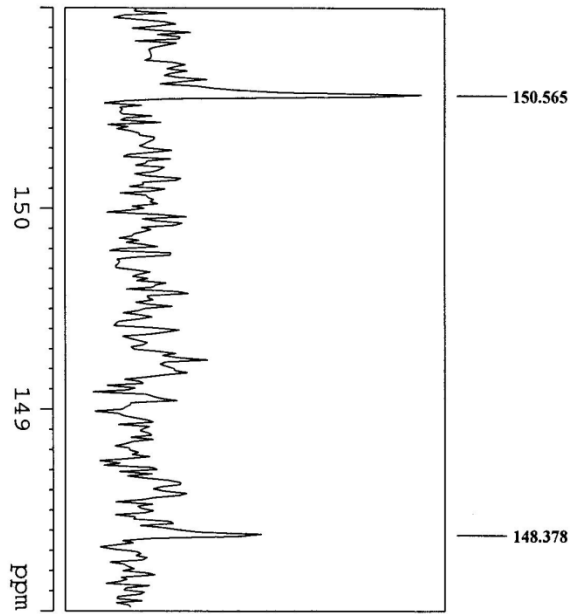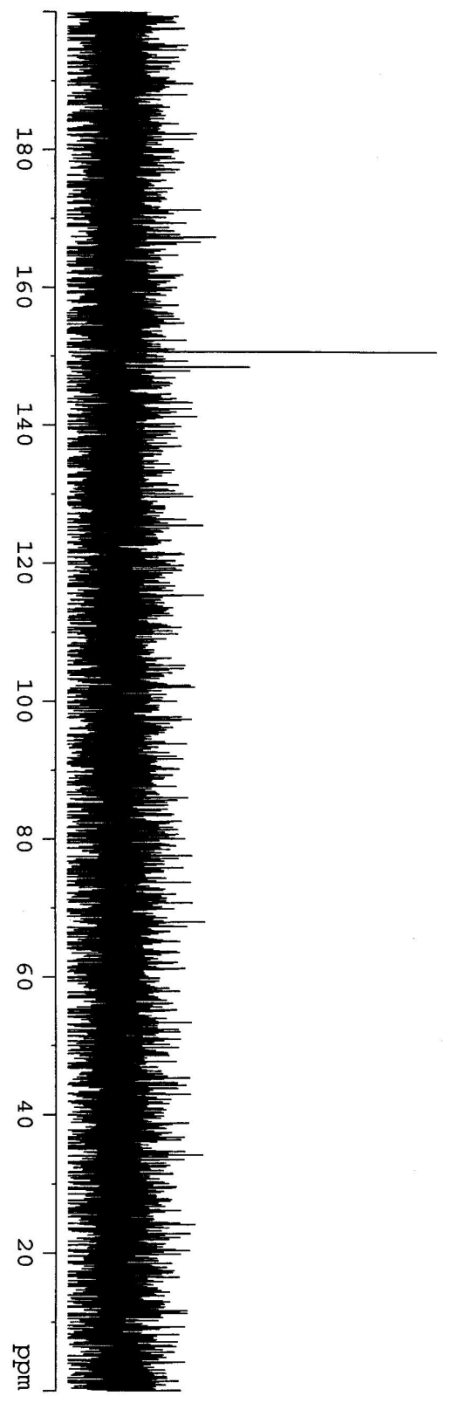

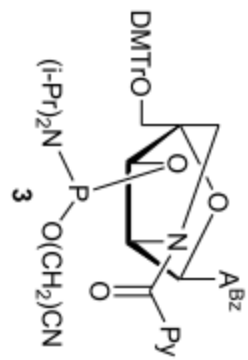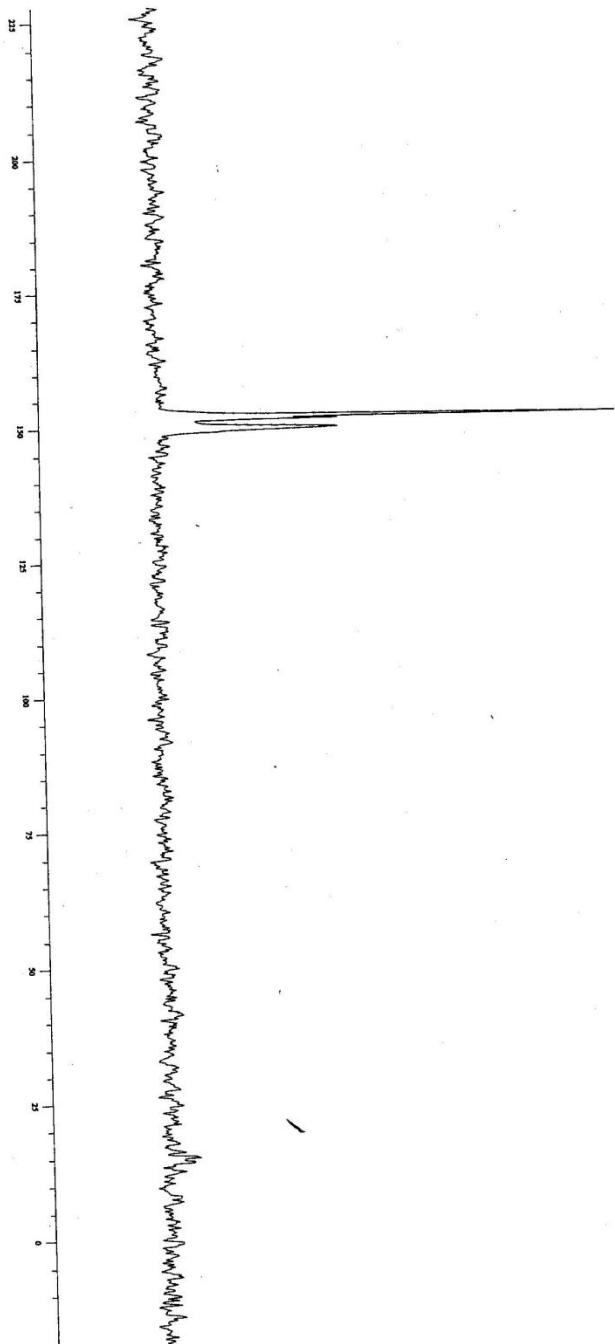

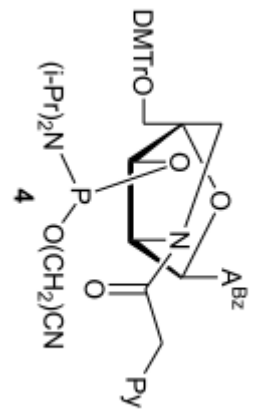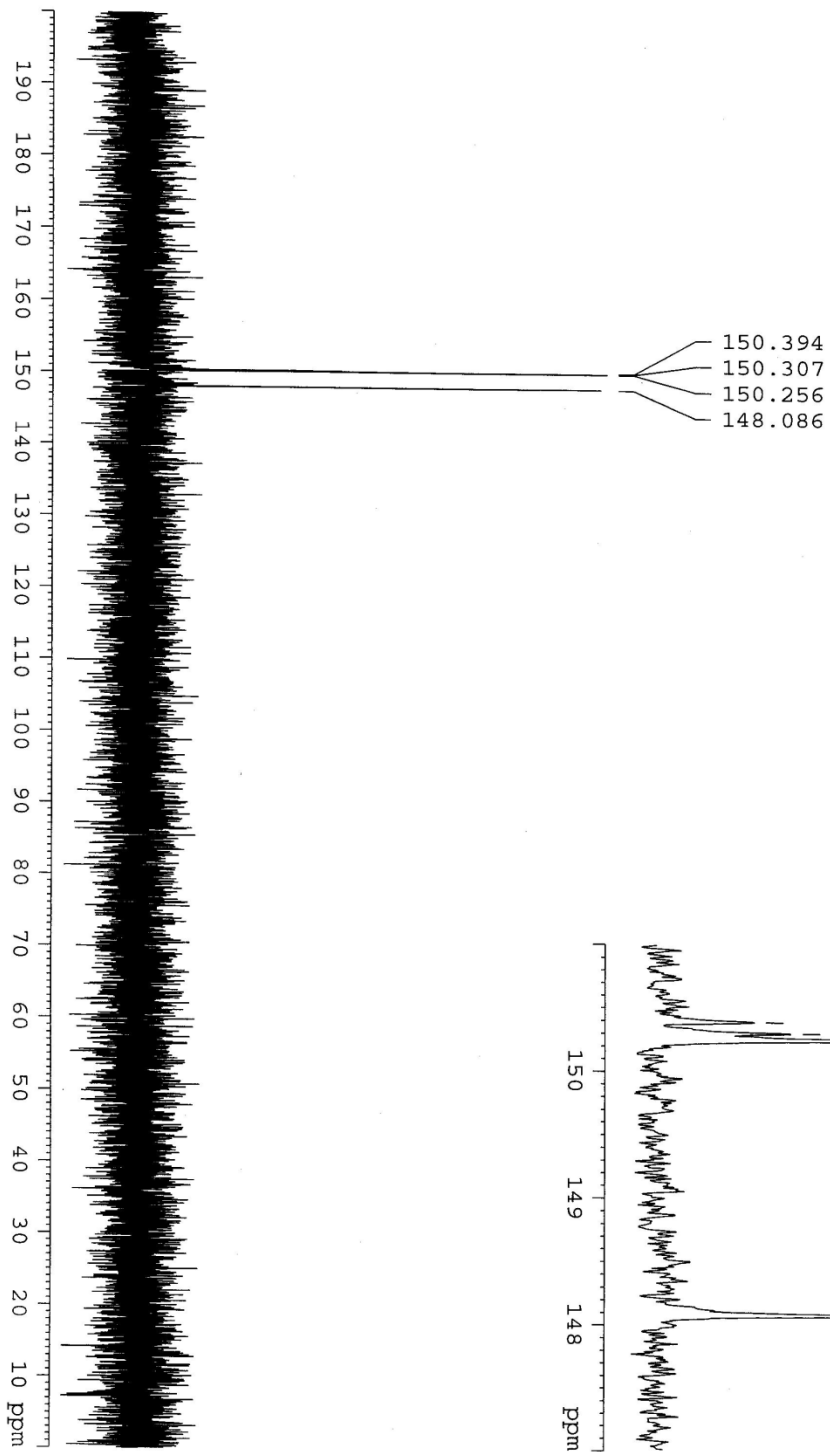

Supplement: NIHMS548827-supplement-1_si_001.pdf [file NIHMS548827-supplement-1_si_001.pdf]
